# Supplementary material for: Surface-Water Nutrient Conditions and Sources in the United States Pacific Northwest
Source: PubMed Central journal article supplement (PMC3307616; doi:10.1111/j.1752-1688.2011.00580.x), 2011-10
Supplement: jawr0047-1110-SD1.pdf [file jawr0047-1110-SD1.pdf]

## **Supplemental Information**

### ***SPARROW Model Background***

SPARROW models are calibrated by estimating model coefficients that minimize the difference between the predicted and observed mean annual stream loads at a large number of fixed monitoring stations that are widely distributed throughout and representative of a hydrologic region. To maximize the explanatory power of the models, the mean annual stream loads must be compiled from as many sites as possible and often including sites where data are not collected contemporaneously. To account for differences in record length and sample size between stations, the water-quality records for the stations are detrended to reflect conditions during a single base year (Preston *et al.*, 2009). The base year (2002 for our analysis) is selected to provide the greatest overlap between water-quality and streamflow records and is usually consistent with the temporal availability of the explanatory data used in the model. The detrended, mean annual stream loads are also normalized to long-term, mean hydrologic conditions to account for short-term spatial variability in precipitation across a region. This means that the measured stream loads used to calibrate a SPARROW model can be interpreted as the mean annual stream load that would have occurred in a specified base year if the mean annual streamflow for that year was equal to the long-term mean annual streamflow for the period of record.

### ***Stream Reach Attributes***

The SPARROW model includes a variable that allows the user to simulate the diversion of streamflow in a hydrologic network (the “frac value”, which is the fraction of streamflow that is delivered from one reach to the reach immediately downstream). We employed three methods for estimating frac values. The first, and preferred method, was to compare the measured, long-

term, mean annual streamflow between gages located upstream and downstream from known irrigation diversions and to calculate the ratio between the downstream and upstream values. When the upstream and downstream gages were separated by more than one reach, the frac value was scaled equally over the intervening reaches. When only one gage was available with long-term, mean annual streamflow and it was located above known irrigation diversions for which estimates could be made of the long-term mean annual discharge, the frac value was calculated by subtracting the total discharge for the diversions from the value for the upstream gage and dividing this value by the value for the upstream gage. The last, and least preferred method, was to compare the estimated long-term, mean streamflow for sequential reaches on the RF1 network (Brakebill *et al.*, 2011). A frac value less than 1.0 was assigned to any reach in which there was a decrease in estimated streamflow between that reach and the reach immediately upstream. The approach we used to account for irrigation diversions in the PNW caused nutrient stream load to be removed from the modeled stream network, but did not return any of that stream load back to the network because we did not have the data needed to estimate this. Most of the water used for irrigation is taken up by crops or is lost through evaporation, and some leaches into deep groundwater. The remaining water, along with nutrients originally in the water and nutrients collected as it passes over agricultural land, is returned directly to streams through irrigation return drains or through shallow groundwater. Although our estimates of the frac values likely did not provided a full accounting of the hydrologic budget for the PNW, the values were based on the best available information and led to a more accurate model than otherwise would have been possible without including them.

Table S1 and Figure S1 provide details on the 303(d) listing in the PNW related to nutrient enrichment.

Table S1. Compilation of Stream Reaches Placed on State 303(d) Lists in the United States Pacific Northwest Because of Impairment Related to Nutrient Enrichment.

Figure S1. Prevalence of 303(d) Listings Because of Impairment Related to Nutrient Enrichment in the United States Pacific Northwest.

### ***Watershed Attributes***

The watershed attributes used in the PNW SPARROW models are shown in Figures S2 – S14.

Figure S2. Dominant Land Use in the United States Pacific Northwest (2001).

Figure S3. Point Source Discharges of Total Nitrogen in the United States Pacific Northwest (2002 estimates).

Figure S4. Point Source Discharges of Total Phosphorus in the United States Pacific Northwest (2002 estimates).

Figure S5. Mean Annual Wet Deposition of Inorganic Nitrogen in the United States Pacific Northwest.

Figure S6. Nitrogen Input from Farm Fertilizer in the United States Pacific Northwest (2002 estimates).

Figure S7. Phosphorus Input from Farm Fertilizer in the United States Pacific Northwest (2002 estimates).

Figure S8. Nitrogen Input from Manure from Livestock Production in the United States Pacific Northwest (2002 estimates).

Figure S9. Phosphorus Input from Manure from Livestock Production in the United States Pacific Northwest (2002 estimates).

Figure S10. Mean Soil Permeability in the United States Pacific Northwest.

Figure S11 Percentage of Land Area Consisting of Hydrologic Landscape Region 20 in the United States Pacific Northwest.

Figure S12. Effective Mean Annual Precipitation in the United States Pacific Northwest.

Figure S13. Basal Density of Red Alder Trees in the United States Pacific Northwest (2001 estimates).

Figure S14. Estimated Concentration of Phosphorus in Surficial Geologic Material in the United States Pacific Northwest.

The dominant land use was determined using data from the National Land Cover Database (NLCD (Homer *et al.*, 2004)). The area of forest land in each watershed was estimated by summing the area of land classified as deciduous, evergreen, and mixed forests in the NLCD. The area of developed land in each watershed was estimated by summing the area of land classified as low, medium, and highly developed in the NLCD. Developed land classified as open space in the NLCD was not included in our estimate because this category included roads in nondeveloped watersheds. In addition, the area of developed land in watersheds where the population density was less than 10 people per km<sup>2</sup> was set to zero.

The total red alder basal area within each SPARROW watershed was estimated for 2001. The red alder species models obtained from the Landscape, Ecology, Modeling, Mapping and Analysis (LEMMA) project (LEMMA, 2008 for Oregon; Mathew Gregory, Oregon State University, written commun., September 8, 2008 for Washington) were raster files with 30 meter cells. Estimates of red alder basal area density were extracted from each of the 5 raster files and

merged into a single raster file, from which the total red alder basal area in each SPARROW watershed was estimated.

The phosphorus sampling performed by the National Geochemical Survey (USGS, 2004) was limited to select streams in the PNW. Therefore, a value for each SPARROW watershed needed to be estimated by using landscape data that were spatially continuous across the region. This was done by combining data describing surface geology (Schruben *et al.*, 1997) and USEPA level 4 ecoregion (Plate 1) (USEPA, 2008). The different surficial geologic materials were presumed to have different phosphorus contents (because of different mineral compositions) and the different USEPA level 4 ecoregions were presumed to have different potential for weathering of surficial geologic material (because of differences in geology, physiography, vegetation, climate, hydrology, terrestrial and aquatic fauna, and soil). We developed a layer of “geo-eco regions,” calculated an average concentration of phosphorus for each geo-eco region from the available bed sediment data (expressed in parts per million), and calculated a value for each SPARROW watershed by using a weighted average for each geo-eco region in that watershed.

[Plate 1. U.S. EPA Level 3 and Level 4 Ecoregions in the United States Pacific Northwest.](#)

### ***Calibration Results***

Figures S15 – S22 compare predicted stream loads to measured stream loads, predicted stream loads to model residuals, and predicted yields to model residuals.

[Figure S15. Measured Stream Load Relative to Predicted Stream Load for the Total Nitrogen SPARROW Model Developed for the United States Pacific Northwest.](#)

Figure S16. Residual Stream Load Relative to Stream Predicted Load to for the Total Nitrogen SPARROW Model Developed for the United States Pacific Northwest.

Figure S17. Residual Stream Load Relative to Predicted Yield for the Total Nitrogen SPARROW Model Developed for the United States Pacific Northwest.

Figure S18. Probability Plot of Standardized Residual Stream Load for the Total Nitrogen SPARROW Model Developed for the United States Pacific Northwest.

Figure S19. Measured Stream Load Relative to Predicted Stream Load for the Total Phosphorous SPARROW Model Developed for the United States Pacific Northwest.

Figure S20. Residual Stream Load Relative to Predicted Stream Load for the Total Phosphorous SPARROW Model Developed for the United States Pacific Northwest.

Figure S21. Residual Stream Load Relative to Predicted Yield for the Total Phosphorous SPARROW Model Developed for the United States Pacific Northwest.

Figure S22. Probability Plot of Standardized Residual Stream Load for the Total Phosphorous SPARROW Model Developed for the United States Pacific Northwest.

### ***Prediction Results***

Table S3 provides details for each of the regional and national studies that we compared to our predicted yields for watersheds dominated by different land cover types.

Table S2. Details for Regional and National Nutrient Yield Estimates.

Tables S3 – S5 show the SPARROW estimates of nutrient enrichment and a summary of nutrient-related 303(d) listings for each HUC8 watershed in the PNW.

Table S3. Estimation of Nutrient Enrichment and Summary of State 303(d) Listings Because of Impairment Related to Nutrient Enrichment within the Columbia River Basin.

Table S4. Estimation of Nutrient Enrichment and Summary of State 303(d) Listings Because of Impairment Related to Nutrient Enrichment within the Snake River Basin.

Table S5. Estimation of Nutrient Enrichment and Summary of State 303(d) Listings Because of Impairment Related to Nutrient Enrichment within the Puget Sound Basin, the Coast Ranges of Washington and Oregon Draining Directly to the Pacific Ocean, and the Closed Basins of Oregon.

## **Literature Cited**

- Alexander, R.B., Smith, R.A. Schwarz, G.E., Preston, S.D., Brakebill, J.W., Srinivasan, R., and Pacheco, P.A., 2001, Atmospheric Nitrogen Flux from the Watersheds of Major Estuaries of the United States: An Application of the SPARROW Watershed Model, In: Nitrogen Loading in Coastal Water Bodies: An Atmospheric Perspective, American Geophysical Union Monograph 57, Richard Valigura, Richard Alexander, Mark Castro, Tilden Meyers, Hans Paerl, Paul Stacey, and R. Eugene Turner (eds.) pp. 119-170.
- Beaulac, M.N and K.H. Rechow, 1982. An Examination of Land Use – Nutrient Export Relationships. Water Resources Bulletin 18(6):1013-1024.
- Brakebill, J.W., D.M. Wolock, and S.E. Terziotti, 2011. Digital Hydrologic Networks Supporting Applications Related To Spatially Referenced Regression Modeling. Journal of the American Water Resources Association. This issue.
- Brown, C.A. and R.J. Ozretich, 2009. Coupling Between the Coastal Ocean and Yaquina Bay, Oregon: Importance of Oceanic Inputs Relative to Other Nitrogen Sources. Estuaries and Coasts 33:87-117.

- Brown, G.W., A.R. Gahler, and R.B. Marston, 1973. Nutrient Losses after Clear-Cut Logging and Slash Burning in the Oregon Coast Range. *Water Resources Research* 9(5): 1450-1453.
- California Environmental Protection Agency, 2002. California's 2002 CWA Section 303(d) List of Water Quality Limited Segments.  
[http://www.waterboards.ca.gov/water\\_issues/programs/tmdl/303d\\_lists.shtml](http://www.waterboards.ca.gov/water_issues/programs/tmdl/303d_lists.shtml), *accessed* March 17, 2009.
- Compton, J.A., M.R. Church, S.T. Larned, and W.E. Hogsett, 2003. Nitrogen Export from Forested Watersheds in the Oregon Coast Range: The Role of N<sub>2</sub>-fixing Red Alder. *Ecosystems* 6:773-785.
- Edmonds, R.L., T.B. Thomas, and R.D. Blew, 1995. Biogeochemistry of an Old-Growth Forested Watershed, Olympic National Park, Washington. *Water Resources Bulletin* 31(3):409-419.
- Embrey, S.S., and E.L. Inkpen, 1998, Nutrient Transport in Rivers of the Puget Sound Basin, Washington 1980-1993: U.S. Geological Survey Water-Resources Investigation Report 97-4270, 30 p.
- Gravelle, J.A., G. Ice, T.E. Link, and D.L Cook, 2009. Nutrient Concentration Dynamics in an Inland Pacific Northwest Watershed Before and after Timber Harvest. *Forest Ecology and Management* 257:1663-1675.
- Homer, C. C. Huang, L. Yang, B. Wylie and M. Coan. 2004. Development of a 2001 National Landcover Database for the United States. *Photogrammetric Engineering and Remote Sensing*, 70: 829-840.
- Idaho Department of Environmental Quality, 2002. Idaho Integrated §303(d)/§305(b) Report (2002).



[http://www.deq.state.id.us/water/data\\_reports/surface\\_water/monitoring/integrated\\_report.cfm](http://www.deq.state.id.us/water/data_reports/surface_water/monitoring/integrated_report.cfm), *accessed* March 17, 2009.

LEMMA (Landscape, Ecology, Modeling, Mapping and Analysis), 2008. Interagency Mapping and Assessment Project).

[http://www.fsl.orst.edu/lemma/main.php?project=common&id=mr&model\\_region=9&ref=imap](http://www.fsl.orst.edu/lemma/main.php?project=common&id=mr&model_region=9&ref=imap), *accessed* August 27, 2008.

Martin, C.W. and R.D. Harr, 1988. Precipitation and Streamwater Chemistry from Undisturbed Watersheds in the Cascade Mountains of Oregon. *Water, Air, and Soil Pollution* 42:203-219.

Montana Department of Environmental Quality, 2002. Montana 303(d) Information (2002).

<http://cwaic.mt.gov/query.aspx>, *accessed* March 17, 2009.

Nevada Division of Environmental Protection, 2004. Nevada's 303(d) Impaired Waters List (2004). <http://ndep.nv.gov/BWQP/303DLIST.HTM>, *accessed* March 17, 2009.

Oregon Department of Environmental Quality, 2002. Water Quality Assessment of Oregon (2002). <http://www.deq.state.or.us/wq/assessment/assessment.htm>, *accessed* March 17, 2009.

Preston, S.D., R.B. Alexander, M.D. Woodside, and P.A. Hamilton, 2009. SPARROW Modeling —Enhancing Understanding of the Nation's Water Quality: U.S. Geological Survey Fact Sheet 2009–3019, 6 p.

Schaefer, S.C and J.T. Hollibaugh, 2009. Watershed Nitrogen Input and Riverine Export on the West Coast of the U.S. *Biogeochemistry* 92: 219-233.

Schruben, P.G., R.E. Arndt, and W.J. Bawiec, 1997. Geology of the Conterminous United States at 1:2,500,000 Scale — A Digital Representation of the 1974 P.B. King and H.M. Beikman Map: U.S. Geological Survey Digital Data Series DDS-11, available at <http://pubs.usgs.gov/dds/dds11/kb.html>, *accessed* September 15, 2008.

USEPA (U.S. Environmental Protection Agency), 2008. Level IV Ecoregions of the Conterminous United States. U.S. Environmental Protection Agency, Western Ecology Division. [http://www.epa.gov/wed/pages/ecoregions/level\\_iv.htm](http://www.epa.gov/wed/pages/ecoregions/level_iv.htm), accessed September 17, 2008.

USGS (United States Geological Survey), 2004. The National Geochemical Survey - Database and Documentation: U.S. Geological Survey Open-File Report 2004-1001. <http://tin.er.usgs.gov/geochem/>, accessed August 1, 2008.

Utah Department of Environmental Quality, 2006. Utah's 2006 Integrated Report: Volume II – 303(d) List of Impaired Streams. [http://www.waterquality.utah.gov/documents/200\\_303d\\_submittal\\_3-31-06.pdf](http://www.waterquality.utah.gov/documents/200_303d_submittal_3-31-06.pdf), accessed March 17, 2009.

Vanderbilt, K.S., Kate Lajtha, and F.J. Swanson, 2003. Biogeochemistry of Unpolluted Forested Watersheds in the Oregon Cascades: Temporal Patterns of Precipitation and Stream Nitrogen Fluxes. *Biogeochemistry* 62:87-117.

Washington Department of Ecology, 2002. Water Quality Assessment of Washington (2002). <http://apps.ecy.wa.gov/wqawa2008/viewer.htm>, accessed March 17, 2009.

Wyoming Department of Environmental Quality, 2002. Wyoming Watershed Program 303d list (2002). <http://deq.state.wy.us/wqd/watershed/Downloads/TMDL/2-2227-doc.pdf>, accessed March 17, 2009.

| State                                     | Date of 303(d) listings | Primary chemical indicators                                       | Secondary chemical indicators | Biological indicators       | Number of reaches | Total length of reaches (km) |
|-------------------------------------------|-------------------------|-------------------------------------------------------------------|-------------------------------|-----------------------------|-------------------|------------------------------|
| California <sup>1</sup>                   | 2002                    | na                                                                | na                            | na                          | 0                 | 0                            |
| Idaho <sup>2</sup>                        | 2002                    | nutrients, nitrogen, phosphorus                                   | dissolved oxygen, pH          | none                        | 358               | 4,160                        |
| Montana <sup>3</sup>                      | 2002                    | nutrients, nitrate, nitrogen                                      | dissolved oxygen              | algal growth, chlorophyll a | 150               | 1,305                        |
| Nevada <sup>4</sup>                       | 2004                    | total phosphorus                                                  | dissolved oxygen, pH          | none                        | 29                | 152                          |
| Oregon <sup>5</sup>                       | 2002                    | nitrate, phosphorus                                               | dissolved oxygen, pH          | algae, aquatic weeds        | 378               | 3,405                        |
| Utah <sup>6</sup>                         | 2006                    | na                                                                | na                            | na                          | 0                 | 0                            |
| Washington <sup>7</sup>                   | 2008                    | total nitrogen, total phosphorus                                  | dissolved oxygen, pH          | none                        | 321               | 4,194                        |
| Wyoming <sup>8</sup>                      | 2002                    | na                                                                | na                            | na                          | 0                 | 0                            |
| Oregon-Washington border (Columbia River) | 2002                    | total nitrogen, nitrate, total phosphorus, phosphorus             | dissolved oxygen, pH          | algae, aquatic weeds        | 29                | 264                          |
| Oregon-Idaho border (Snake River)         | 2002                    | nutrients, nitrogen, nitrates, phosphorus                         | dissolved oxygen, pH          | algae, aquatic weeds        | 37                | 376                          |
| Washington-Idaho border (Snake River)     | 2002                    | nutrients, total nitrogen, nitrogen, total phosphorus, phosphorus | dissolved oxygen, pH          | none                        | 3                 | 24                           |

Notes:

na: not applicable, since there were no 303(d) listed streams for the state in the modeling region.

km: kilometers

<sup>1</sup>California Environmental Protection Agency, 2002

<sup>2</sup>Idaho Department of Environmental Quality, 2002

<sup>3</sup>Montana Department of Environmental Quality, 2002

<sup>4</sup>Nevada Division of Environmental Protection, 2004

<sup>5</sup>Oregon Department of Environmental Quality, 2002

<sup>6</sup>Utah Department of Environmental Quality, 2006

<sup>7</sup>Washington Department of Ecology, 2002

<sup>8</sup>Wyoming Department of Environmental Quality, 2002

Table S2. Details for Regional and National Nutrient Yield Estimates.

| Data Source                     | Description of Results                                                                                                      |
|---------------------------------|-----------------------------------------------------------------------------------------------------------------------------|
| Alexander <i>et al.</i> , 2001  | Median TN yields estimated by SPARROW for watersheds across the nation having more than 90% crop land and 85% pasture land. |
|                                 | Median TN yields estimated by SPARROW for watersheds across the nation having more than 95% forest land.                    |
|                                 | Median TN yields estimated by SPARROW for watersheds across the nation having more than 75% urban land.                     |
|                                 | Median TN yields estimated by SPARROW for watersheds across the nation having 100% range land.                              |
| Beaulac and Rechow, 1982        | Median TN and TP export for mixed agricultural land across the U.S.                                                         |
|                                 | Median TN and TP export for pasture and range land across the U.S.                                                          |
|                                 | Median TN and TP for urban land across the U.S.                                                                             |
| Brown <i>et al.</i> , 1973      | Median NO <sub>3</sub> -N export from watersheds in the Alsea R. basin (Oregon).                                            |
| Brown and Ozretich, 2009        | Riverine N export to Yaquina Bay (Oregon).                                                                                  |
| Compton <i>et al.</i> , 2003    | Average N export from watersheds within the Salmon R. basin (Oregon).                                                       |
| Edmunds <i>et al.</i> , 1995    | TN and TP export from West Twin Creek watershed (Washington).                                                               |
| Embrey and Inkpen , 1998        | Average inorganic N and TP export from three primarily agricultural basins draining to Puget Sound (Washington).            |
|                                 | Inorganic N and TP export from a primarily forested basin draining to Puget Sound (Washington).                             |
|                                 | Average inorganic N and TP export from two primarily urban basins draining to Puget Sound (Washington).                     |
| Gravelle <i>et al.</i> , 2009   | Average NO <sub>3</sub> /NO <sub>2</sub> -N export from regenerated subwatersheds within the Mica Creek basin (Idaho).      |
|                                 | Average NO <sub>3</sub> /NO <sub>2</sub> -N export from clearcut subwatersheds within the Mica Creek basin (Idaho).         |
| Martin and Harr, 1988           | Nitrate-N and Phosphate-P export from an undisturbed forested watershed in the Oregon Cascades.                             |
| Schaefer <i>et al.</i> , 2009   | TN export for 2002 from the Spokane River basin (Washington).                                                               |
|                                 | TN export for 1992 from the Nehalem River basin (Oregon).                                                                   |
| Vanderbilt <i>et al.</i> , 2003 | Average TN export from unpolluted watersheds in the Oregon Cascades.                                                        |
| Wise, 2004 (unpublished)        | TN and TP yields for small agricultural watersheds in the lower Yakima River Basin (Washington)                             |

Notes:

TN: total nitrogen.

TP: total phosphorus.

NO<sub>3</sub>-N: nitrate, as nitrogen

N: nitrogen

NO<sub>3</sub>/NO<sub>2</sub>-N: nitrate plus nitrate, as nitrogen.

Phosphate-P: phosphate, as phosphorus.

SPARROW: Spatially Referenced Regressions on Watershed Attributes model.

Table S3. Estimation of Nutrient Enrichment and Summary of State 303(d) Listings Because of Impairment Related to Nutrient Enrichment within the Columbia River Basin.

| Six-Digit Hydrologic Unit Code (HUC6 )Watershed |                      | Eight-Digit Hydrologic Unit Code (HUC8) Watershed |                              | Percentage of stream reach length where the probability of exceeding the suggested USEPA TN criterion was greater than 90% | Percentage of stream reach length where the probability of exceeding the suggested USEPA TP criterion was greater than 90% | Percentage of stream reach length that is placed on state 303(d) lists because of impairment related to nutrient enrichment |
|-------------------------------------------------|----------------------|---------------------------------------------------|------------------------------|----------------------------------------------------------------------------------------------------------------------------|----------------------------------------------------------------------------------------------------------------------------|-----------------------------------------------------------------------------------------------------------------------------|
| 170101                                          | Kootenai River       | 17010101                                          | Upper Kootenai               | 82.0                                                                                                                       | 71.3                                                                                                                       | 3.6                                                                                                                         |
|                                                 |                      | 17010102                                          | Fisher                       | 70.5                                                                                                                       | 36.0                                                                                                                       | 12.6                                                                                                                        |
|                                                 |                      | 17010103                                          | Yaak                         | 70.4                                                                                                                       | 65.6                                                                                                                       | 0.0                                                                                                                         |
|                                                 |                      | 17010104                                          | Lower Kootenai               | 44.4                                                                                                                       | 22.0                                                                                                                       | 0.0                                                                                                                         |
|                                                 |                      | 17010105                                          | Moyie                        | 72.9                                                                                                                       | 18.6                                                                                                                       | 0.0                                                                                                                         |
| 170102                                          | Pend Oreille River   | 17010201                                          | Upper Clark Fork             | 97.1                                                                                                                       | 55.3                                                                                                                       | 35.7                                                                                                                        |
|                                                 |                      | 17010202                                          | Flint-Rock                   | 84.0                                                                                                                       | 58.0                                                                                                                       | 4.0                                                                                                                         |
|                                                 |                      | 17010203                                          | Blackfoot                    | 72.3                                                                                                                       | 41.7                                                                                                                       | 14.5                                                                                                                        |
|                                                 |                      | 17010204                                          | Middle Clark Fork            | 53.2                                                                                                                       | 55.6                                                                                                                       | 21.1                                                                                                                        |
|                                                 |                      | 17010205                                          | Bitterroot                   | 28.8                                                                                                                       | 29.4                                                                                                                       | 13.1                                                                                                                        |
|                                                 |                      | 17010206                                          | North Fork Flathead          | 45.1                                                                                                                       | 51.6                                                                                                                       | 0.0                                                                                                                         |
|                                                 |                      | 17010207                                          | Middle Fork Flathead         | 18.9                                                                                                                       | 25.9                                                                                                                       | 0.0                                                                                                                         |
|                                                 |                      | 17010208                                          | Flathead Lake                | 30.4                                                                                                                       | 11.6                                                                                                                       | 0.0                                                                                                                         |
|                                                 |                      | 17010209                                          | South Fork Flathead          | 48.2                                                                                                                       | 46.2                                                                                                                       | 0.0                                                                                                                         |
|                                                 |                      | 17010210                                          | Stillwater                   | 86.9                                                                                                                       | 56.7                                                                                                                       | 24.9                                                                                                                        |
|                                                 |                      | 17010211                                          | Swan                         | 82.2                                                                                                                       | 68.7                                                                                                                       | 2.4                                                                                                                         |
|                                                 |                      | 17010212                                          | Lower Flathead               | 61.1                                                                                                                       | 55.4                                                                                                                       | 0.0                                                                                                                         |
|                                                 |                      | 17010213                                          | Lower Clark Fork             | 32.2                                                                                                                       | 45.3                                                                                                                       | 2.0                                                                                                                         |
|                                                 |                      | 17010214                                          | Pend Oreille Lake            | 56.2                                                                                                                       | 67.7                                                                                                                       | 9.5                                                                                                                         |
|                                                 |                      | 17010215                                          | Priest                       | 31.2                                                                                                                       | 65.0                                                                                                                       | 0.0                                                                                                                         |
|                                                 |                      | 17010216                                          | Pend Oreille                 | 58.2                                                                                                                       | 67.1                                                                                                                       | 69.9                                                                                                                        |
| 170103                                          | Spokane River        | 17010301                                          | Upper Coeur D'alene          | 3.2                                                                                                                        | 3.2                                                                                                                        | 0.0                                                                                                                         |
|                                                 |                      | 17010302                                          | South Fork Coeur D'alene     | 21.7                                                                                                                       | 61.5                                                                                                                       | 0.0                                                                                                                         |
|                                                 |                      | 17010303                                          | Coeur D'alene Lake           | 40.2                                                                                                                       | 60.8                                                                                                                       | 0.8                                                                                                                         |
|                                                 |                      | 17010304                                          | St. Joe                      | 31.0                                                                                                                       | 40.6                                                                                                                       | 1.3                                                                                                                         |
|                                                 |                      | 17010305                                          | Upper Spokane                | 5.0                                                                                                                        | 20.1                                                                                                                       | 44.0                                                                                                                        |
|                                                 |                      | 17010306                                          | Hangman                      | 100.0                                                                                                                      | 100.0                                                                                                                      | 34.6                                                                                                                        |
|                                                 |                      | 17010307                                          | Lower Spokane                | 71.0                                                                                                                       | 76.8                                                                                                                       | 16.1                                                                                                                        |
|                                                 |                      | 17010308                                          | Little Spokane               | 100.0                                                                                                                      | 100.0                                                                                                                      | 64.8                                                                                                                        |
| 170300                                          | Yakima River         | 17030001                                          | Upper Yakima                 | 36.5                                                                                                                       | 60.3                                                                                                                       | 10.8                                                                                                                        |
|                                                 |                      | 17030002                                          | Naches                       | 71.6                                                                                                                       | 80.1                                                                                                                       | 13.9                                                                                                                        |
|                                                 |                      | 17030003                                          | Lower Yakima                 | 35.8                                                                                                                       | 76.0                                                                                                                       | 14.7                                                                                                                        |
| Snake River (see table S5)                      |                      |                                                   |                              |                                                                                                                            |                                                                                                                            |                                                                                                                             |
| 170200                                          | Upper Columbia River | 17020001                                          | Franklin D. Roosevelt Lake   | 72.9                                                                                                                       | 73.7                                                                                                                       | 10.4                                                                                                                        |
|                                                 |                      | 17020002                                          | Kettle                       | 88.0                                                                                                                       | 79.0                                                                                                                       | 8.4                                                                                                                         |
|                                                 |                      | 17020003                                          | Colville                     | 100.0                                                                                                                      | 100.0                                                                                                                      | 11.2                                                                                                                        |
|                                                 |                      | 17020004                                          | Sanpoil                      | 4.7                                                                                                                        | 4.7                                                                                                                        | 7.4                                                                                                                         |
|                                                 |                      | 17020005                                          | Chief Joseph                 | 3.4                                                                                                                        | 3.4                                                                                                                        | 0.7                                                                                                                         |
|                                                 |                      | 17020006                                          | Okanogan                     | 40.3                                                                                                                       | 44.7                                                                                                                       | 22.6                                                                                                                        |
|                                                 |                      | 17020007                                          | Similkameen                  | 3.0                                                                                                                        | 1.1                                                                                                                        | 6.9                                                                                                                         |
|                                                 |                      | 17020008                                          | Methow                       | 14.2                                                                                                                       | 55.2                                                                                                                       | 0.0                                                                                                                         |
|                                                 |                      | 17020009                                          | Lake Chelan                  | 0.0                                                                                                                        | 8.5                                                                                                                        | 3.9                                                                                                                         |
|                                                 |                      | 17020010                                          | Upper Columbia-Entiat        | 7.4                                                                                                                        | 10.2                                                                                                                       | 1.6                                                                                                                         |
|                                                 |                      | 17020011                                          | Wenatchee                    | 1.0                                                                                                                        | 14.5                                                                                                                       | 16.2                                                                                                                        |
|                                                 |                      | 17020012                                          | Moses Coulee                 | 0.0                                                                                                                        | 0.0                                                                                                                        | 0.0                                                                                                                         |
|                                                 |                      | 17020013                                          | Upper Crab                   | 100.0                                                                                                                      | 100.0                                                                                                                      | 30.3                                                                                                                        |
|                                                 |                      | 17020014                                          | Banks Lake                   | 100.0                                                                                                                      | 100.0                                                                                                                      | 0.9                                                                                                                         |
|                                                 |                      | 17020015                                          | Lower Crab                   | 88.5                                                                                                                       | 84.7                                                                                                                       | 66.7                                                                                                                        |
|                                                 |                      | 17020016                                          | Upper Columbia-Priest Rapids | 0.0                                                                                                                        | 36.0                                                                                                                       | 32.5                                                                                                                        |

Table S3 con't. Estimation of Nutrient Enrichment and Summary of State 303(d) Listings Because of Impairment Related to Nutrient Enrichment within the Columbia River Basin.

| Six-Digit Hydrologic Unit Code (HUC6 Watershed) |                      | Eight-Digit Hydrologic Unit Code (UUC8) Watershed |                              | Percentage of stream reach length where the probability of exceeding the suggested USEPA TN criterion was greater than 90% | Percentage of stream reach length where the probability of exceeding the suggested USEPA TP criterion was greater than 90% | Percentage of stream reach length that is placed on state 303(d) lists because of impairment related to nutrient enrichment |
|-------------------------------------------------|----------------------|---------------------------------------------------|------------------------------|----------------------------------------------------------------------------------------------------------------------------|----------------------------------------------------------------------------------------------------------------------------|-----------------------------------------------------------------------------------------------------------------------------|
| 170702                                          | John Day River       | 17070201                                          | Upper John Day               | 91.6                                                                                                                       | 100.0                                                                                                                      | 13.4                                                                                                                        |
|                                                 |                      | 17070202                                          | North Fork John Day          | 90.6                                                                                                                       | 96.6                                                                                                                       | 0.0                                                                                                                         |
|                                                 |                      | 17070203                                          | Middle Fork John Day         | 59.2                                                                                                                       | 100.0                                                                                                                      | 0.0                                                                                                                         |
|                                                 |                      | 17070204                                          | Lower John Day               | 25.0                                                                                                                       | 77.9                                                                                                                       | 0.4                                                                                                                         |
| 170703                                          | Deschutes River      | 17070301                                          | Upper Deschutes              | 65.8                                                                                                                       | 81.8                                                                                                                       | 22.4                                                                                                                        |
|                                                 |                      | 17070302                                          | Little Deschutes             | 100.0                                                                                                                      | 100.0                                                                                                                      | 20.9                                                                                                                        |
|                                                 |                      | 17070303                                          | Beaver-South Fork            | 18.0                                                                                                                       | 79.2                                                                                                                       | 0.0                                                                                                                         |
|                                                 |                      | 17070304                                          | Upper Crooked                | 36.5                                                                                                                       | 88.7                                                                                                                       | 7.0                                                                                                                         |
|                                                 |                      | 17070305                                          | Lower Crooked                | 76.2                                                                                                                       | 86.3                                                                                                                       | 18.1                                                                                                                        |
|                                                 |                      | 17070306                                          | Lower Deschutes              | 54.0                                                                                                                       | 72.3                                                                                                                       | 12.0                                                                                                                        |
|                                                 |                      | 17070307                                          | Trout                        | 12.8                                                                                                                       | 84.9                                                                                                                       | 0.0                                                                                                                         |
| 170701                                          | Middle Columbia      | 17070101                                          | Middle Columbia-Lake Wallula | 4.5                                                                                                                        | 11.1                                                                                                                       | 0.3                                                                                                                         |
|                                                 |                      | 17070102                                          | Walla Walla                  | 79.8                                                                                                                       | 100.0                                                                                                                      | 0.0                                                                                                                         |
|                                                 |                      | 17070103                                          | Umatilla                     | 36.8                                                                                                                       | 75.0                                                                                                                       | 5.5                                                                                                                         |
|                                                 |                      | 17070104                                          | Willow                       | 35.3                                                                                                                       | 73.3                                                                                                                       | 19.7                                                                                                                        |
|                                                 |                      | 17070105                                          | Middle Columbia-Hood         | 59.4                                                                                                                       | 47.9                                                                                                                       | 4.8                                                                                                                         |
|                                                 |                      | 17070106                                          | Klickitat                    | 63.1                                                                                                                       | 87.5                                                                                                                       | 0.0                                                                                                                         |
| 170900                                          | Willamette River     | 17090001                                          | Middle Fork Willamette       | 9.1                                                                                                                        | 74.6                                                                                                                       | 2.7                                                                                                                         |
|                                                 |                      | 17090002                                          | Coast Fork Willamette        | 20.3                                                                                                                       | 57.8                                                                                                                       | 3.6                                                                                                                         |
|                                                 |                      | 17090003                                          | Upper Willamette             | 53.1                                                                                                                       | 17.6                                                                                                                       | 10.5                                                                                                                        |
|                                                 |                      | 17090004                                          | McKenzie                     | 10.1                                                                                                                       | 74.0                                                                                                                       | 5.2                                                                                                                         |
|                                                 |                      | 17090005                                          | North Santiam                | 4.5                                                                                                                        | 60.4                                                                                                                       | 5.2                                                                                                                         |
|                                                 |                      | 17090006                                          | South Santiam                | 20.8                                                                                                                       | 59.7                                                                                                                       | 0.0                                                                                                                         |
|                                                 |                      | 17090007                                          | Middle Willamette            | 66.7                                                                                                                       | 21.7                                                                                                                       | 26.5                                                                                                                        |
|                                                 |                      | 17090008                                          | Yamhill                      | 74.8                                                                                                                       | 25.1                                                                                                                       | 10.2                                                                                                                        |
|                                                 |                      | 17090009                                          | Molalla-Pudding              | 90.9                                                                                                                       | 58.7                                                                                                                       | 0.0                                                                                                                         |
|                                                 |                      | 17090010                                          | Tualatin                     | 66.6                                                                                                                       | 30.7                                                                                                                       | 0.0                                                                                                                         |
|                                                 |                      | 17090011                                          | Clackamas                    | 29.9                                                                                                                       | 73.7                                                                                                                       | 0.0                                                                                                                         |
|                                                 |                      | 17090012                                          | Lower Willamette             | 78.3                                                                                                                       | 41.7                                                                                                                       | 10.5                                                                                                                        |
| 170800                                          | Lower Columbia River | 17080001                                          | Lower Columbia-Sandy         | 35.4                                                                                                                       | 56.7                                                                                                                       | 26.4                                                                                                                        |
|                                                 |                      | 17080002                                          | Lewis                        | 26.8                                                                                                                       | 71.9                                                                                                                       | 0.0                                                                                                                         |
|                                                 |                      | 17080003                                          | Lower Columbia-Clatskanie    | 91.9                                                                                                                       | 86.8                                                                                                                       | 21.5                                                                                                                        |
|                                                 |                      | 17080004                                          | Upper Cowlitz                | 3.7                                                                                                                        | 23.8                                                                                                                       | 0.1                                                                                                                         |
|                                                 |                      | 17080005                                          | Lower Cowlitz                | 54.2                                                                                                                       | 69.3                                                                                                                       | 0.0                                                                                                                         |
|                                                 |                      | 17080006                                          | Lower Columbia               | 99.4                                                                                                                       | 96.1                                                                                                                       | 30.5                                                                                                                        |

Table S4. Estimation of Nutrient Enrichment and Summary of State 303(d) Listings Because of Impairment Related to Nutrient Enrichment within the Snake River Basin.

| Six-Digit Hydrologic Unit Code (HUC6)<br>Watershed |                                 | Eight-Digit Hydrologic Unit Code (HUC8)<br>Watershed |                                 | Percentage of<br>stream reach<br>length where the<br>probability of<br>exceeding the<br>suggested USEPA<br>TN criterion was<br>greater than 90% | Percentage of<br>stream reach<br>length where the<br>probability of<br>exceeding the<br>suggested USEPA<br>TP criterion was<br>greater than 90% | Percentage of<br>stream reach<br>length that is<br>placed on state<br>303(d) lists<br>because of<br>impairment related<br>to nutrient<br>enrichment |
|----------------------------------------------------|---------------------------------|------------------------------------------------------|---------------------------------|-------------------------------------------------------------------------------------------------------------------------------------------------|-------------------------------------------------------------------------------------------------------------------------------------------------|-----------------------------------------------------------------------------------------------------------------------------------------------------|
| 170401                                             | Snake River<br>Headwaters       | 17040101                                             | Snake Headwaters                | 32.1                                                                                                                                            | 95.5                                                                                                                                            | 0.0                                                                                                                                                 |
|                                                    |                                 | 17040102                                             | Gros Ventre                     | 35.2                                                                                                                                            | 82.5                                                                                                                                            | 0.0                                                                                                                                                 |
|                                                    |                                 | 17040103                                             | Greys-Hobock                    | 10.8                                                                                                                                            | 65.5                                                                                                                                            | 0.0                                                                                                                                                 |
|                                                    |                                 | 17040104                                             | Pallisades                      | 46.0                                                                                                                                            | 97.7                                                                                                                                            | 0.0                                                                                                                                                 |
|                                                    |                                 | 17040105                                             | Salt                            | 73.0                                                                                                                                            | 100.0                                                                                                                                           | 3.5                                                                                                                                                 |
| 170402                                             | Upper Snake River               | 17040201                                             | Idaho Falls                     | 32.3                                                                                                                                            | 43.2                                                                                                                                            | 0.0                                                                                                                                                 |
|                                                    |                                 | 17040202                                             | Upper Henry's                   | 60.2                                                                                                                                            | 78.8                                                                                                                                            | 0.0                                                                                                                                                 |
|                                                    |                                 | 17040203                                             | Lower Henry's                   | 53.0                                                                                                                                            | 63.5                                                                                                                                            | 0.0                                                                                                                                                 |
|                                                    |                                 | 17040204                                             | Teton                           | 45.3                                                                                                                                            | 72.9                                                                                                                                            | 7.5                                                                                                                                                 |
|                                                    |                                 | 17040205                                             | Willow                          | 72.0                                                                                                                                            | 100.0                                                                                                                                           | 13.4                                                                                                                                                |
|                                                    |                                 | 17040206                                             | American Falls                  | 58.3                                                                                                                                            | 72.3                                                                                                                                            | 30.4                                                                                                                                                |
|                                                    |                                 | 17040207                                             | Blackfoot                       | 29.8                                                                                                                                            | 91.0                                                                                                                                            | 0.0                                                                                                                                                 |
|                                                    |                                 | 17040208                                             | Portneuf                        | 65.8                                                                                                                                            | 99.0                                                                                                                                            | 9.0                                                                                                                                                 |
|                                                    |                                 | 17040209                                             | Lake Walcott                    | 45.5                                                                                                                                            | 72.6                                                                                                                                            | 0.0                                                                                                                                                 |
|                                                    |                                 | 17040210                                             | Raft                            | 71.4                                                                                                                                            | 94.1                                                                                                                                            | 20.7                                                                                                                                                |
|                                                    |                                 | 17040211                                             | Goose                           | 16.2                                                                                                                                            | 91.1                                                                                                                                            | 9.0                                                                                                                                                 |
|                                                    |                                 | 17040212                                             | Upper Snake-Rock                | 54.6                                                                                                                                            | 76.5                                                                                                                                            | 28.8                                                                                                                                                |
|                                                    |                                 | 17040213                                             | Salmon Falls                    | 9.2                                                                                                                                             | 98.1                                                                                                                                            | 16.5                                                                                                                                                |
|                                                    |                                 | 17040214                                             | Beaver-Camas                    | 82.2                                                                                                                                            | 100.0                                                                                                                                           | 35.6                                                                                                                                                |
|                                                    |                                 | 17040215                                             | Medicine Lodge                  | 51.6                                                                                                                                            | 90.6                                                                                                                                            | 0.7                                                                                                                                                 |
|                                                    |                                 | 17040216                                             | Birch                           | 61.7                                                                                                                                            | 100.0                                                                                                                                           | 11.7                                                                                                                                                |
|                                                    |                                 | 17040217                                             | Little Lost                     | 87.5                                                                                                                                            | 100.0                                                                                                                                           | 0.2                                                                                                                                                 |
|                                                    |                                 | 17040218                                             | Big Lost                        | 17.4                                                                                                                                            | 80.2                                                                                                                                            | 17.5                                                                                                                                                |
|                                                    |                                 | 17040219                                             | Big Wood                        | 9.7                                                                                                                                             | 62.5                                                                                                                                            | 10.8                                                                                                                                                |
|                                                    |                                 | 17040220                                             | Camas                           | 2.1                                                                                                                                             | 92.3                                                                                                                                            | 2.3                                                                                                                                                 |
|                                                    |                                 | 17040221                                             | Little Wood                     | 5.6                                                                                                                                             | 48.2                                                                                                                                            | 38.5                                                                                                                                                |
| 170501                                             | Middle Snake - Boise<br>Rivers  | 17050101                                             | C.J. Idaho                      | 33.4                                                                                                                                            | 55.0                                                                                                                                            | 7.6                                                                                                                                                 |
|                                                    |                                 | 17050102                                             | Bruneau                         | 0.8                                                                                                                                             | 56.2                                                                                                                                            | 1.0                                                                                                                                                 |
|                                                    |                                 | 17050103                                             | Middle Snake-Succor             | 19.3                                                                                                                                            | 43.4                                                                                                                                            | 14.0                                                                                                                                                |
|                                                    |                                 | 17050104                                             | Upper Owyhee                    | 0.0                                                                                                                                             | 95.9                                                                                                                                            | 6.9                                                                                                                                                 |
|                                                    |                                 | 17050105                                             | South Fork Owyhee               | 4.4                                                                                                                                             | 93.3                                                                                                                                            | 0.0                                                                                                                                                 |
|                                                    |                                 | 17050106                                             | East Little Owyhee              | 0.0                                                                                                                                             | 100.0                                                                                                                                           | 0.0                                                                                                                                                 |
|                                                    |                                 | 17050107                                             | Middle Owyhee                   | 3.7                                                                                                                                             | 86.5                                                                                                                                            | 2.8                                                                                                                                                 |
|                                                    |                                 | 17050108                                             | Jordan                          | 18.3                                                                                                                                            | 99.3                                                                                                                                            | 2.6                                                                                                                                                 |
|                                                    |                                 | 17050109                                             | Crooked-Rattlesnake             | 5.1                                                                                                                                             | 92.7                                                                                                                                            | 0.0                                                                                                                                                 |
|                                                    |                                 | 17050110                                             | Lower Owyhee                    | 8.9                                                                                                                                             | 98.6                                                                                                                                            | 10.1                                                                                                                                                |
|                                                    |                                 | 17050111                                             | North and Middle Forks<br>Boise | 0.0                                                                                                                                             | 55.1                                                                                                                                            | 0.0                                                                                                                                                 |
|                                                    |                                 | 17050112                                             | Boise-Mores                     | 2.7                                                                                                                                             | 53.5                                                                                                                                            | 0.0                                                                                                                                                 |
|                                                    |                                 | 17050113                                             | South Fork Boise                | 0.0                                                                                                                                             | 14.5                                                                                                                                            | 0.0                                                                                                                                                 |
|                                                    |                                 | 17050114                                             | Lower Boise                     | 62.5                                                                                                                                            | 80.6                                                                                                                                            | 67.3                                                                                                                                                |
|                                                    |                                 | 17050115                                             | Middle Snake-Payette            | 72.8                                                                                                                                            | 72.8                                                                                                                                            | 35.6                                                                                                                                                |
|                                                    |                                 | 17050116                                             | Upper Malheur                   | 45.6                                                                                                                                            | 100.0                                                                                                                                           | 0.0                                                                                                                                                 |
|                                                    |                                 | 17050117                                             | Lower Malheur                   | 22.4                                                                                                                                            | 100.0                                                                                                                                           | 19.4                                                                                                                                                |
|                                                    |                                 | 17050118                                             | Bully                           | 10.1                                                                                                                                            | 100.0                                                                                                                                           | 3.5                                                                                                                                                 |
|                                                    |                                 | 17050119                                             | Willow                          | 57.4                                                                                                                                            | 98.6                                                                                                                                            | 8.1                                                                                                                                                 |
|                                                    |                                 | 17050120                                             | South Fork Payette              | 0.0                                                                                                                                             | 5.2                                                                                                                                             | 0.0                                                                                                                                                 |
|                                                    |                                 | 17050121                                             | Middle Fork Payette             | 0.0                                                                                                                                             | 0.0                                                                                                                                             | 0.0                                                                                                                                                 |
|                                                    |                                 | 17050122                                             | Payette                         | 0.6                                                                                                                                             | 18.2                                                                                                                                            | 20.2                                                                                                                                                |
|                                                    |                                 | 17050123                                             | North Fork Payette              | 0.0                                                                                                                                             | 0.0                                                                                                                                             | 35.4                                                                                                                                                |
|                                                    |                                 | 17050124                                             | Weiser                          | 22.9                                                                                                                                            | 79.8                                                                                                                                            | 30.0                                                                                                                                                |
| 170502                                             | Middle Snake - Powder<br>Rivers | 17050201                                             | Brownlee Reservoir              | 78.6                                                                                                                                            | 92.7                                                                                                                                            | 30.7                                                                                                                                                |
|                                                    |                                 | 17050202                                             | Burnt                           | 73.1                                                                                                                                            | 100.0                                                                                                                                           | 8.2                                                                                                                                                 |
|                                                    |                                 | 17050203                                             | Powder                          | 78.4                                                                                                                                            | 97.6                                                                                                                                            | 11.6                                                                                                                                                |

Table S4 con't. Estimation of Nutrient Enrichment and Summary of State 303(d) Listings Because of Impairment Related to Nutrient Enrichment within the Snake River Basin.

| Six-Digit Hydrologic Unit Code (HUC6) Watershed |                   | Eight-Digit Hydrologic Unit Code (HUC8) Watershed |                             | Percentage of stream reach length where the probability of exceeding the suggested USEPA TN criterion was greater than 90% | Percentage of stream reach length where the probability of exceeding the suggested USEPA TP criterion was greater than 90% | Percentage of stream reach length that is placed on state 303(d) lists because of impairment related to nutrient enrichment |
|-------------------------------------------------|-------------------|---------------------------------------------------|-----------------------------|----------------------------------------------------------------------------------------------------------------------------|----------------------------------------------------------------------------------------------------------------------------|-----------------------------------------------------------------------------------------------------------------------------|
| 170602                                          | Salmon River      | 17060201                                          | Upper Selway                | 0.0                                                                                                                        | 32.6                                                                                                                       | 5.8                                                                                                                         |
|                                                 |                   | 17060202                                          | Pahsimeroi                  | 0.0                                                                                                                        | 67.3                                                                                                                       | 25.9                                                                                                                        |
|                                                 |                   | 17060203                                          | Middle Salmon-Panther       | 3.0                                                                                                                        | 19.4                                                                                                                       | 3.5                                                                                                                         |
|                                                 |                   | 17060204                                          | Lemhi                       | 69.7                                                                                                                       | 89.0                                                                                                                       | 6.3                                                                                                                         |
|                                                 |                   | 17060205                                          | Upper Middle Fork Salmon    | 0.0                                                                                                                        | 29.8                                                                                                                       | 0.0                                                                                                                         |
|                                                 |                   | 17060206                                          | Lower Middle Fork Salmon    | 0.0                                                                                                                        | 1.5                                                                                                                        | 0.0                                                                                                                         |
|                                                 |                   | 17060207                                          | Middle Salmon-Chamberlain   | 1.9                                                                                                                        | 15.3                                                                                                                       | 0.0                                                                                                                         |
|                                                 |                   | 17060208                                          | South Fork Salmon           | 0.0                                                                                                                        | 7.3                                                                                                                        | 0.0                                                                                                                         |
|                                                 |                   | 17060209                                          | Lower Salmon                | 19.4                                                                                                                       | 77.1                                                                                                                       | 8.6                                                                                                                         |
|                                                 |                   | 17060210                                          | Little Salmon               | 21.7                                                                                                                       | 55.7                                                                                                                       | 5.5                                                                                                                         |
| 170603                                          | Clearwater River  | 17060301                                          | Upper Selway                | 0.0                                                                                                                        | 0.0                                                                                                                        | 0.0                                                                                                                         |
|                                                 |                   | 17060302                                          | Lower Selway                | 0.0                                                                                                                        | 10.6                                                                                                                       | 0.0                                                                                                                         |
|                                                 |                   | 17060303                                          | Lochsa                      | 5.5                                                                                                                        | 2.3                                                                                                                        | 0.0                                                                                                                         |
|                                                 |                   | 17060304                                          | Middle Fork Clearwater      | 13.4                                                                                                                       | 38.2                                                                                                                       | 18.5                                                                                                                        |
|                                                 |                   | 17060305                                          | South Fork Clearwater       | 13.4                                                                                                                       | 34.0                                                                                                                       | 14.1                                                                                                                        |
|                                                 |                   | 17060306                                          | Clearwater                  | 66.0                                                                                                                       | 83.5                                                                                                                       | 40.2                                                                                                                        |
|                                                 |                   | 17060307                                          | Upper North Fork Clearwater | 24.2                                                                                                                       | 27.6                                                                                                                       | 0.0                                                                                                                         |
|                                                 |                   | 17060308                                          | Lower North Fork Clearwater | 11.8                                                                                                                       | 34.8                                                                                                                       | 4.7                                                                                                                         |
| 170601                                          | Lower Snake River | 17060101                                          | Hells Canyon                | 54.5                                                                                                                       | 89.8                                                                                                                       | 51.7                                                                                                                        |
|                                                 |                   | 17060102                                          | Imnaha                      | 67.0                                                                                                                       | 100.0                                                                                                                      | 0.0                                                                                                                         |
|                                                 |                   | 17060103                                          | Lower Snake-Asotin          | 41.7                                                                                                                       | 98.2                                                                                                                       | 5.7                                                                                                                         |
|                                                 |                   | 17060104                                          | Upper Grande Ronde          | 82.7                                                                                                                       | 96.7                                                                                                                       | 0.0                                                                                                                         |
|                                                 |                   | 17060105                                          | Wallowa                     | 52.4                                                                                                                       | 91.1                                                                                                                       | 14.9                                                                                                                        |
|                                                 |                   | 17060106                                          | Lower Grande Ronde          | 63.6                                                                                                                       | 100.0                                                                                                                      | 0.0                                                                                                                         |
|                                                 |                   | 17060107                                          | Lower Snake-Tucannon        | 41.6                                                                                                                       | 82.7                                                                                                                       | 23.4                                                                                                                        |
|                                                 |                   | 17060108                                          | Palouse                     | 77.5                                                                                                                       | 88.4                                                                                                                       | 37.1                                                                                                                        |
|                                                 |                   | 17060109                                          | Rock                        | 88.1                                                                                                                       | 92.8                                                                                                                       | 22.2                                                                                                                        |
|                                                 |                   | 17060110                                          | Lower Snake                 | 0.0                                                                                                                        | 11.2                                                                                                                       | 14.1                                                                                                                        |



Table S5. Estimation of Nutrient Enrichment and Summary of State 303(d) Listings Because of Impairment Related to Nutrient Enrichment within the Puget Sound Basin, the Coast Ranges of Washington and Oregon Draining Directly to the Pacific Ocean, and the Closed Basins of Oregon.

| Six-Digit Hydrologic Unit Code (HUC6) Watershed |                                | Eight-Digit Hydrologic Unit Code (HUC8) Watershed |          | Percentage of stream reach length where the probability of exceeding the suggested USEPA TN criterion was greater than 90% | Percentage of stream reach length where the probability of exceeding the suggested USEPA TP criterion was greater than 90% | Percentage of stream reach length that is placed on state 303(d) lists because of impairment related to nutrient enrichment |
|-------------------------------------------------|--------------------------------|---------------------------------------------------|----------|----------------------------------------------------------------------------------------------------------------------------|----------------------------------------------------------------------------------------------------------------------------|-----------------------------------------------------------------------------------------------------------------------------|
| 171100                                          | Puget Sound                    | Fraser                                            | 17110001 | 39.9                                                                                                                       | 38.3                                                                                                                       | 9.7                                                                                                                         |
|                                                 |                                | Strait of Georgia                                 | 17110002 | 100.0                                                                                                                      | 83.9                                                                                                                       | 37.1                                                                                                                        |
|                                                 |                                | San Juan Islands                                  | 17110003 | na                                                                                                                         | na                                                                                                                         | na                                                                                                                          |
|                                                 |                                | Nooksack                                          | 17110004 | 28.2                                                                                                                       | 40.2                                                                                                                       | 34.1                                                                                                                        |
|                                                 |                                | Upper Skagit                                      | 17110005 | 4.8                                                                                                                        | 14.0                                                                                                                       | 0.0                                                                                                                         |
|                                                 |                                | Sauk                                              | 17110006 | 1.3                                                                                                                        | 33.9                                                                                                                       | 0.0                                                                                                                         |
|                                                 |                                | Lower Skagit                                      | 17110007 | 49.5                                                                                                                       | 43.7                                                                                                                       | 34.6                                                                                                                        |
|                                                 |                                | Stillaquamish                                     | 17110008 | 22.6                                                                                                                       | 31.5                                                                                                                       | 2.6                                                                                                                         |
|                                                 |                                | Skykomish                                         | 17110009 | 15.8                                                                                                                       | 14.9                                                                                                                       | 8.0                                                                                                                         |
|                                                 |                                | Snoqualmie                                        | 17110010 | 17.9                                                                                                                       | 5.0                                                                                                                        | 11.4                                                                                                                        |
|                                                 |                                | Snohomish                                         | 17110011 | 89.5                                                                                                                       | 67.3                                                                                                                       | 54.1                                                                                                                        |
|                                                 |                                | Lake Washington                                   | 17110012 | 73.8                                                                                                                       | 66.8                                                                                                                       | 46.3                                                                                                                        |
|                                                 |                                | Duwamish                                          | 17110013 | 57.9                                                                                                                       | 87.5                                                                                                                       | 54.1                                                                                                                        |
|                                                 |                                | Puyallup                                          | 17110014 | 32.1                                                                                                                       | 73.5                                                                                                                       | 9.3                                                                                                                         |
|                                                 |                                | Nisqually                                         | 17110015 | 62.7                                                                                                                       | 74.8                                                                                                                       | 11.1                                                                                                                        |
|                                                 |                                | Deschutes                                         | 17110016 | 100.0                                                                                                                      | 100.0                                                                                                                      | 79.3                                                                                                                        |
|                                                 |                                | Skokomish                                         | 17110017 | 17.7                                                                                                                       | 62.4                                                                                                                       | 0.0                                                                                                                         |
|                                                 |                                | Hood Canal                                        | 17110018 | 8.1                                                                                                                        | 13.2                                                                                                                       | 10.9                                                                                                                        |
|                                                 |                                | Puget Sound                                       | 17110019 | 95.8                                                                                                                       | 91.5                                                                                                                       | 9.0                                                                                                                         |
|                                                 |                                | Dungeness-Elwha                                   | 17110020 | 5.1                                                                                                                        | 25.6                                                                                                                       | 0.0                                                                                                                         |
|                                                 |                                | Crescent-Hoko                                     | 17110021 | 83.0                                                                                                                       | 63.7                                                                                                                       | 0.0                                                                                                                         |
| 171001                                          | Washington Coastal Rivers      | Hoh-Quillayute                                    | 17100102 | 4.4                                                                                                                        | 66.1                                                                                                                       | 0.0                                                                                                                         |
|                                                 |                                | Queets-Quinault                                   | 17100103 | 95.2                                                                                                                       | 94.3                                                                                                                       | 5.1                                                                                                                         |
|                                                 |                                | Upper Chehalis                                    | 17100104 | 65.0                                                                                                                       | 83.8                                                                                                                       | 0.0                                                                                                                         |
|                                                 |                                | Lower Chehalis                                    | 17100105 | 0.2                                                                                                                        | 85.7                                                                                                                       | 2.2                                                                                                                         |
|                                                 |                                | Grays Harbor                                      | 17100106 | 91.0                                                                                                                       | 90.9                                                                                                                       | 3.5                                                                                                                         |
|                                                 |                                | Willapa Bay                                       | 17100101 | 21.8                                                                                                                       | 60.9                                                                                                                       | 9.3                                                                                                                         |
| 171002                                          | Northern Oregon Coastal Rivers | Necanicum                                         | 17100201 | 100.0                                                                                                                      | 100.0                                                                                                                      | 0.0                                                                                                                         |
|                                                 |                                | Nehalem                                           | 17100202 | 93.6                                                                                                                       | 96.5                                                                                                                       | 0.0                                                                                                                         |
|                                                 |                                | Wilson-Trusk-Nestucca                             | 17100203 | 100.0                                                                                                                      | 94.2                                                                                                                       | 33.3                                                                                                                        |
|                                                 |                                | Siletz-Yaquina                                    | 17100204 | 97.2                                                                                                                       | 70.1                                                                                                                       | 8.0                                                                                                                         |
|                                                 |                                | Alea                                              | 17100205 | 95.7                                                                                                                       | 81.6                                                                                                                       | 8.3                                                                                                                         |
|                                                 |                                | Siuslaw                                           | 17100206 | 72.8                                                                                                                       | 62.6                                                                                                                       | 23.6                                                                                                                        |
|                                                 |                                | Siltcoos                                          | 17100207 | 94.8                                                                                                                       | 83.3                                                                                                                       | 0.0                                                                                                                         |
| 171003                                          | Southern Oregon Coastal Rivers | North Umpqua                                      | 17100301 | 27.8                                                                                                                       | 80.1                                                                                                                       | 7.7                                                                                                                         |
|                                                 |                                | South Umpqua                                      | 17100302 | 34.3                                                                                                                       | 59.3                                                                                                                       | 22.0                                                                                                                        |
|                                                 |                                | Umpqua                                            | 17100303 | 63.1                                                                                                                       | 73.8                                                                                                                       | 5.3                                                                                                                         |
|                                                 |                                | Coos                                              | 17100304 | 88.2                                                                                                                       | 77.2                                                                                                                       | 10.5                                                                                                                        |
|                                                 |                                | Coquille                                          | 17100305 | 71.4                                                                                                                       | 46.9                                                                                                                       | 20.3                                                                                                                        |
|                                                 |                                | Sixes                                             | 17100306 | 98.7                                                                                                                       | 100.0                                                                                                                      | 8.1                                                                                                                         |
|                                                 |                                | Upper Rogue                                       | 17100307 | 23.1                                                                                                                       | 98.5                                                                                                                       | 10.2                                                                                                                        |
|                                                 |                                | Middle Rogue                                      | 17100308 | 47.3                                                                                                                       | 73.0                                                                                                                       | 5.0                                                                                                                         |
|                                                 |                                | Applegate                                         | 17100309 | 4.5                                                                                                                        | 38.6                                                                                                                       | 12.5                                                                                                                        |
|                                                 |                                | Lower Rogue                                       | 17100310 | 49.8                                                                                                                       | 72.7                                                                                                                       | 18.7                                                                                                                        |
|                                                 |                                | Illinois                                          | 17100311 | 18.1                                                                                                                       | 66.9                                                                                                                       | 0.0                                                                                                                         |
|                                                 |                                | Chetco                                            | 17100312 | 1.8                                                                                                                        | 50.6                                                                                                                       | 11.8                                                                                                                        |
| 171200                                          | Oregon Closed Basins           | Harney-Malheur                                    | 17120001 | 68.1                                                                                                                       | 85.0                                                                                                                       | 0.0                                                                                                                         |
|                                                 |                                | Silvies                                           | 17120002 | 84.4                                                                                                                       | 95.0                                                                                                                       | 5.6                                                                                                                         |
|                                                 |                                | Donner und Blitzen                                | 17120003 | 0.0                                                                                                                        | 48.6                                                                                                                       | 0.0                                                                                                                         |
|                                                 |                                | Silver                                            | 17120004 | 22.5                                                                                                                       | 33.0                                                                                                                       | 0.0                                                                                                                         |
|                                                 |                                | Summer Lake                                       | 17120005 | 86.5                                                                                                                       | 91.5                                                                                                                       | 0.0                                                                                                                         |
|                                                 |                                | Lake Albert                                       | 17120006 | 54.0                                                                                                                       | 73.5                                                                                                                       | 0.0                                                                                                                         |
|                                                 |                                | Warner Lakes                                      | 17120007 | 17.2                                                                                                                       | 49.5                                                                                                                       | 8.0                                                                                                                         |
|                                                 |                                | Guano                                             | 17120008 | 0.0                                                                                                                        | 11.6                                                                                                                       | 0.0                                                                                                                         |
| Alvord Lake                                     | 17120009                       | 0.0                                               | 71.9     | 0.0                                                                                                                        |                                                                                                                            |                                                                                                                             |

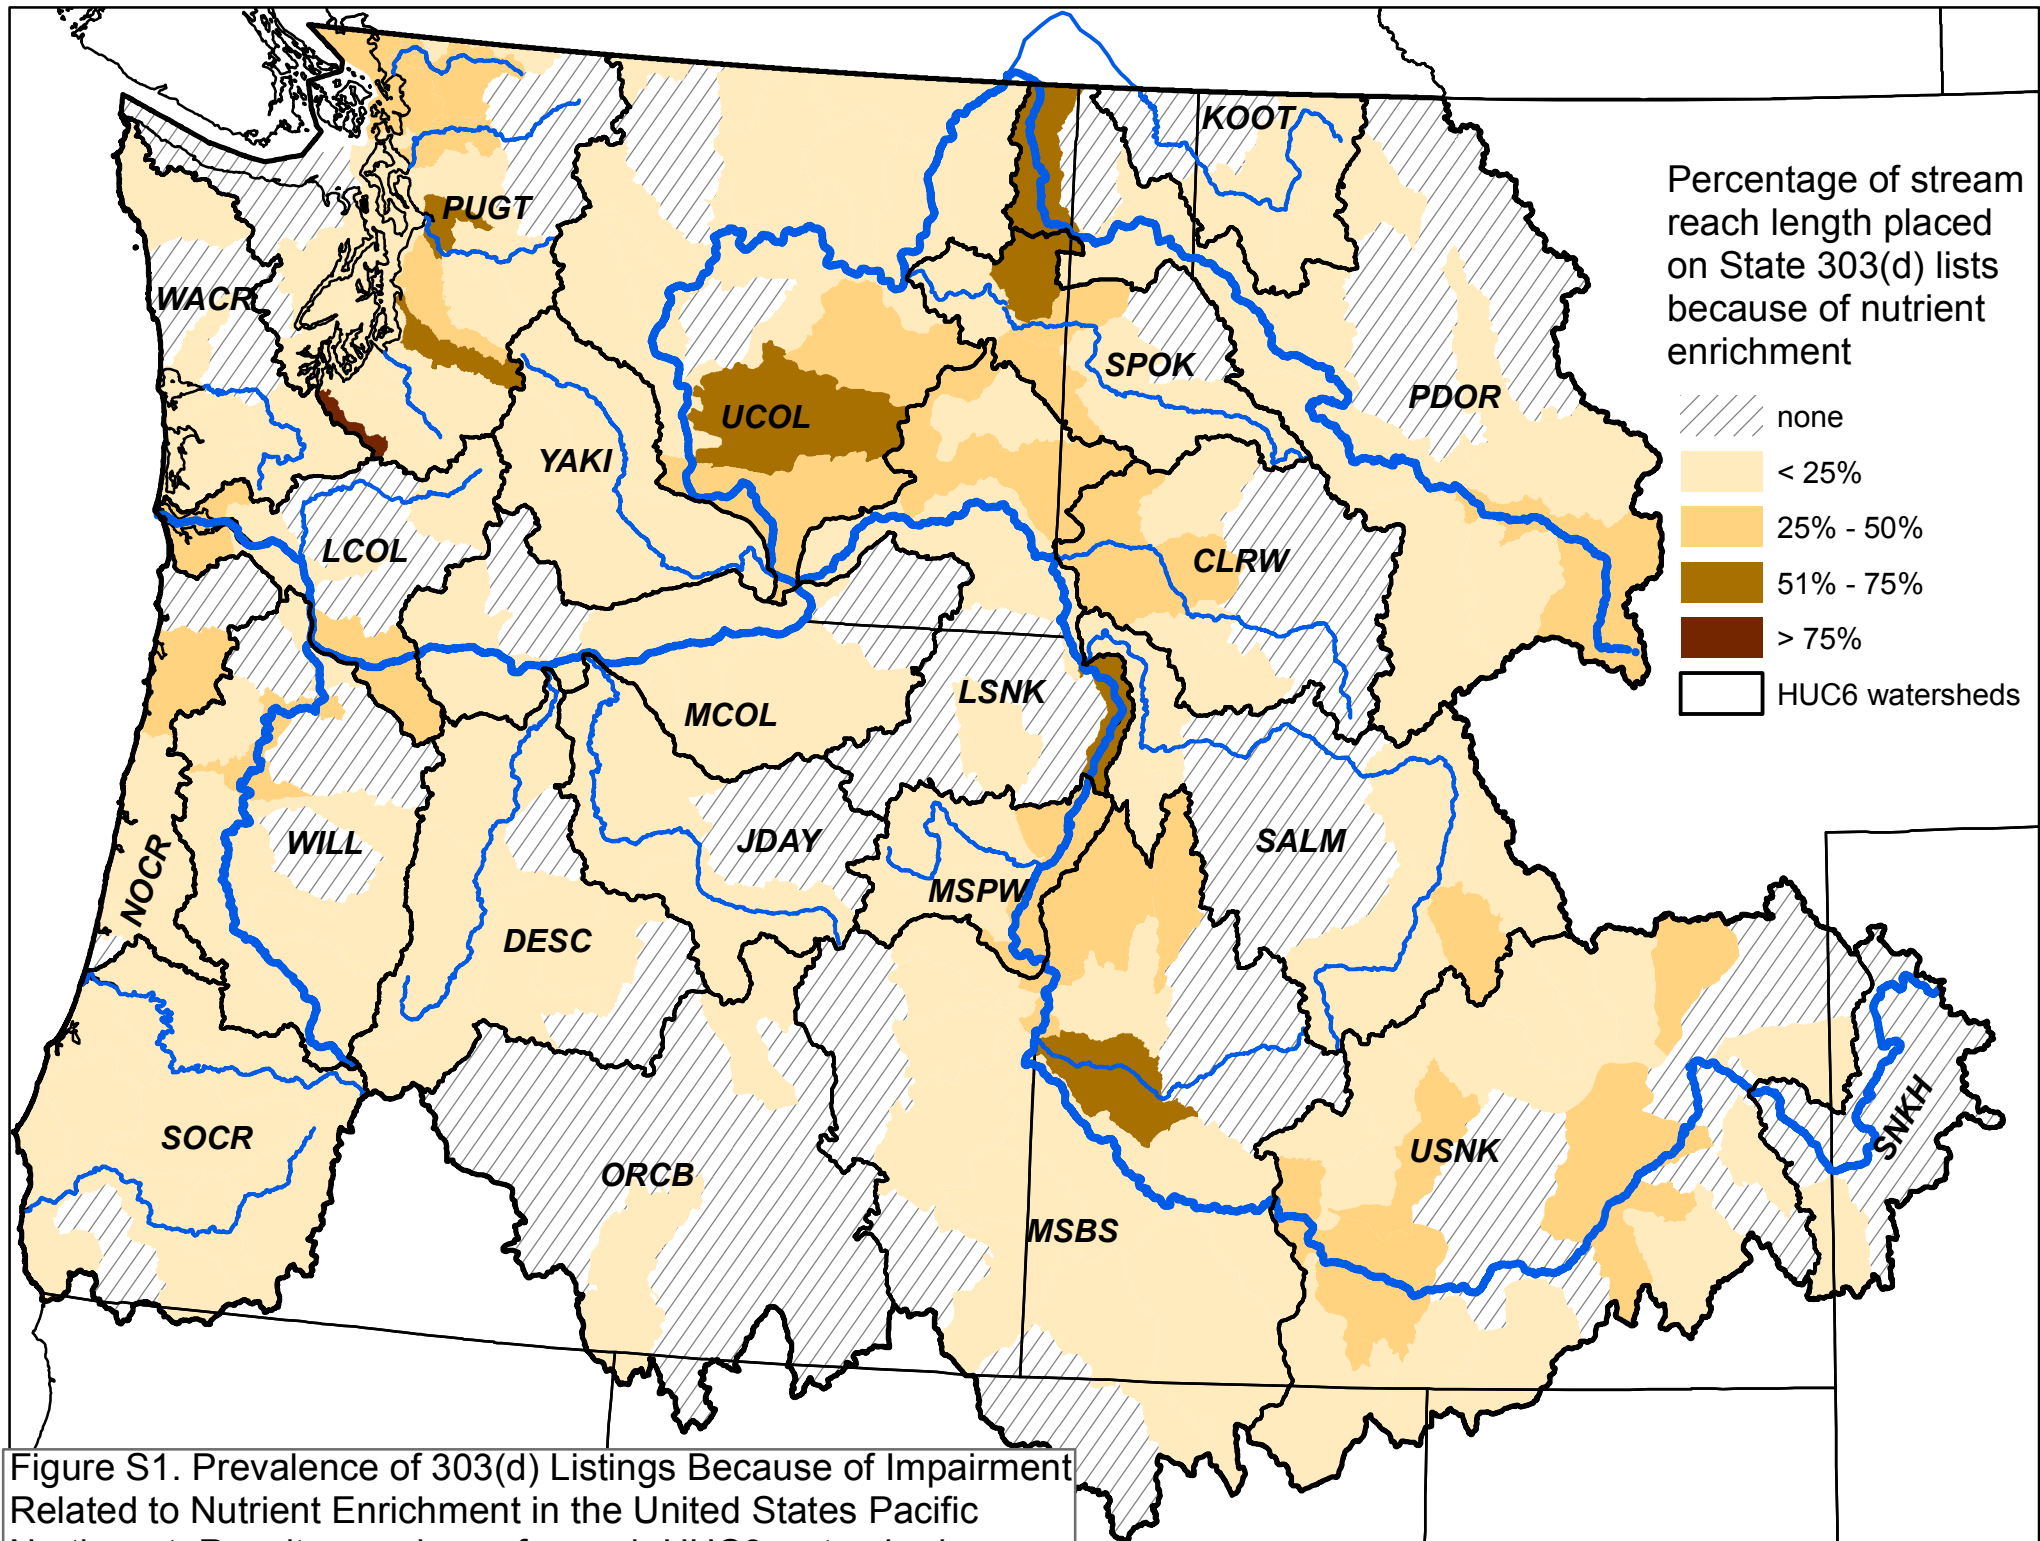

Figure S1. Prevalence of 303(d) Listings Because of Impairment Related to Nutrient Enrichment in the United States Pacific Northwest. Results are shown for each HUC8 watershed.

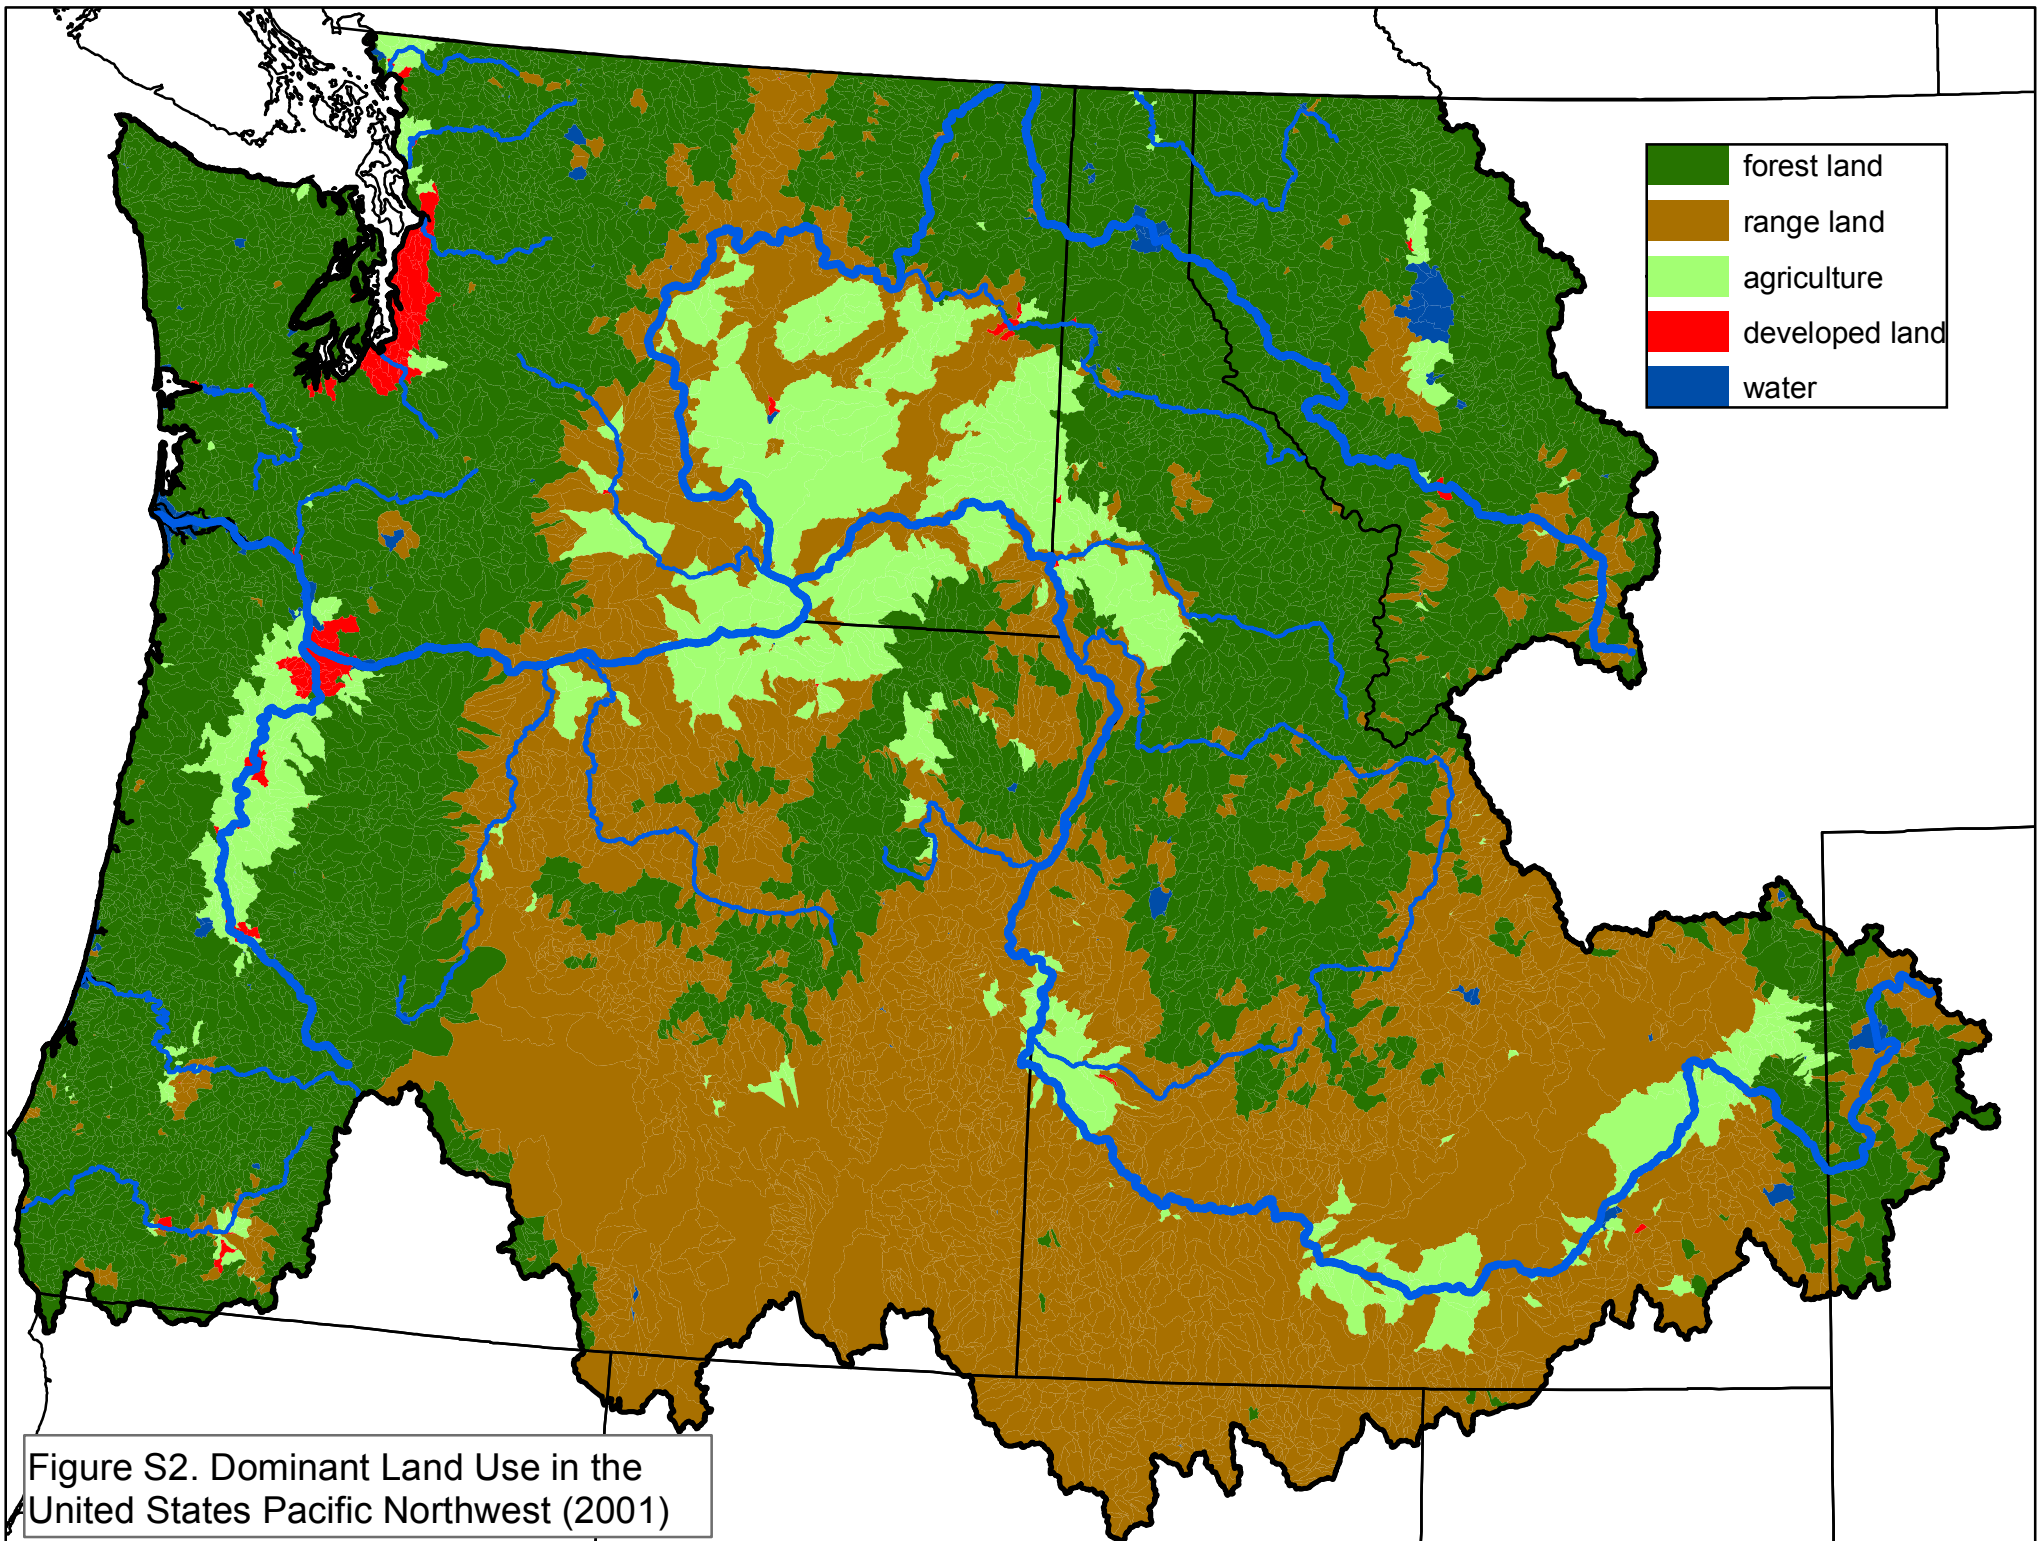

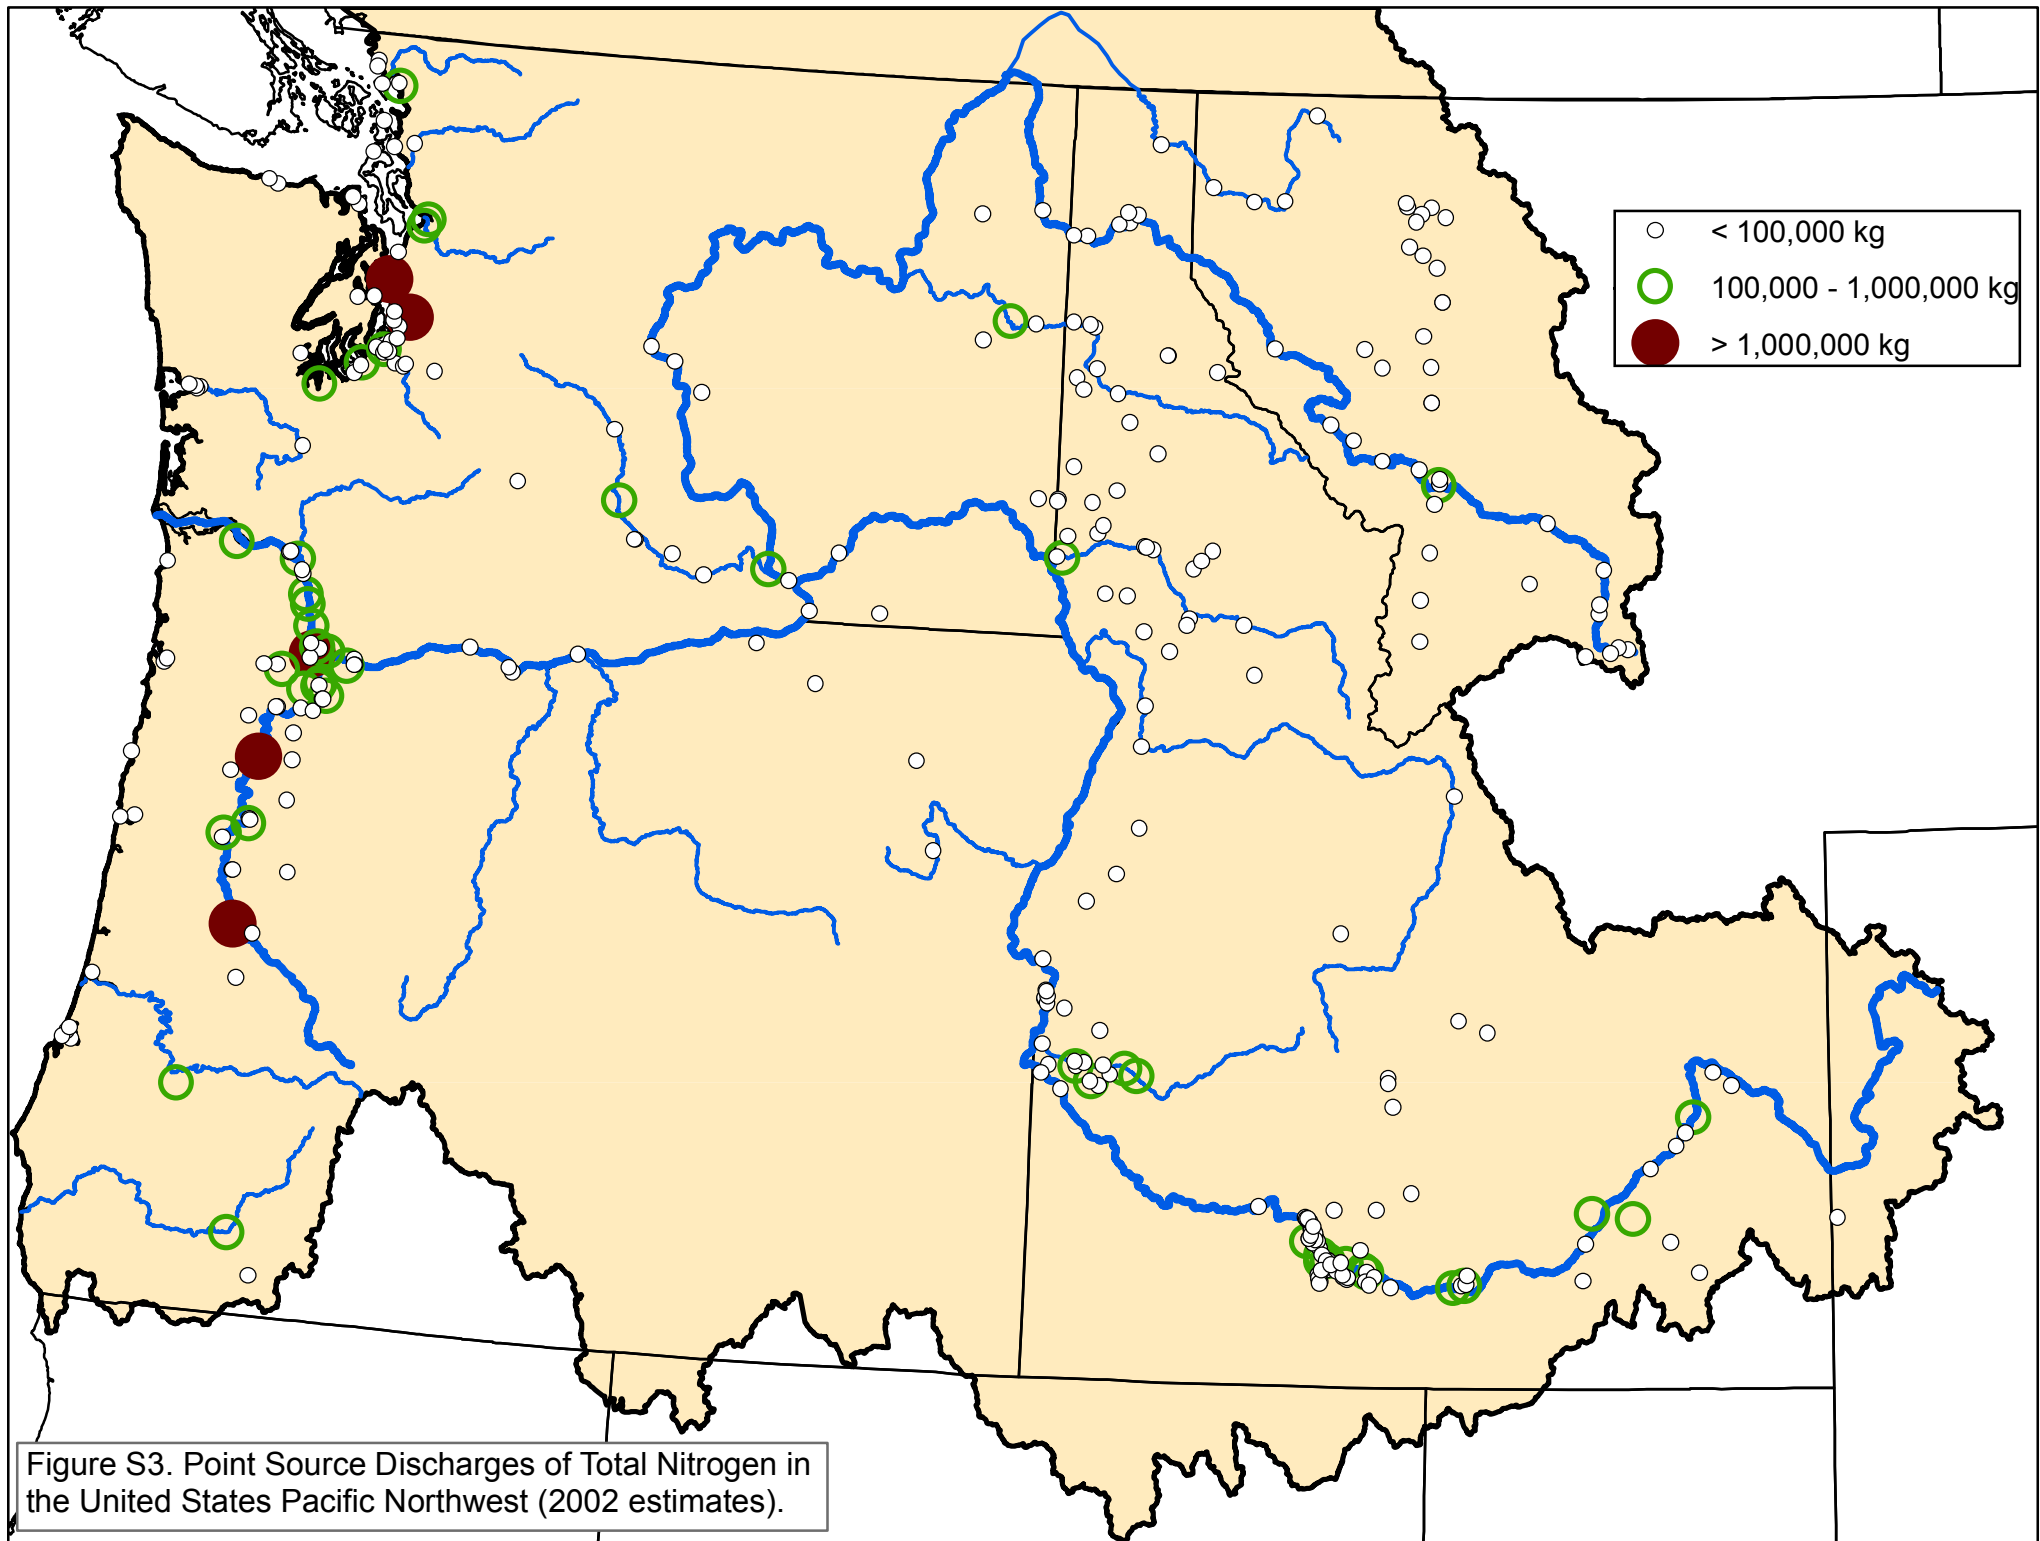

Figure S3. Point Source Discharges of Total Nitrogen in the United States Pacific Northwest (2002 estimates).

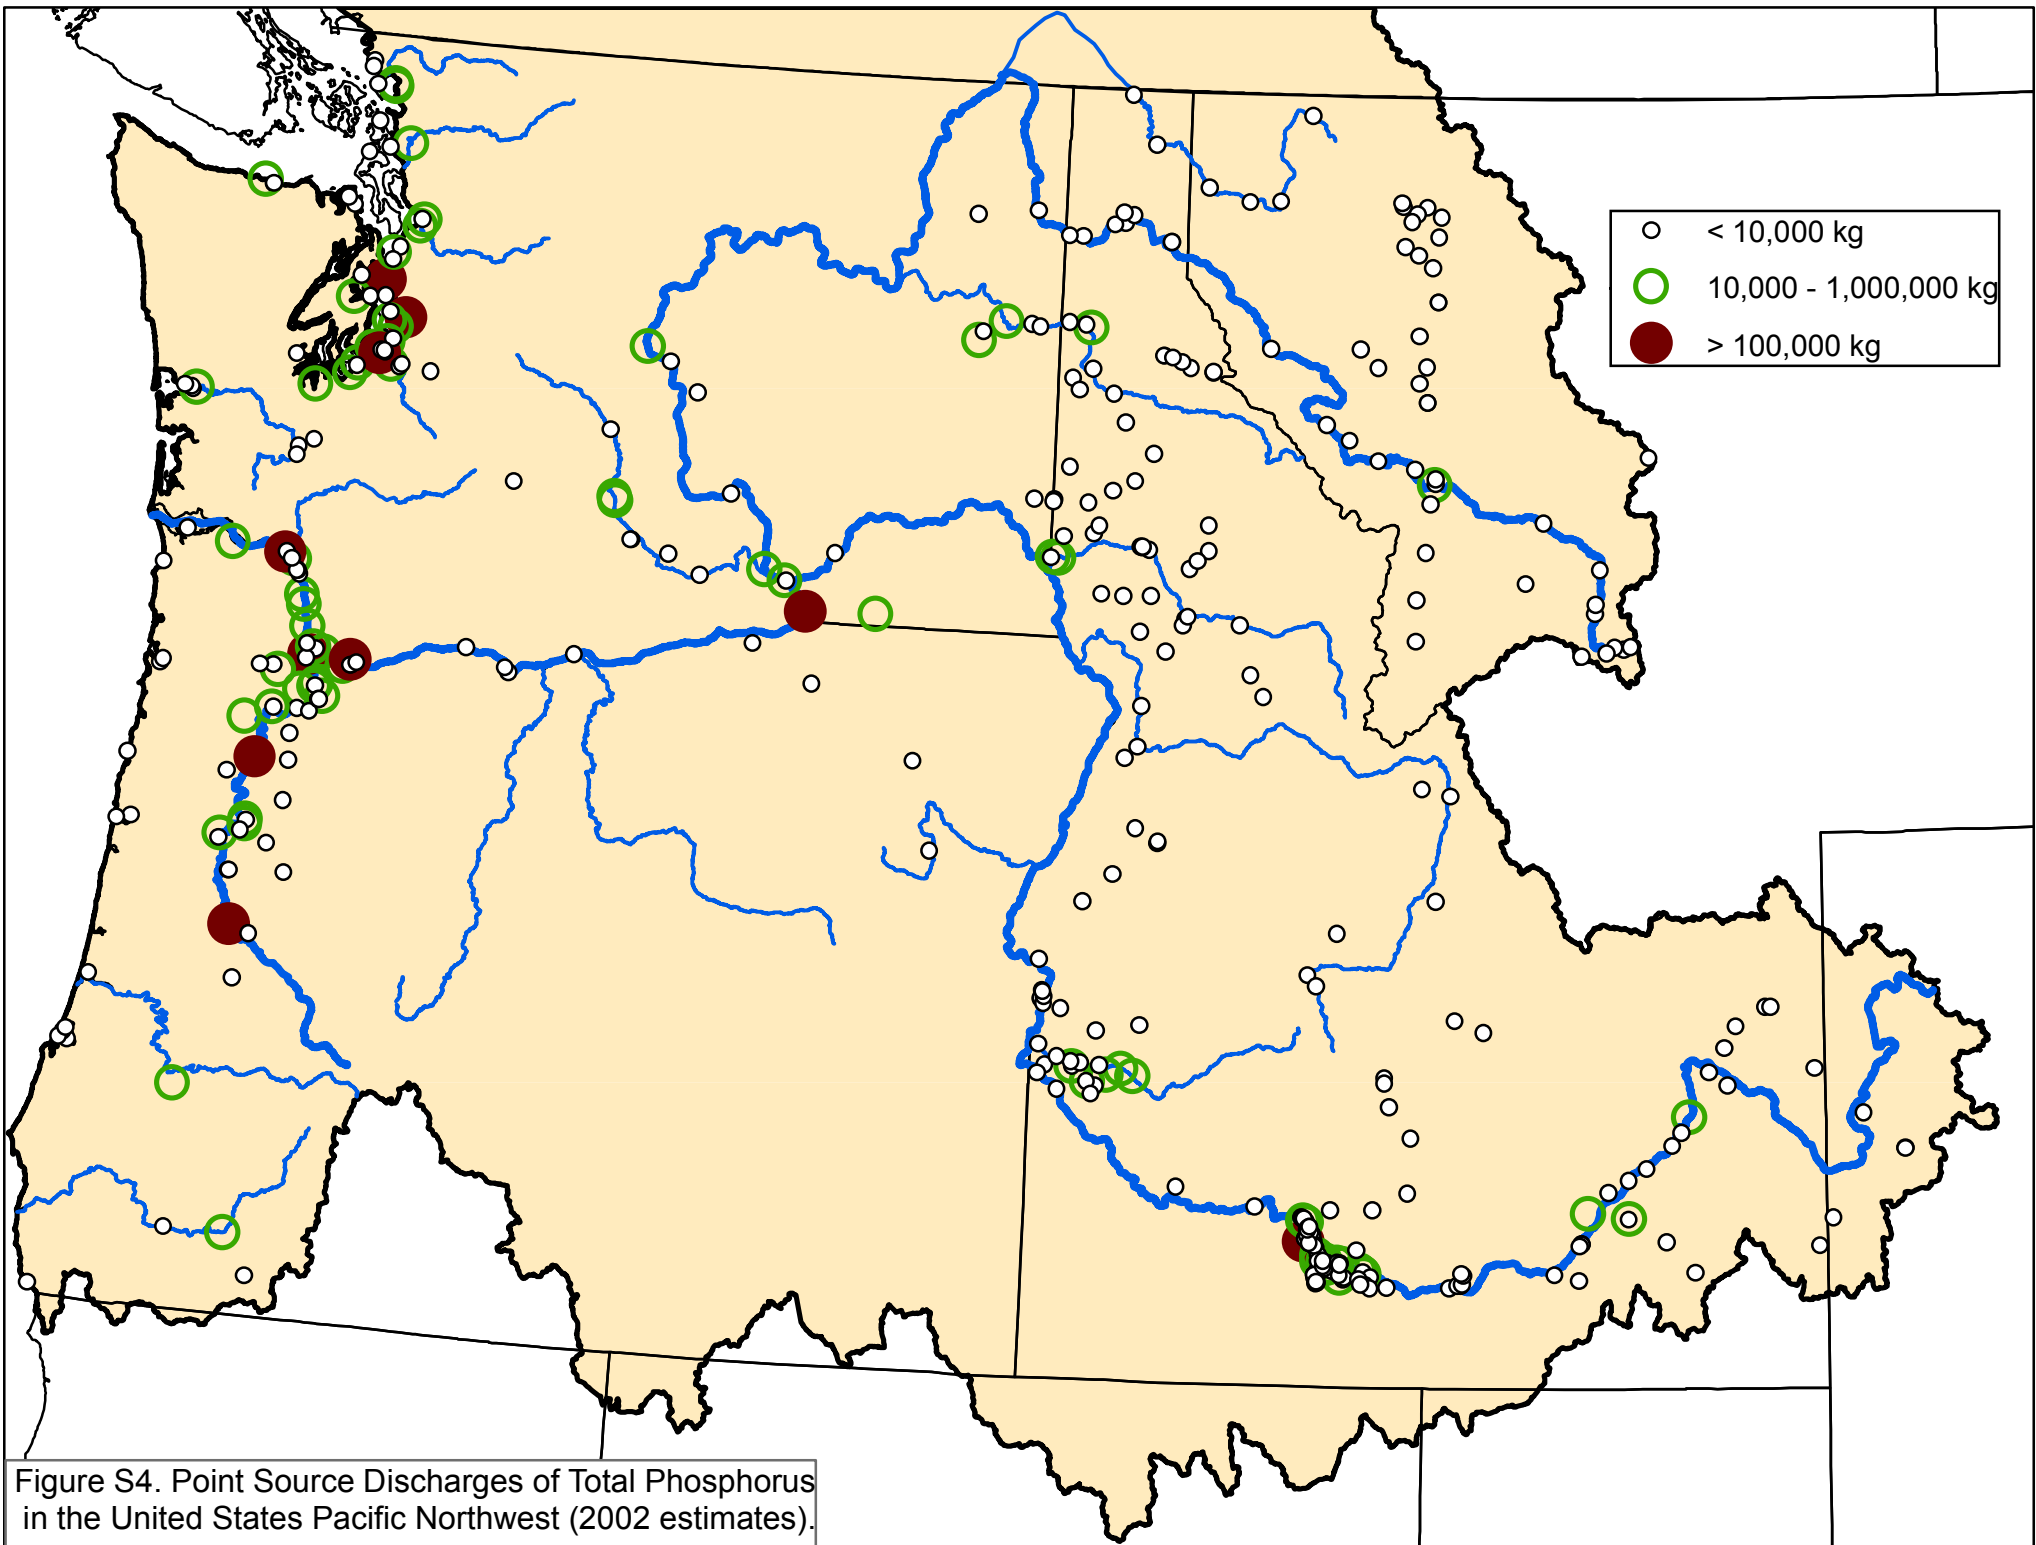

Figure S4. Point Source Discharges of Total Phosphorus in the United States Pacific Northwest (2002 estimates).

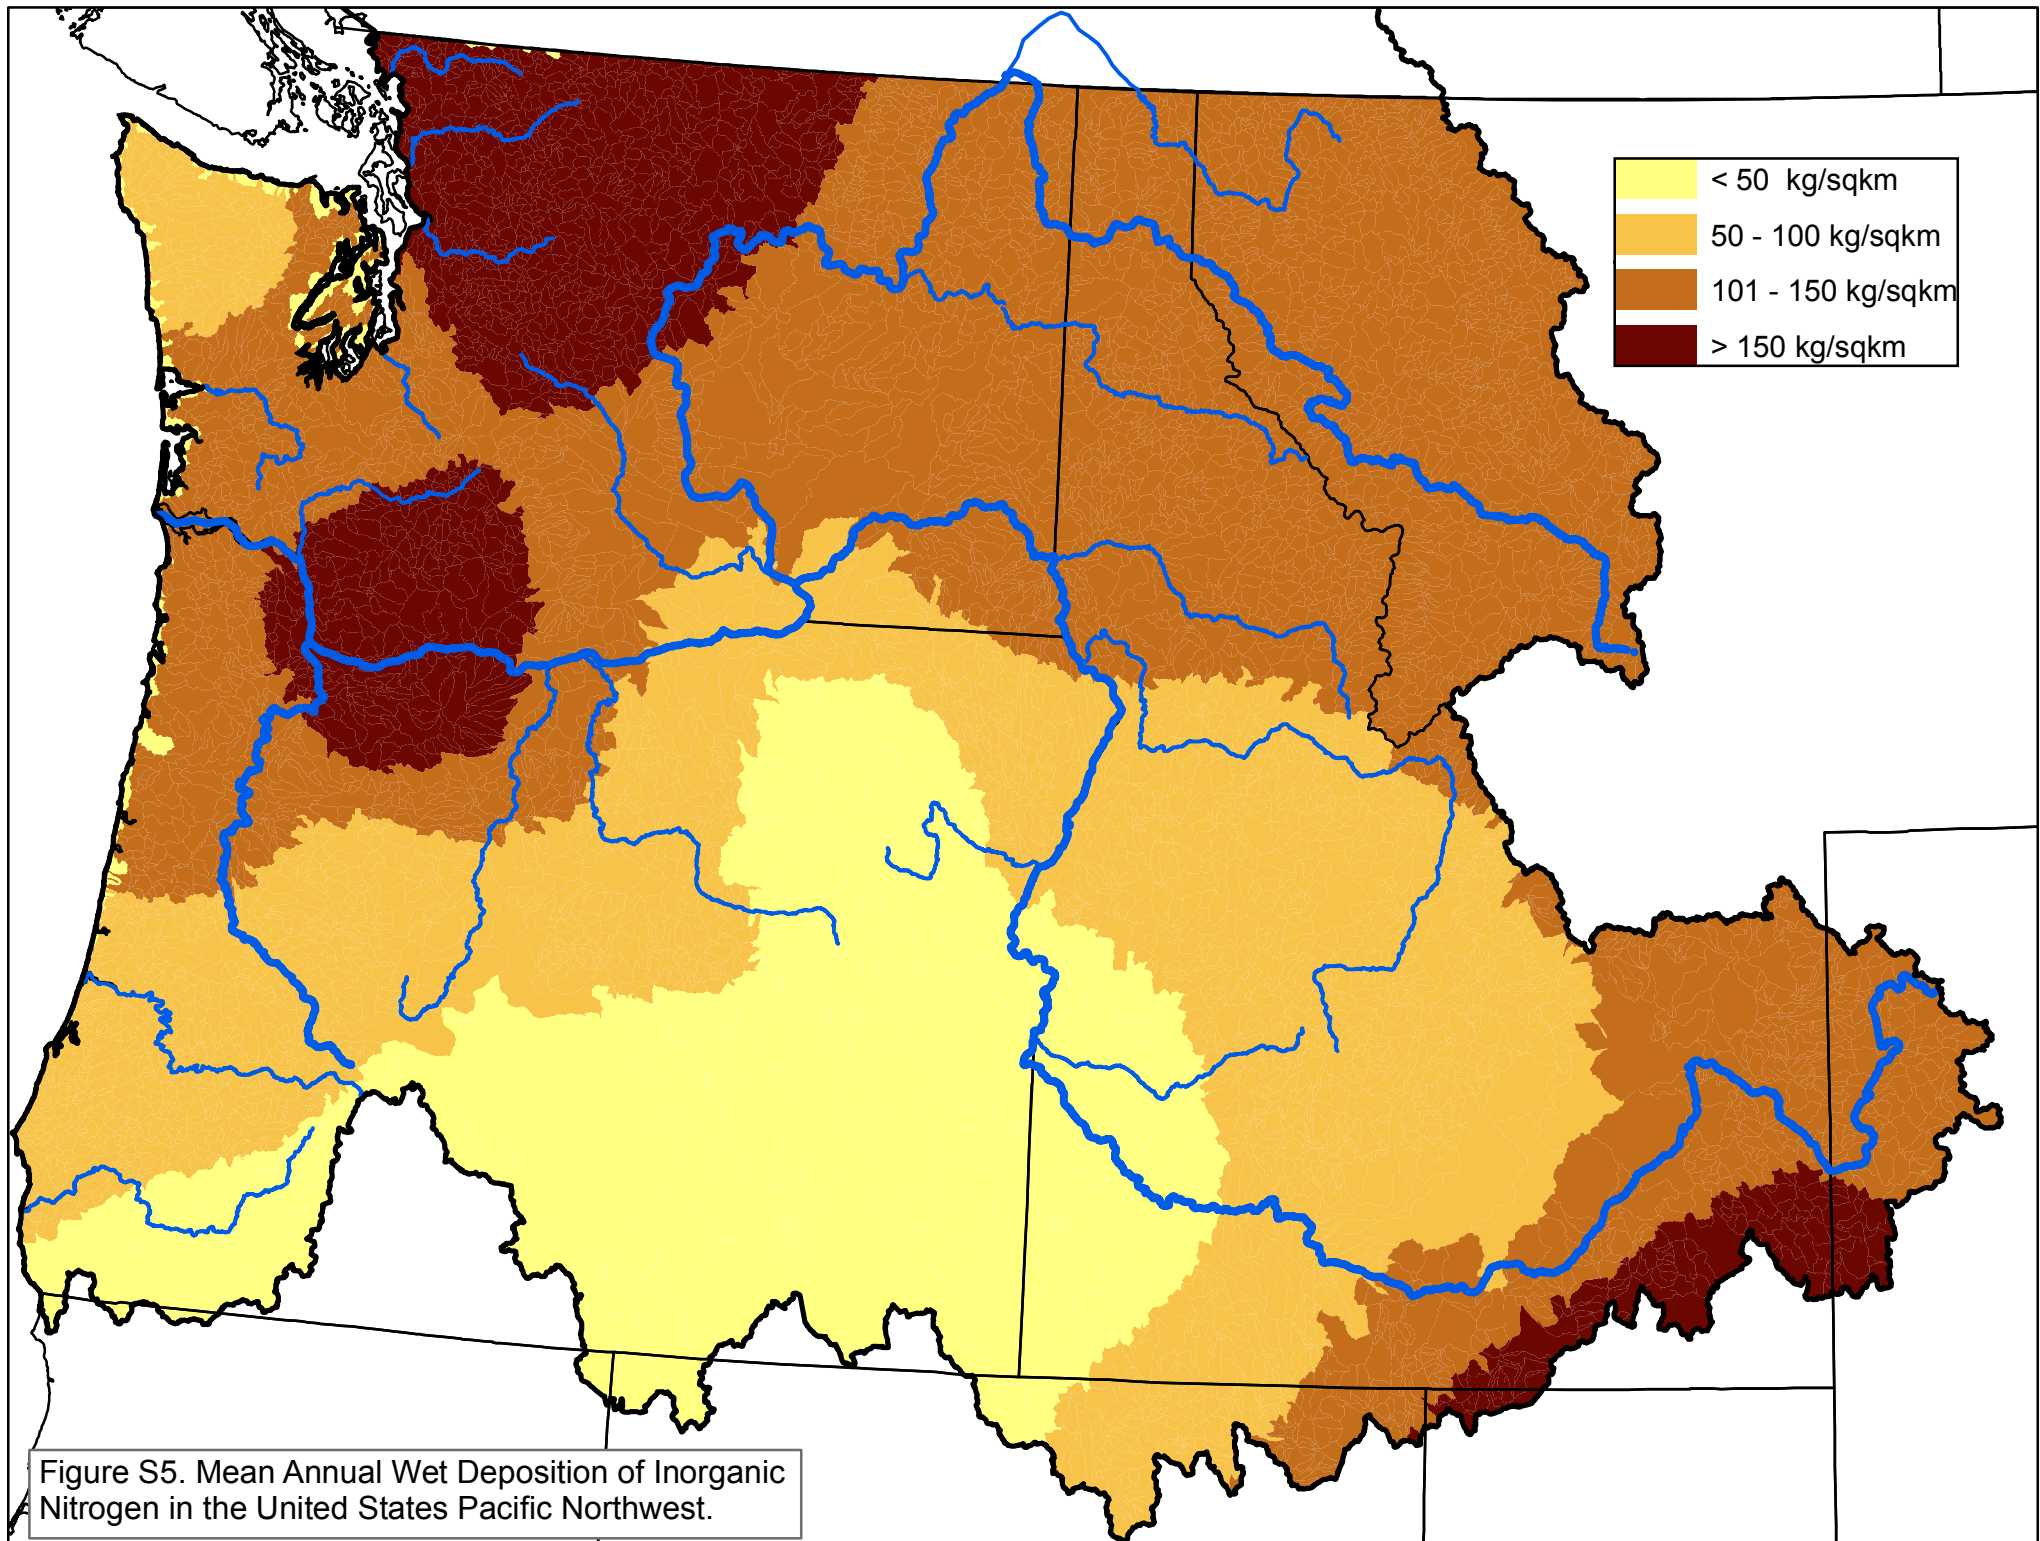

Figure S5. Mean Annual Wet Deposition of Inorganic Nitrogen in the United States Pacific Northwest.

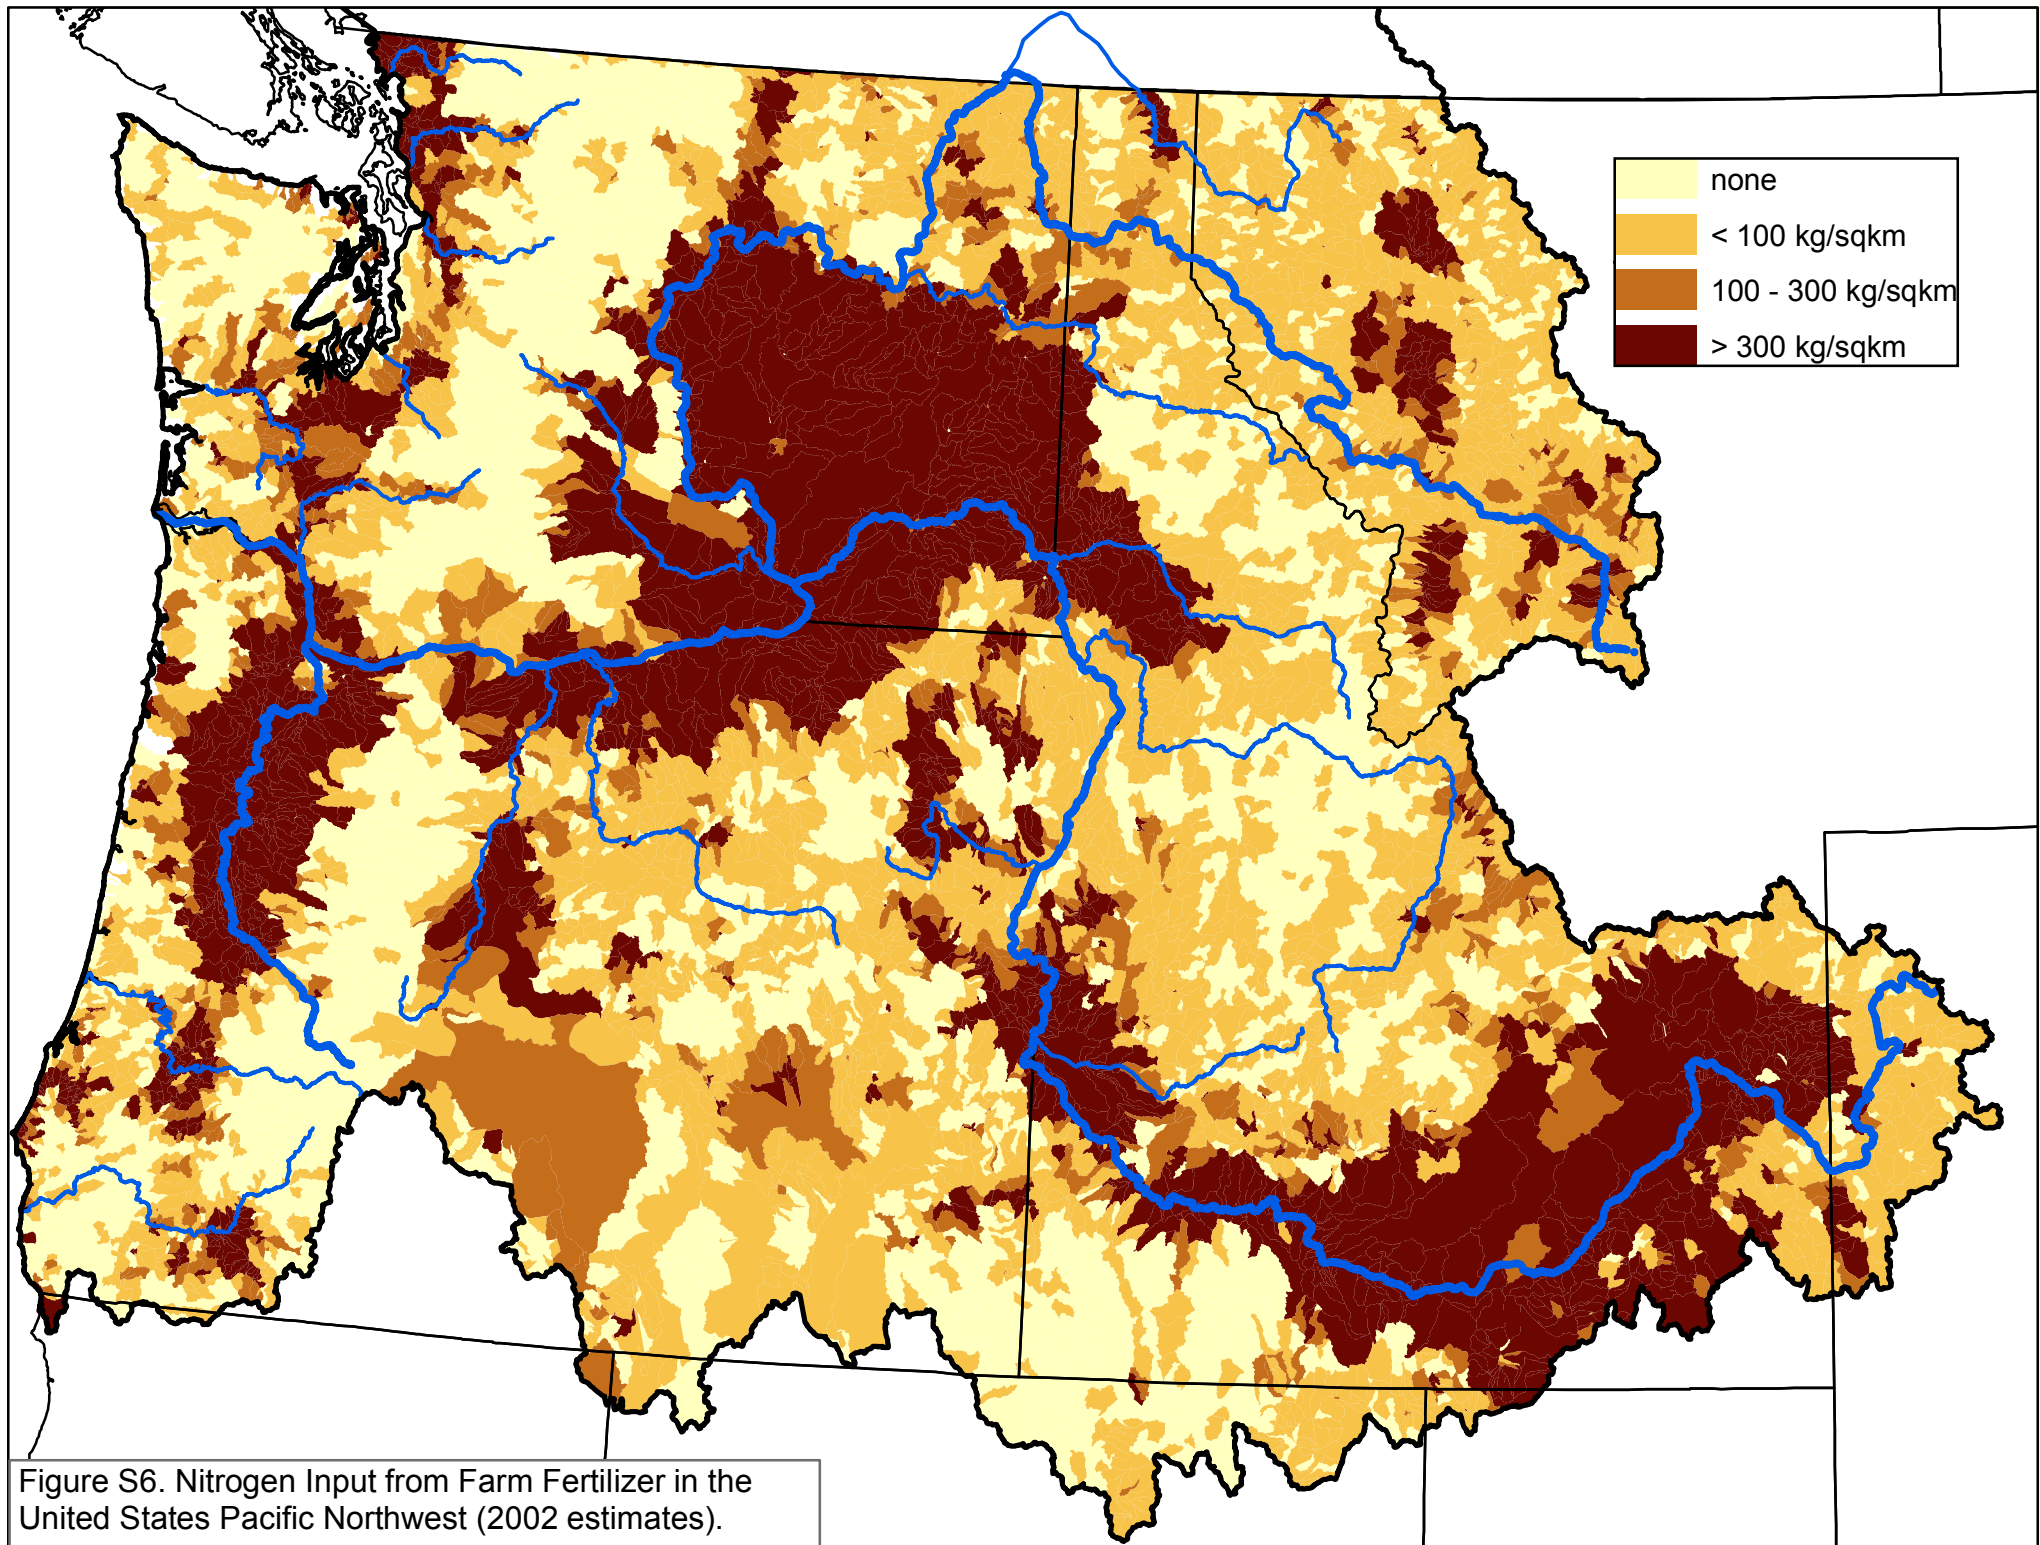

Figure S6. Nitrogen Input from Farm Fertilizer in the United States Pacific Northwest (2002 estimates).

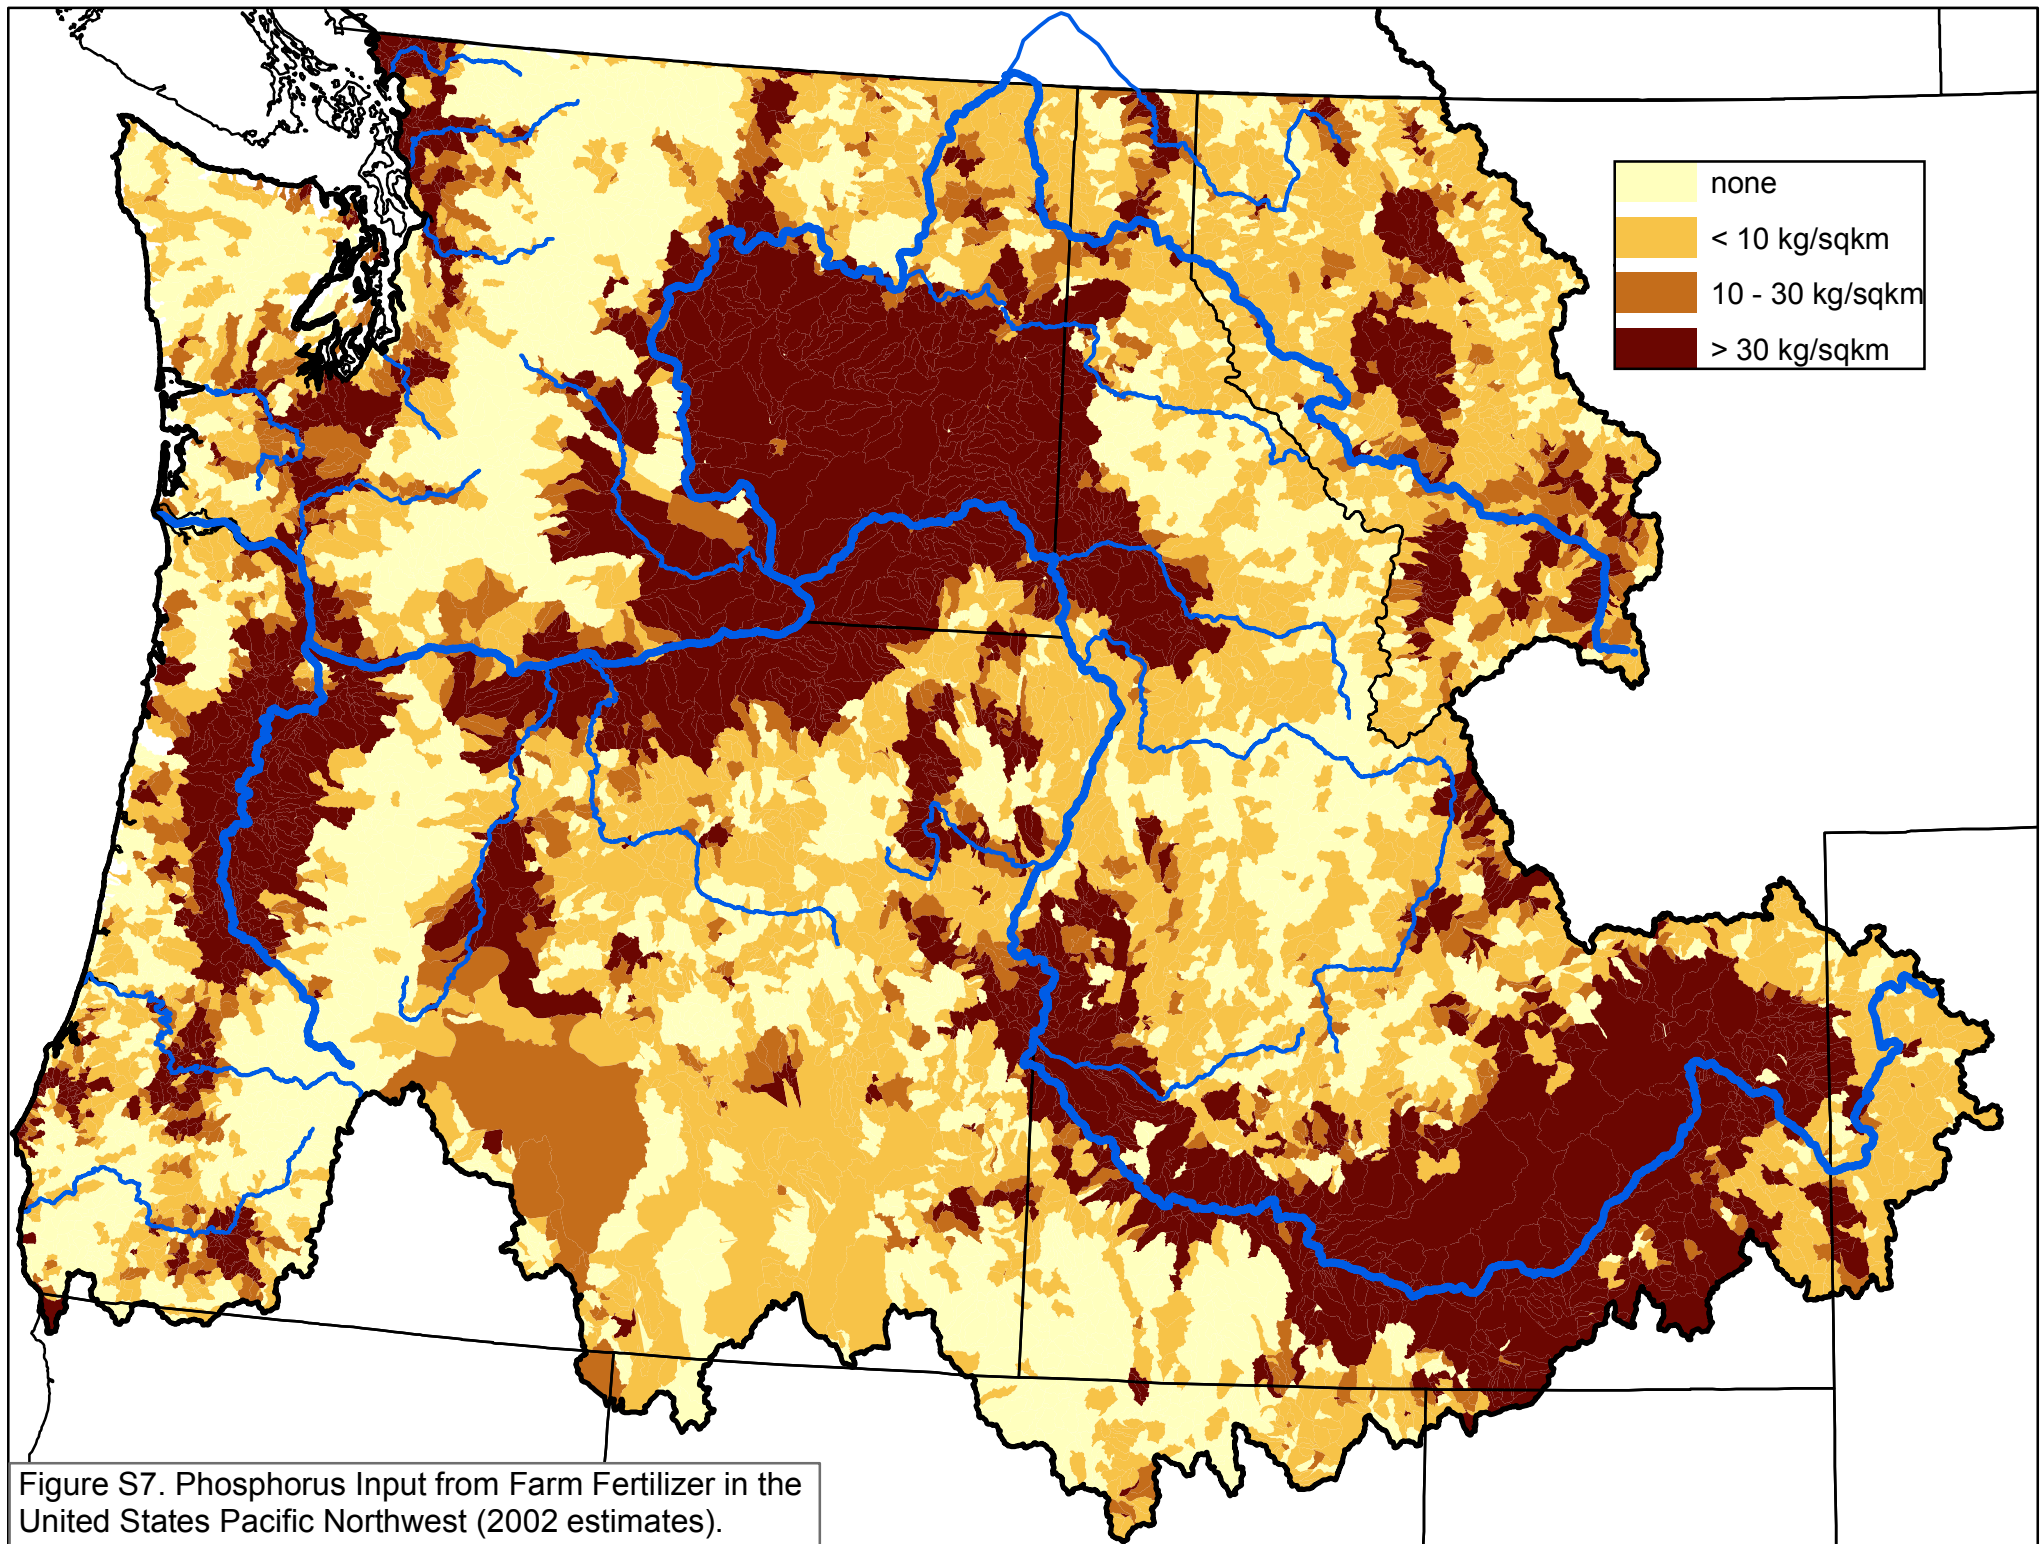

Figure S7. Phosphorus Input from Farm Fertilizer in the United States Pacific Northwest (2002 estimates).



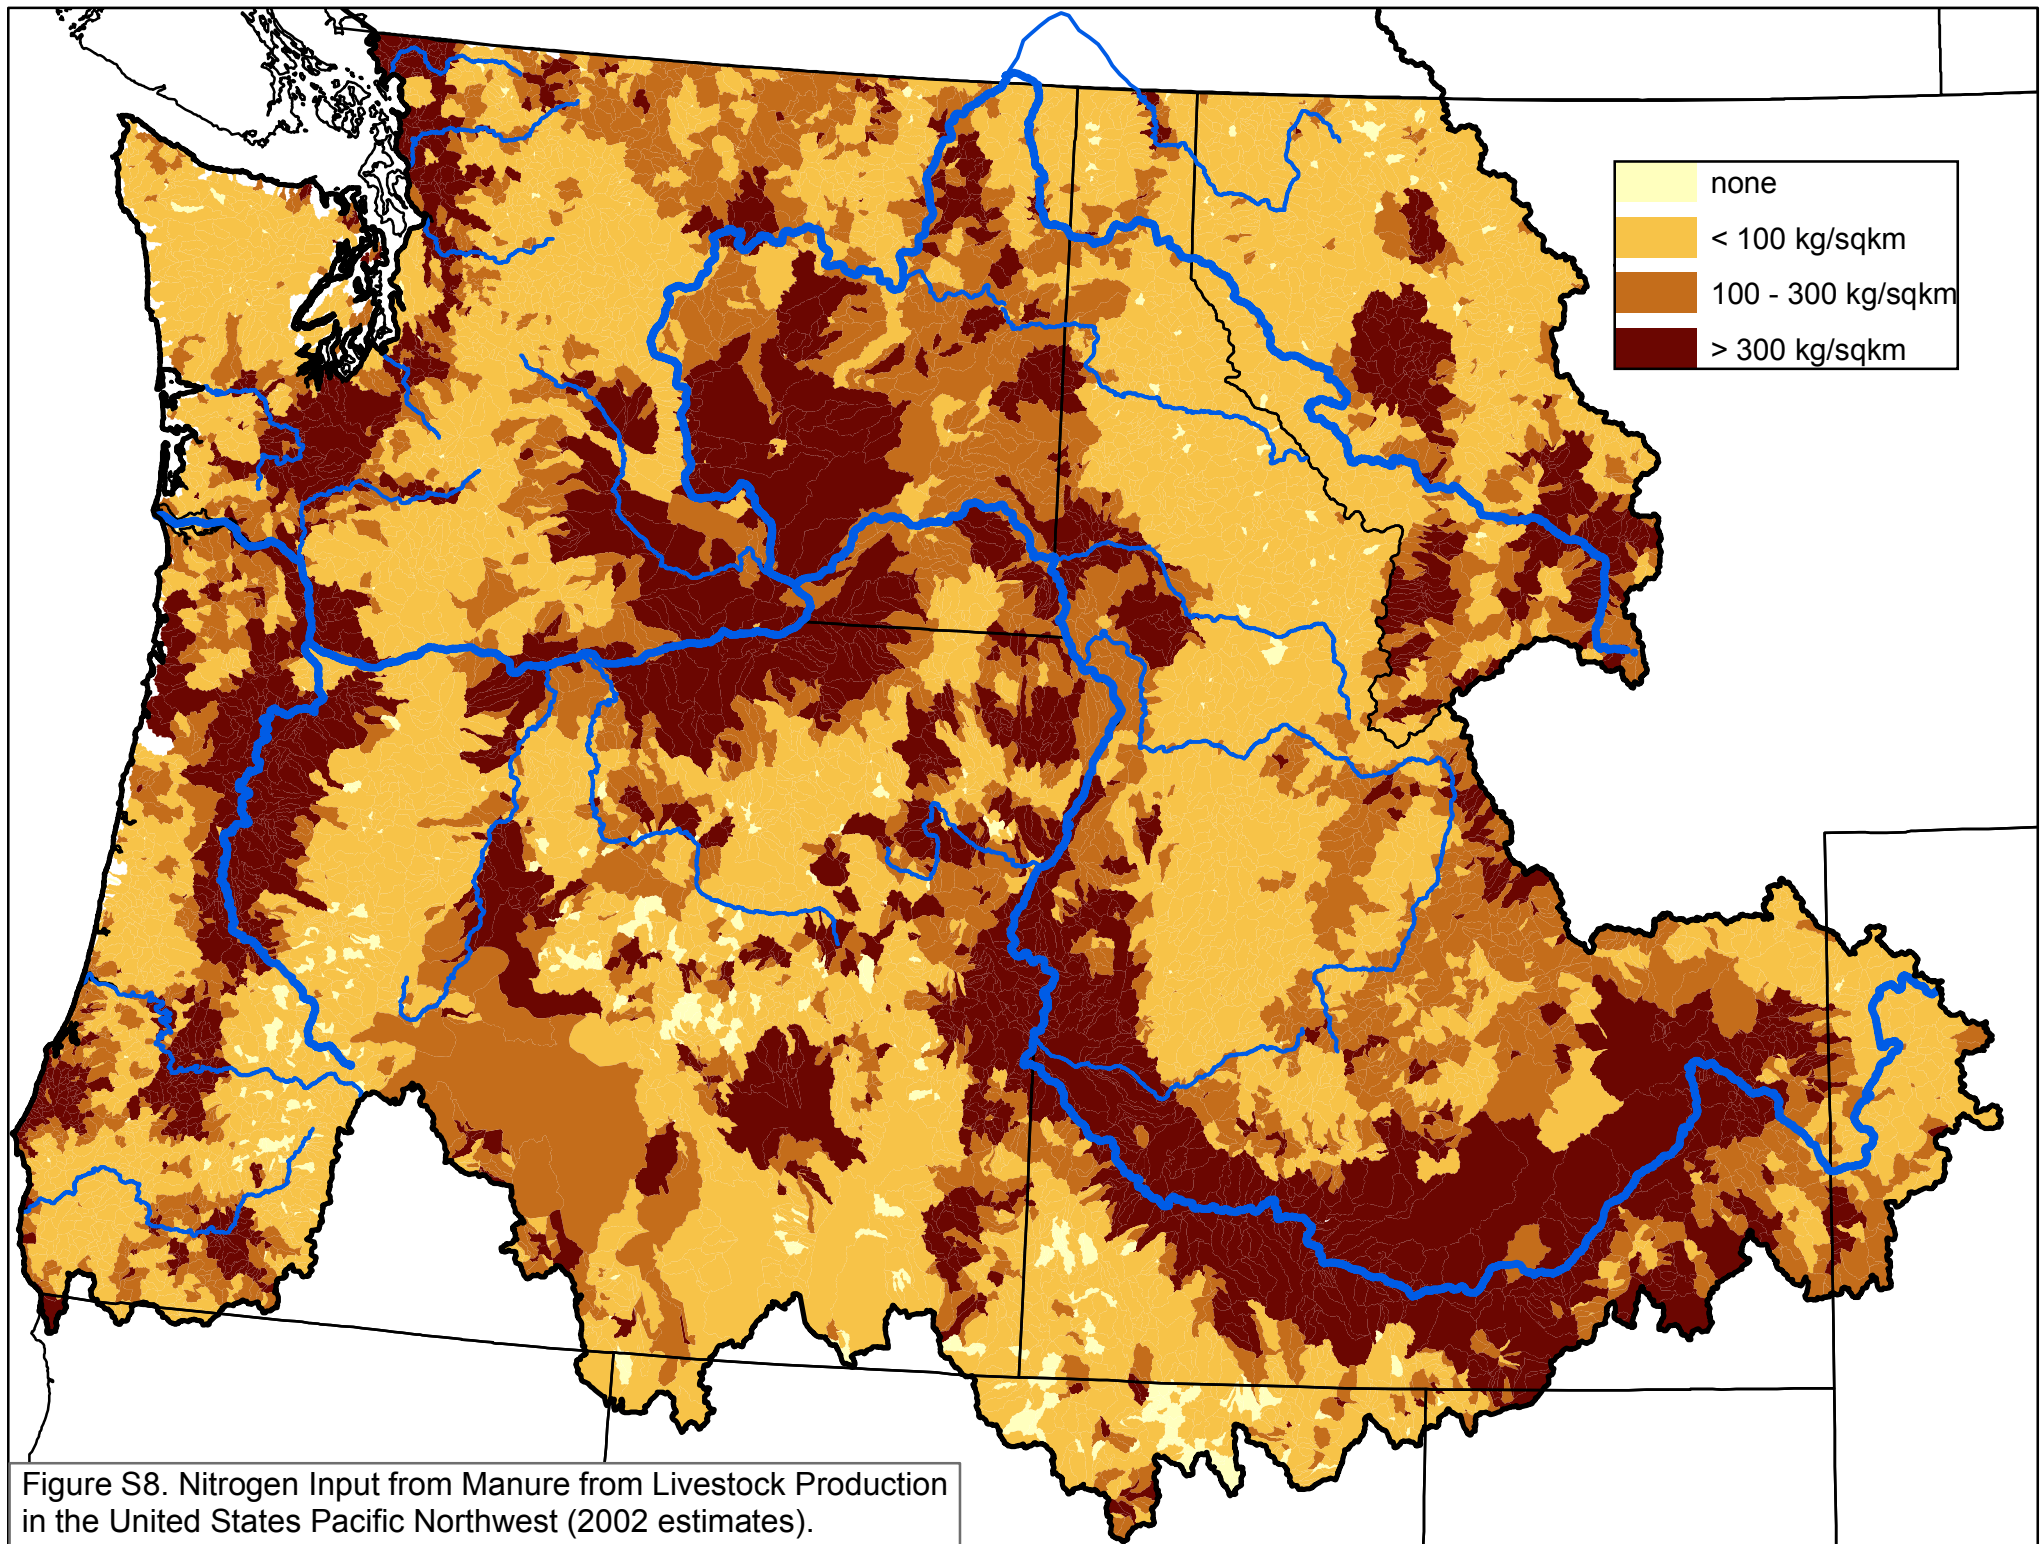

Figure S8. Nitrogen Input from Manure from Livestock Production in the United States Pacific Northwest (2002 estimates).

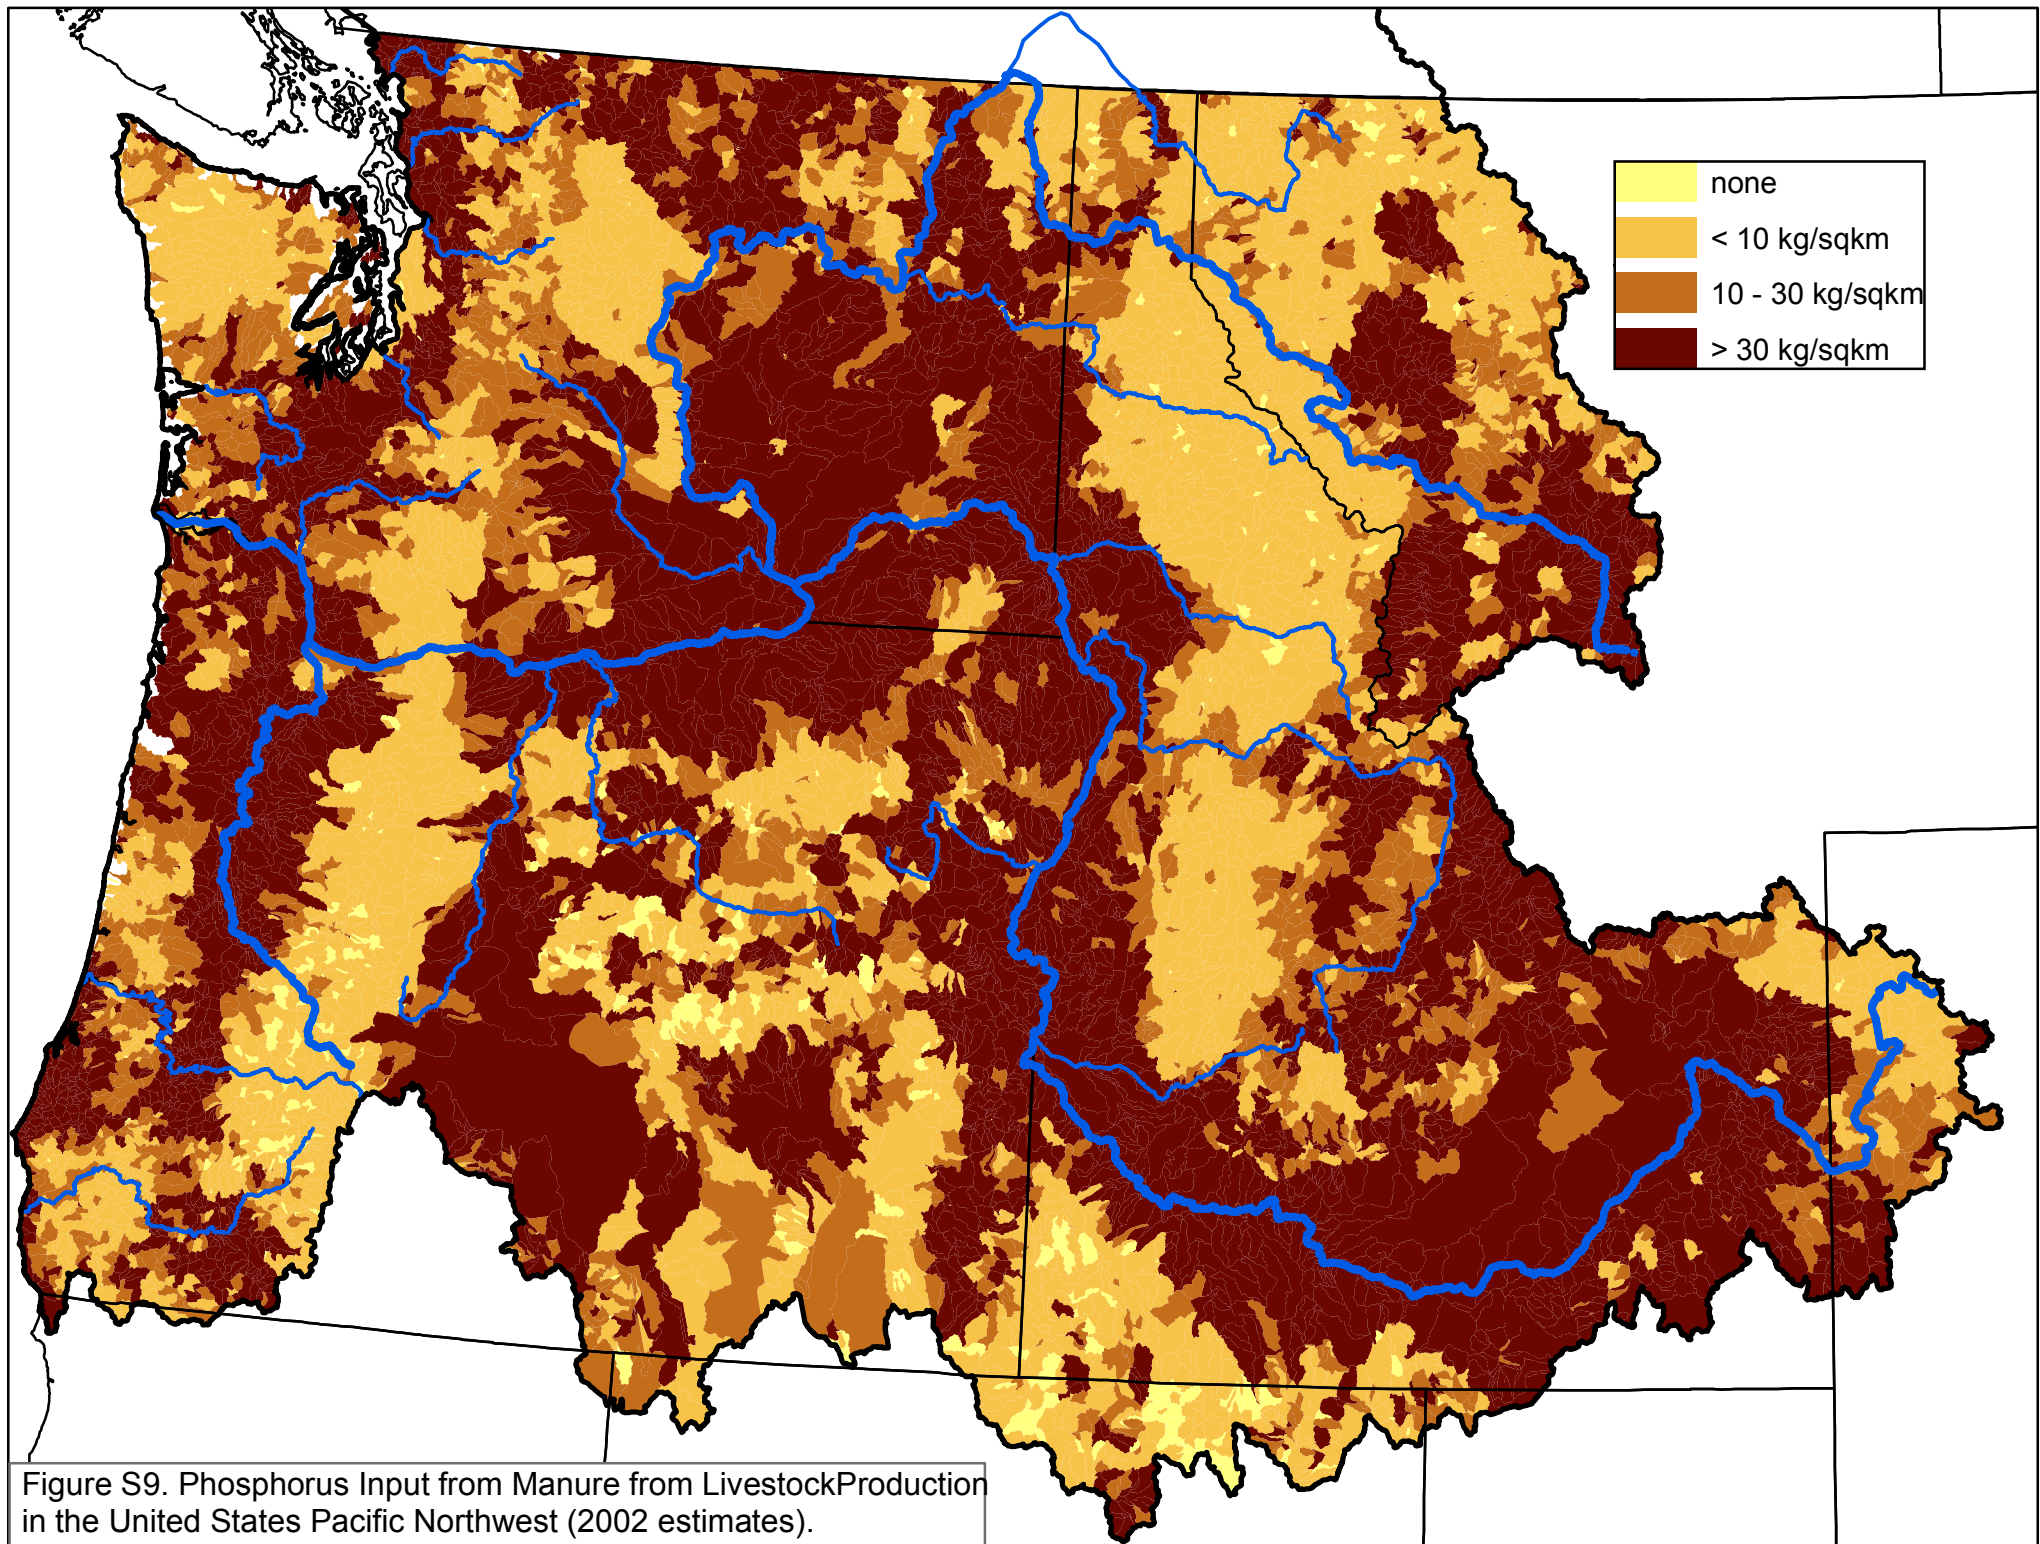

Figure S9. Phosphorus Input from Manure from Livestock Production in the United States Pacific Northwest (2002 estimates).

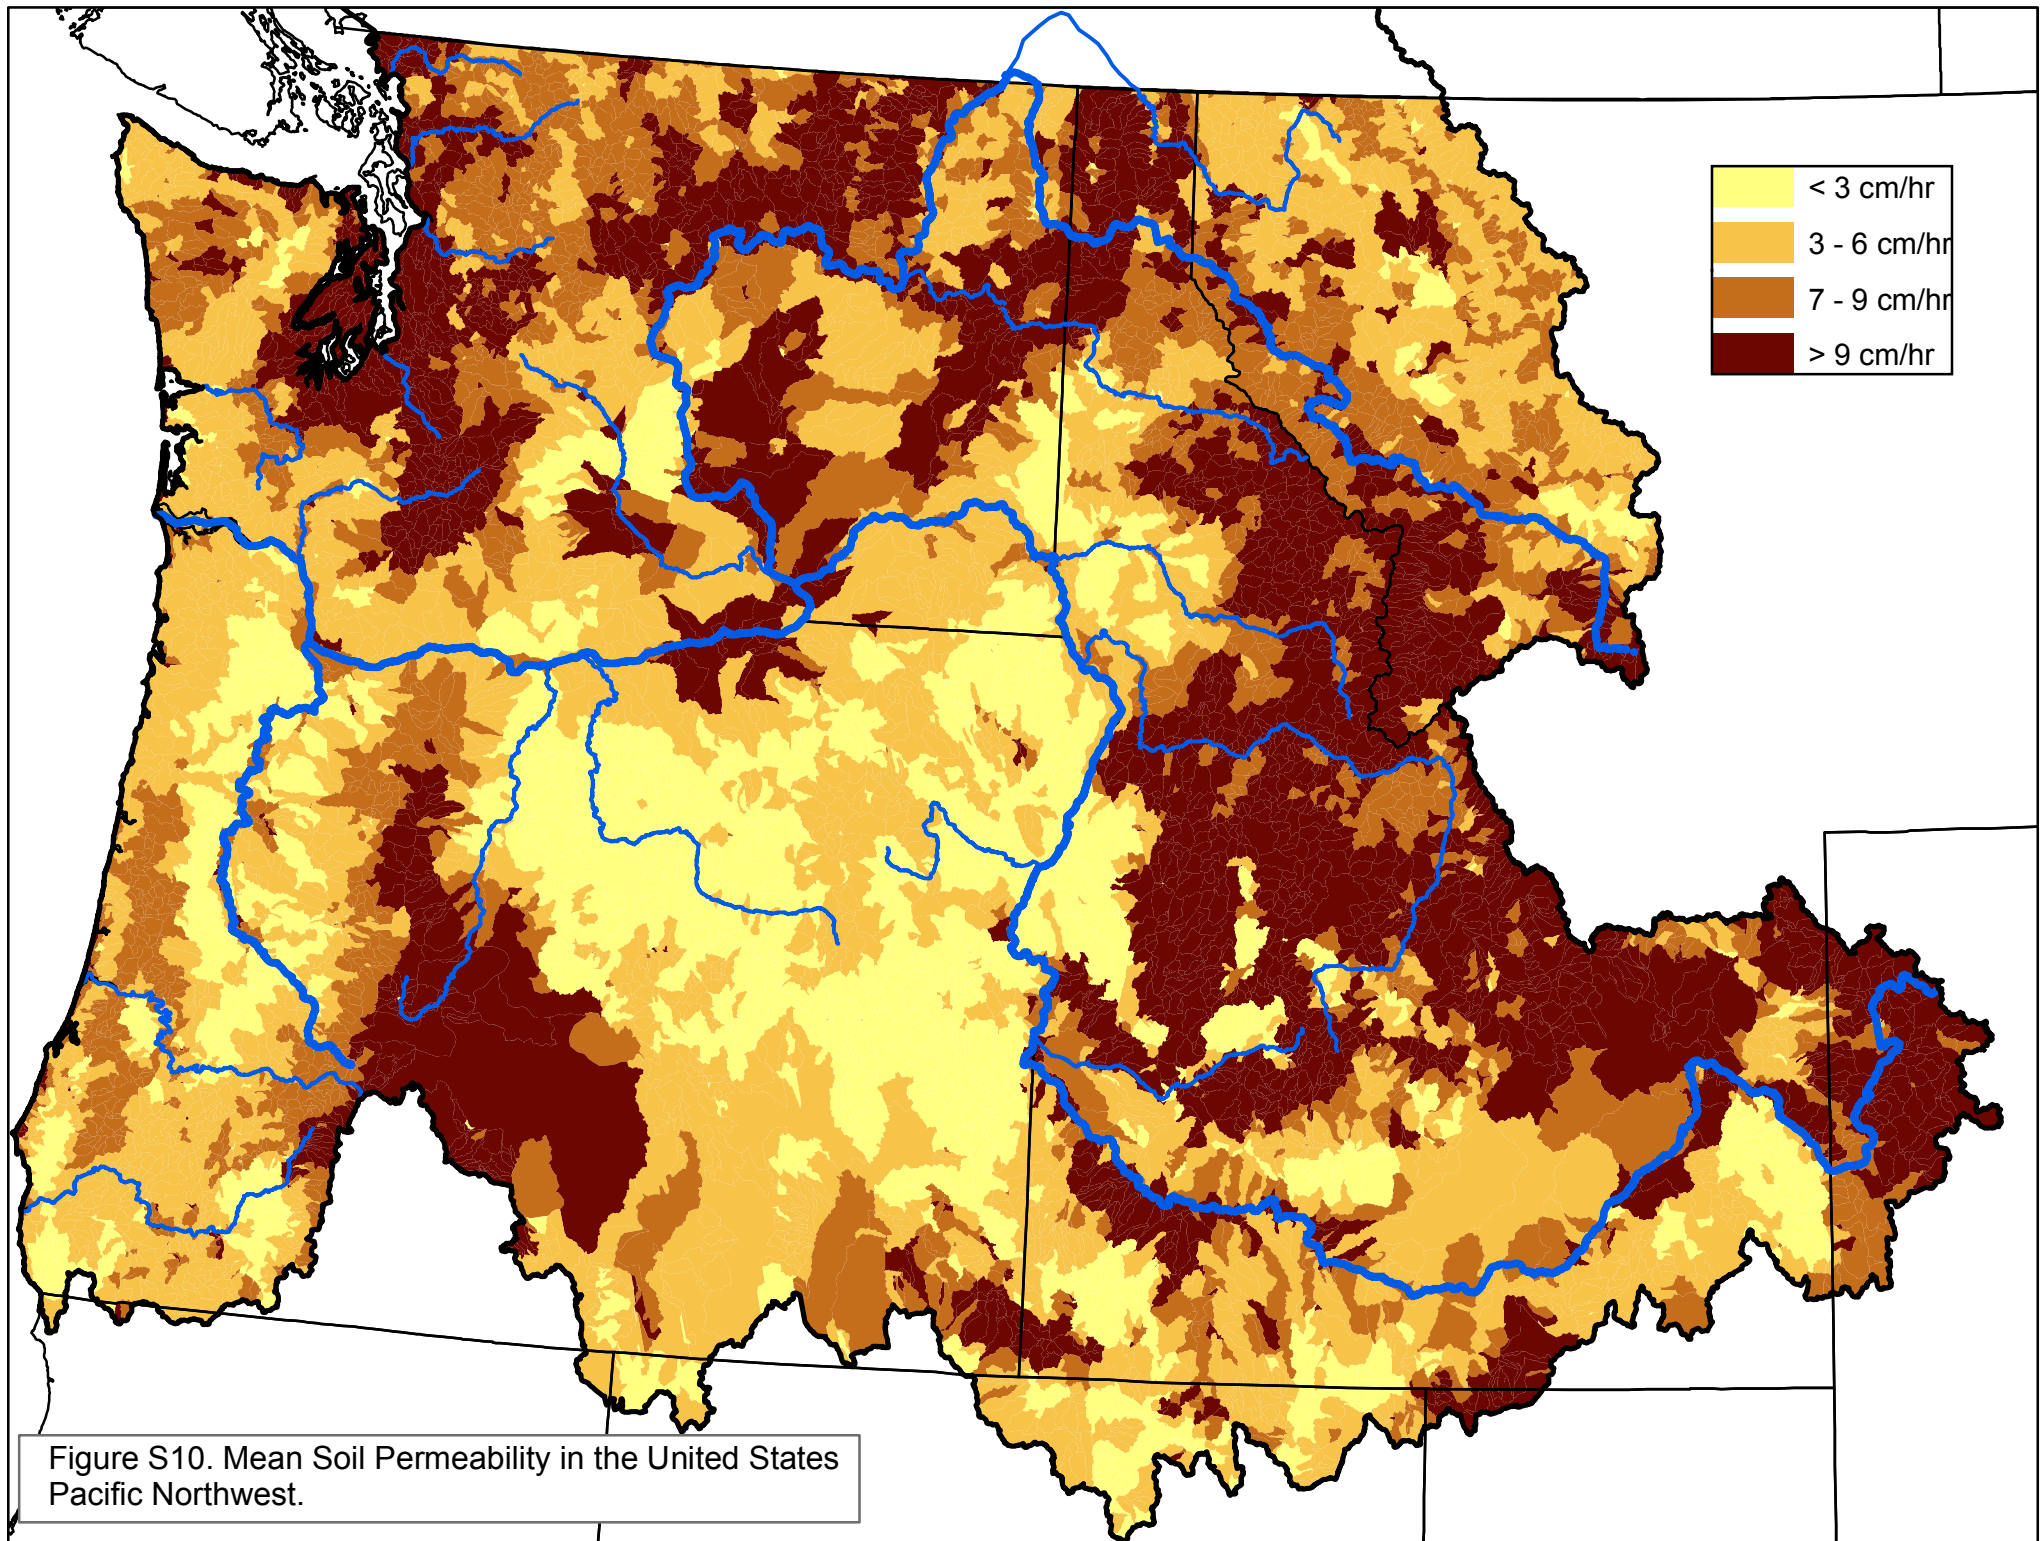

Figure S10. Mean Soil Permeability in the United States Pacific Northwest.

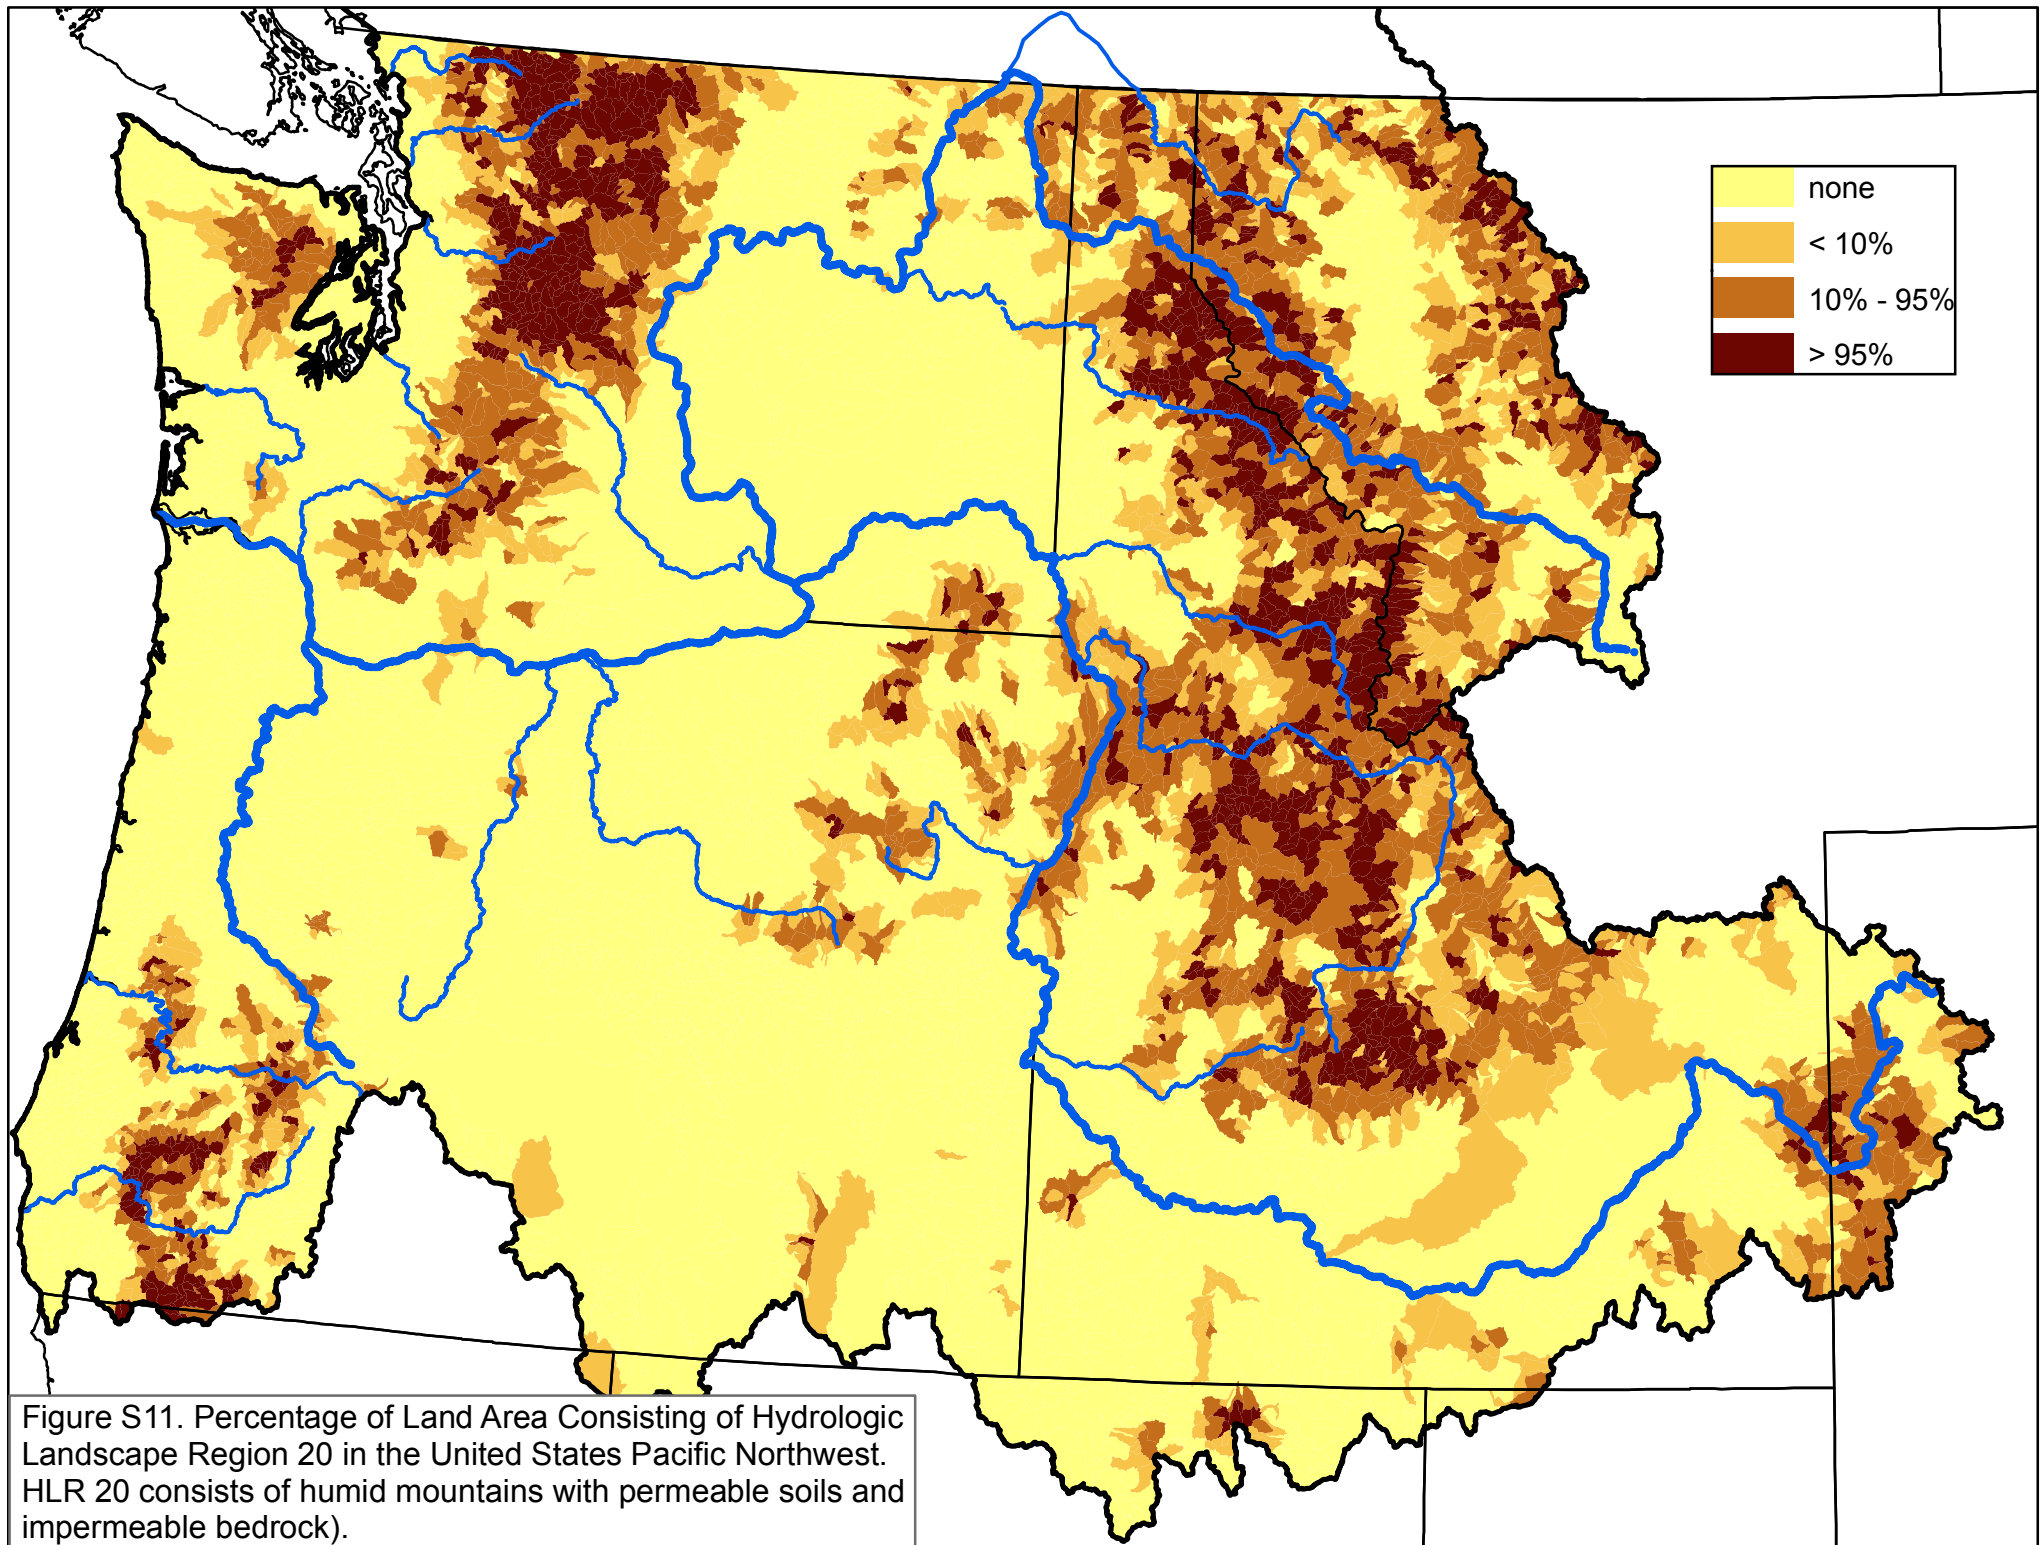

Figure S11. Percentage of Land Area Consisting of Hydrologic Landscape Region 20 in the United States Pacific Northwest. HLR 20 consists of humid mountains with permeable soils and impermeable bedrock).

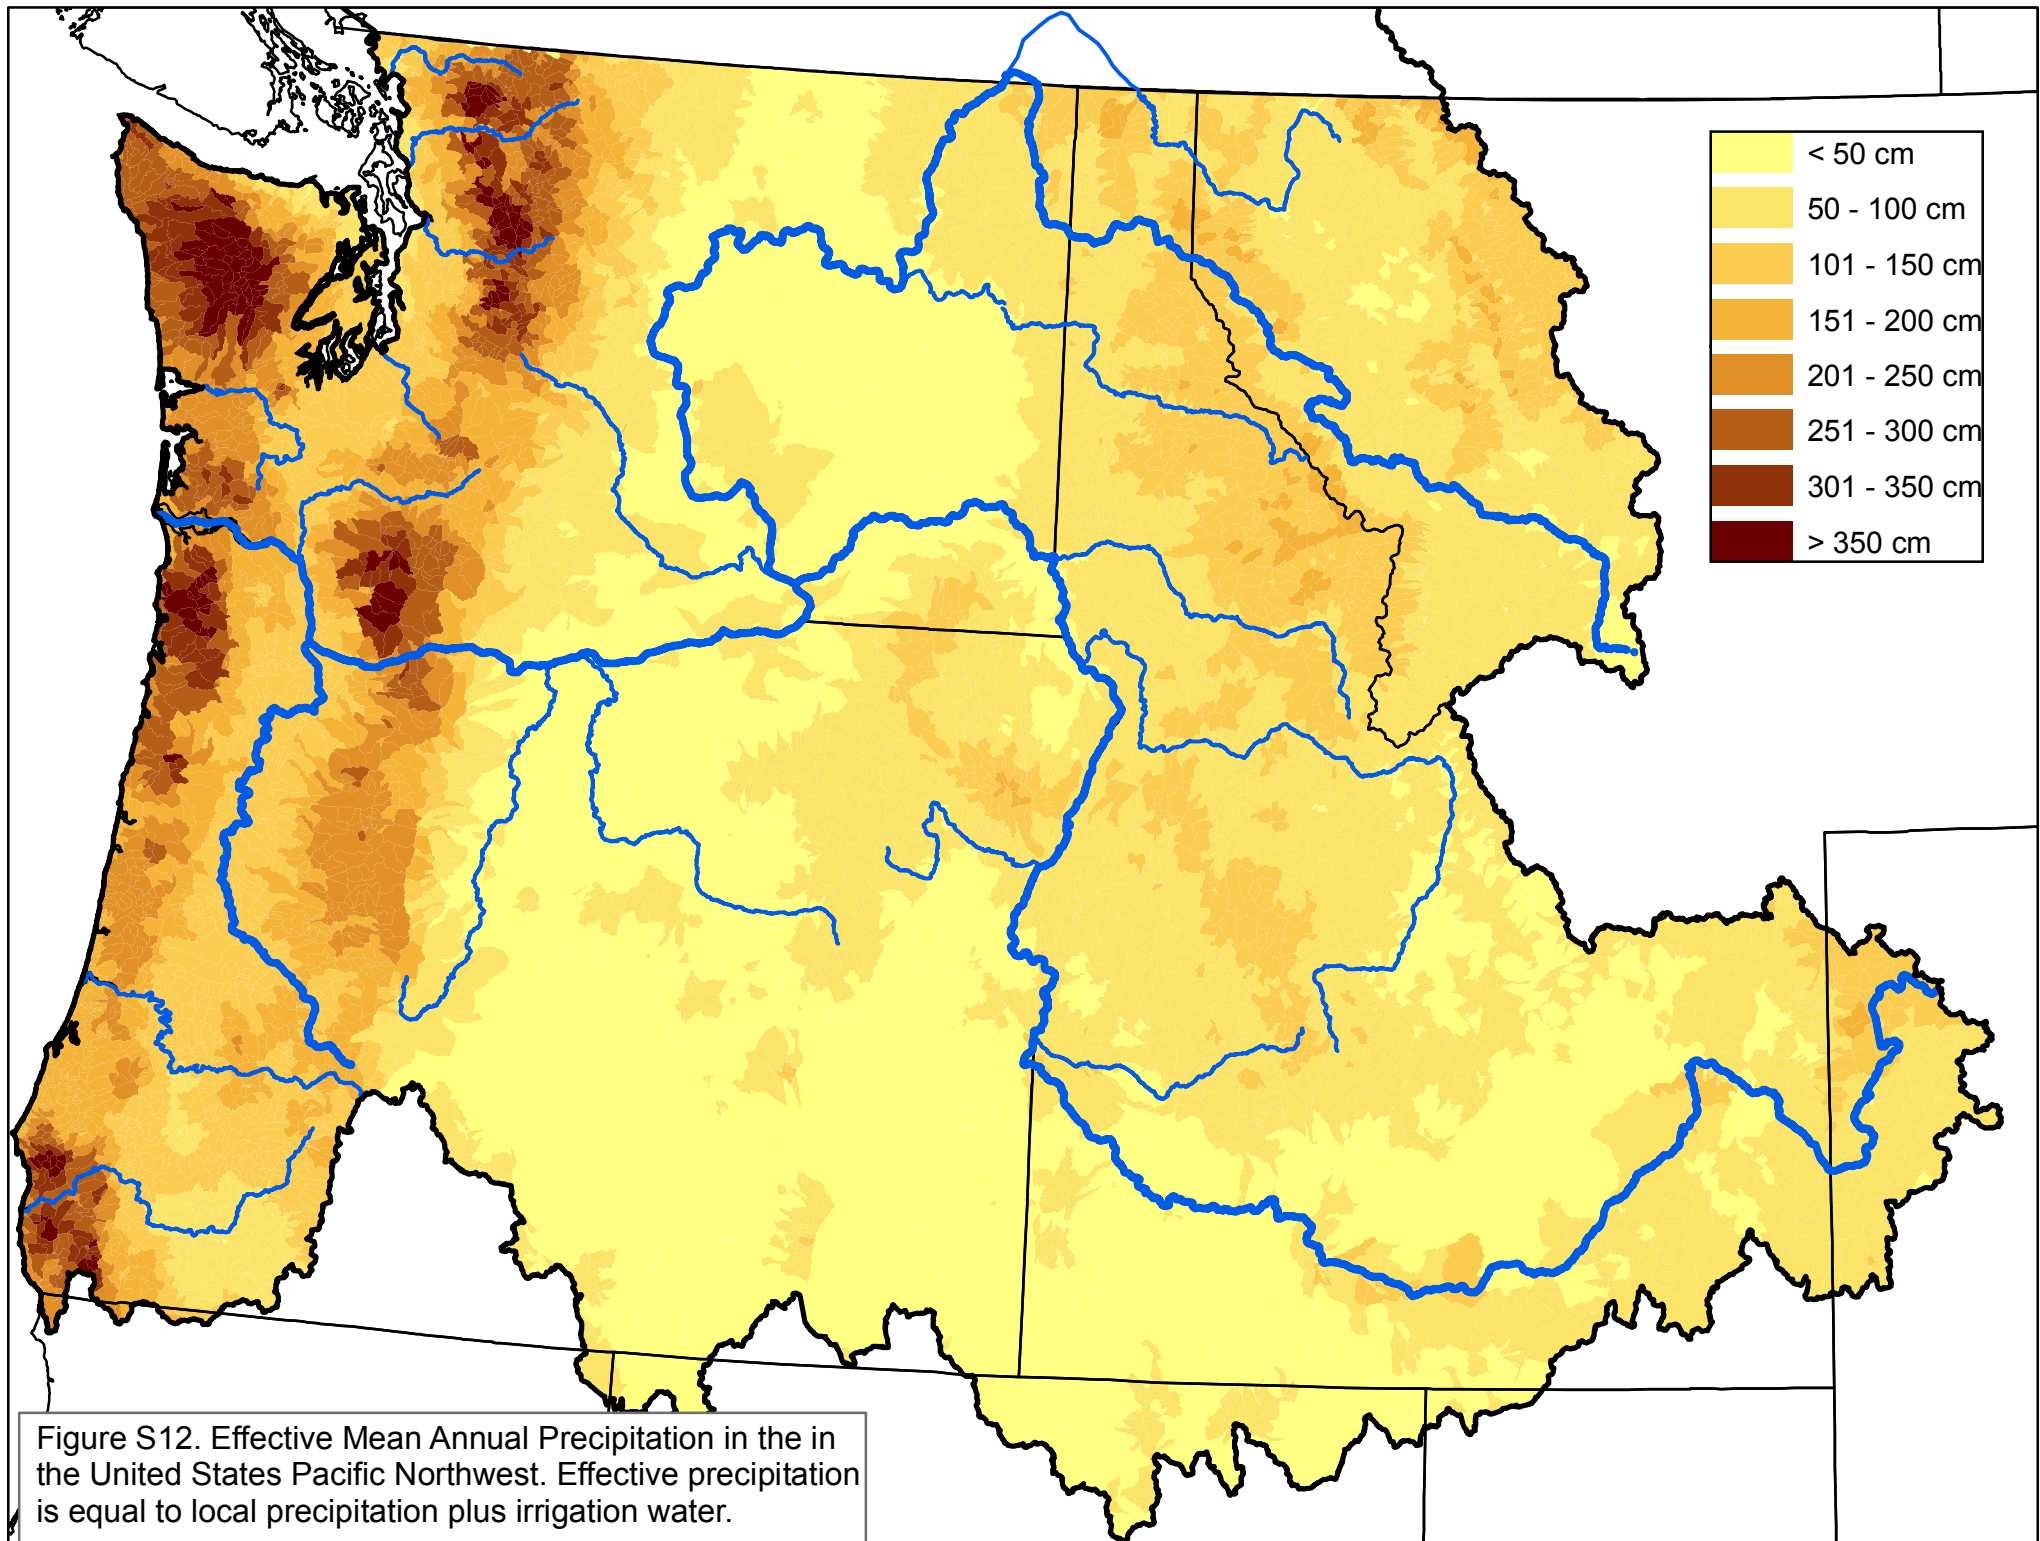

Figure S12. Effective Mean Annual Precipitation in the in the United States Pacific Northwest. Effective precipitation is equal to local precipitation plus irrigation water.

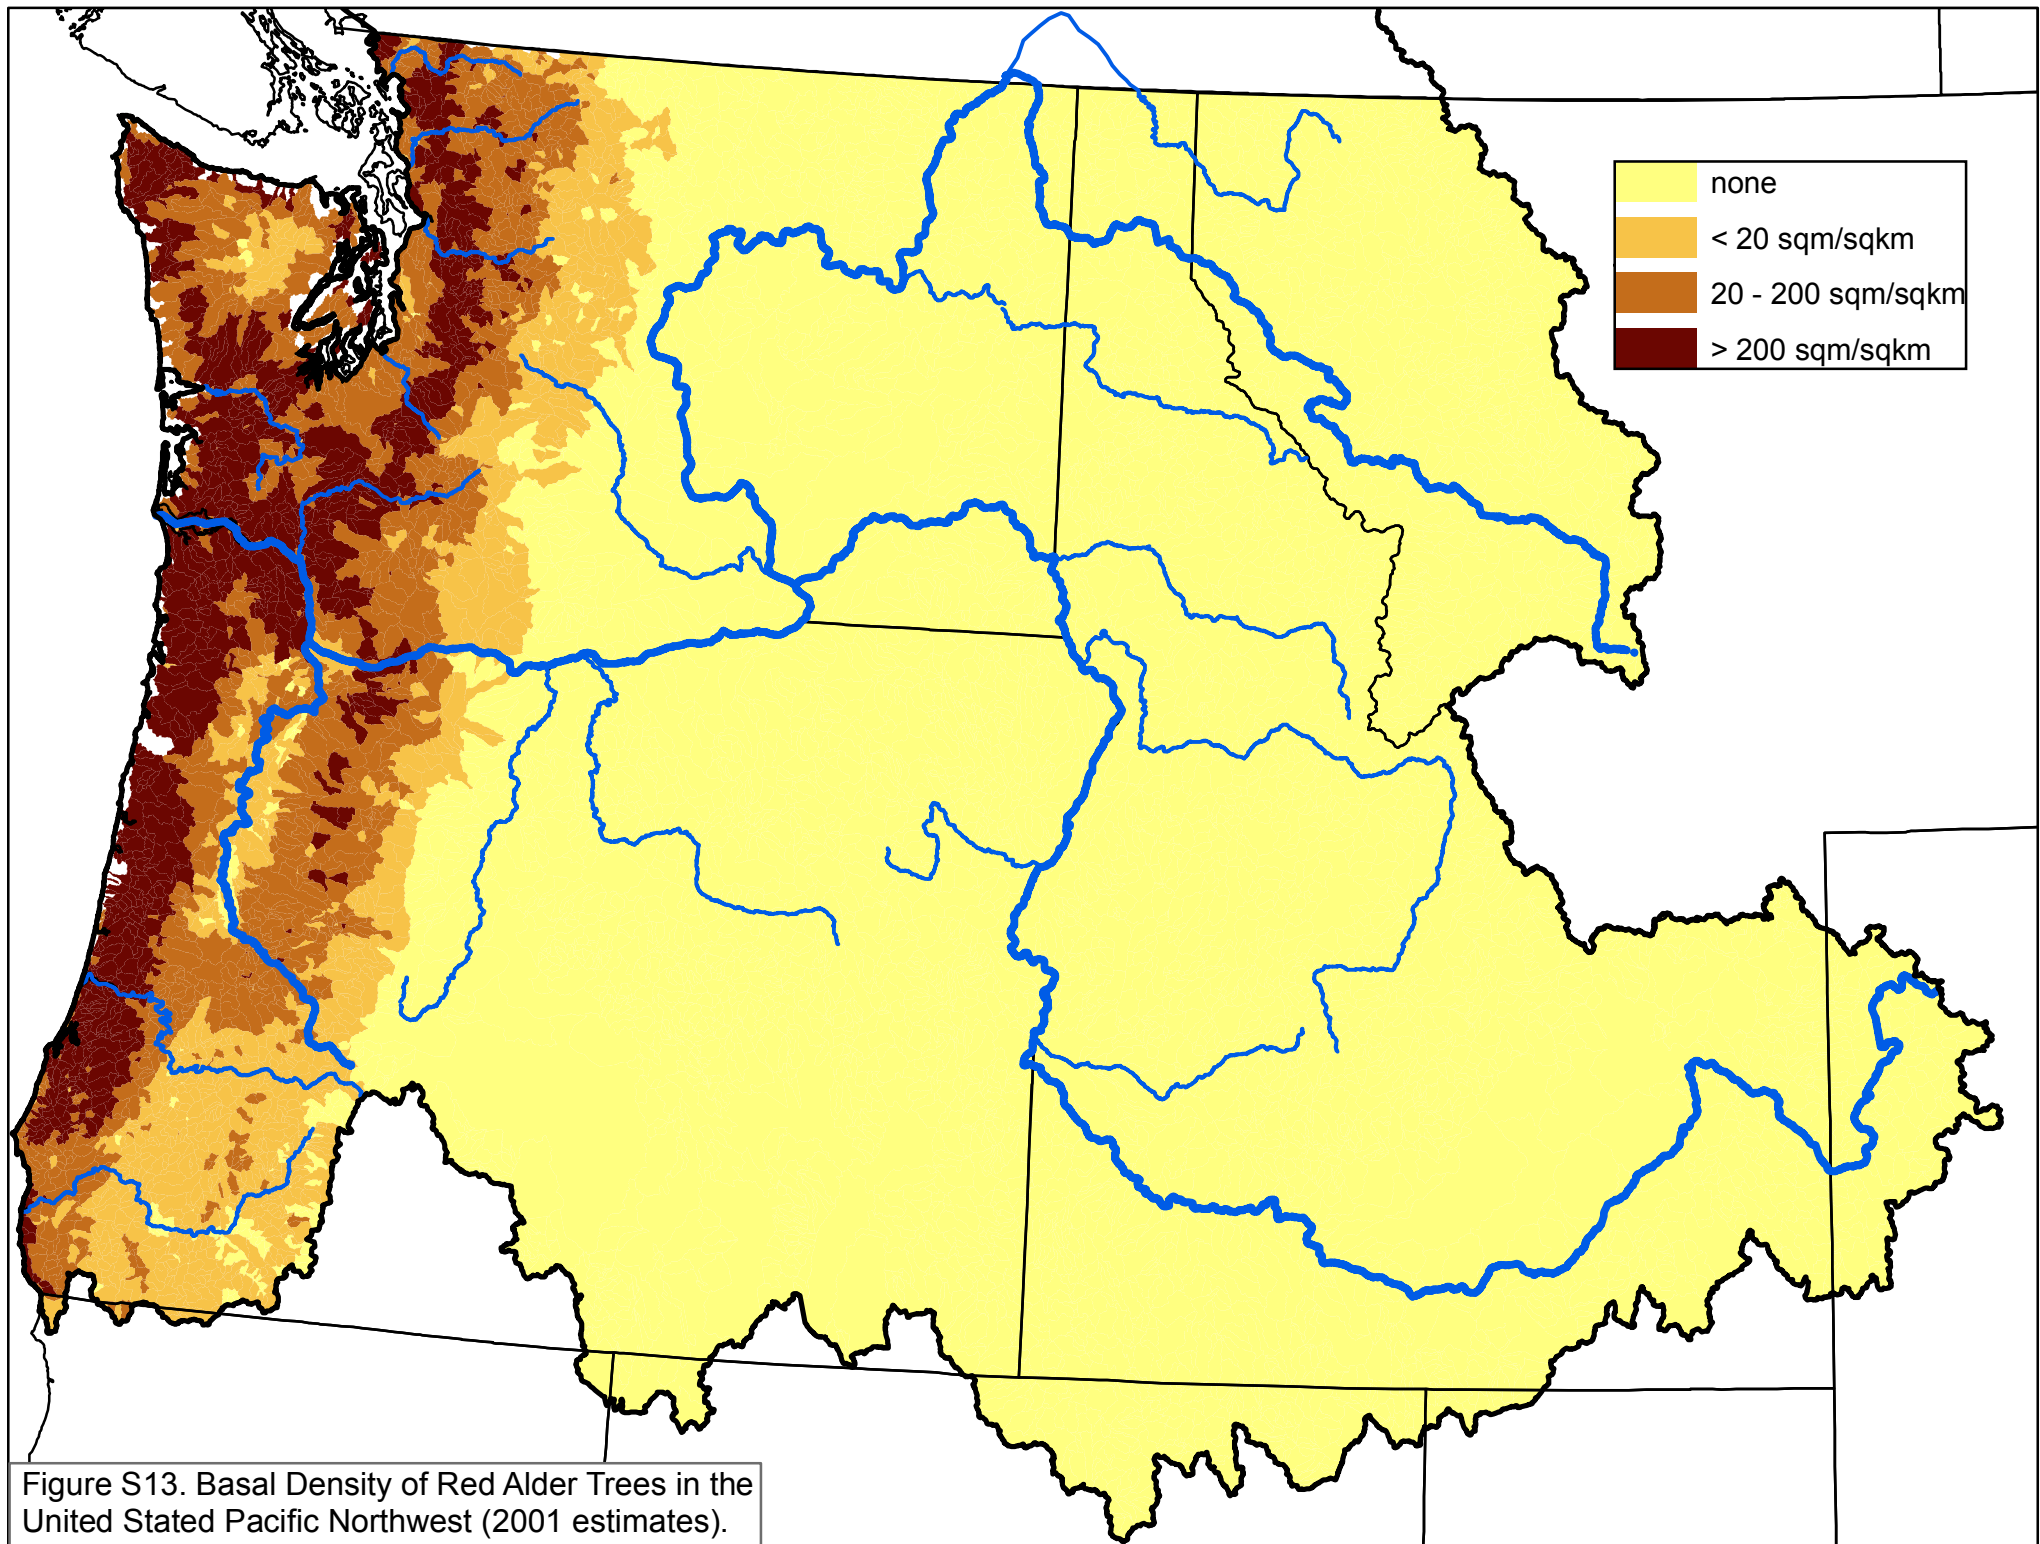

Figure S13. Basal Density of Red Alder Trees in the United States Pacific Northwest (2001 estimates).

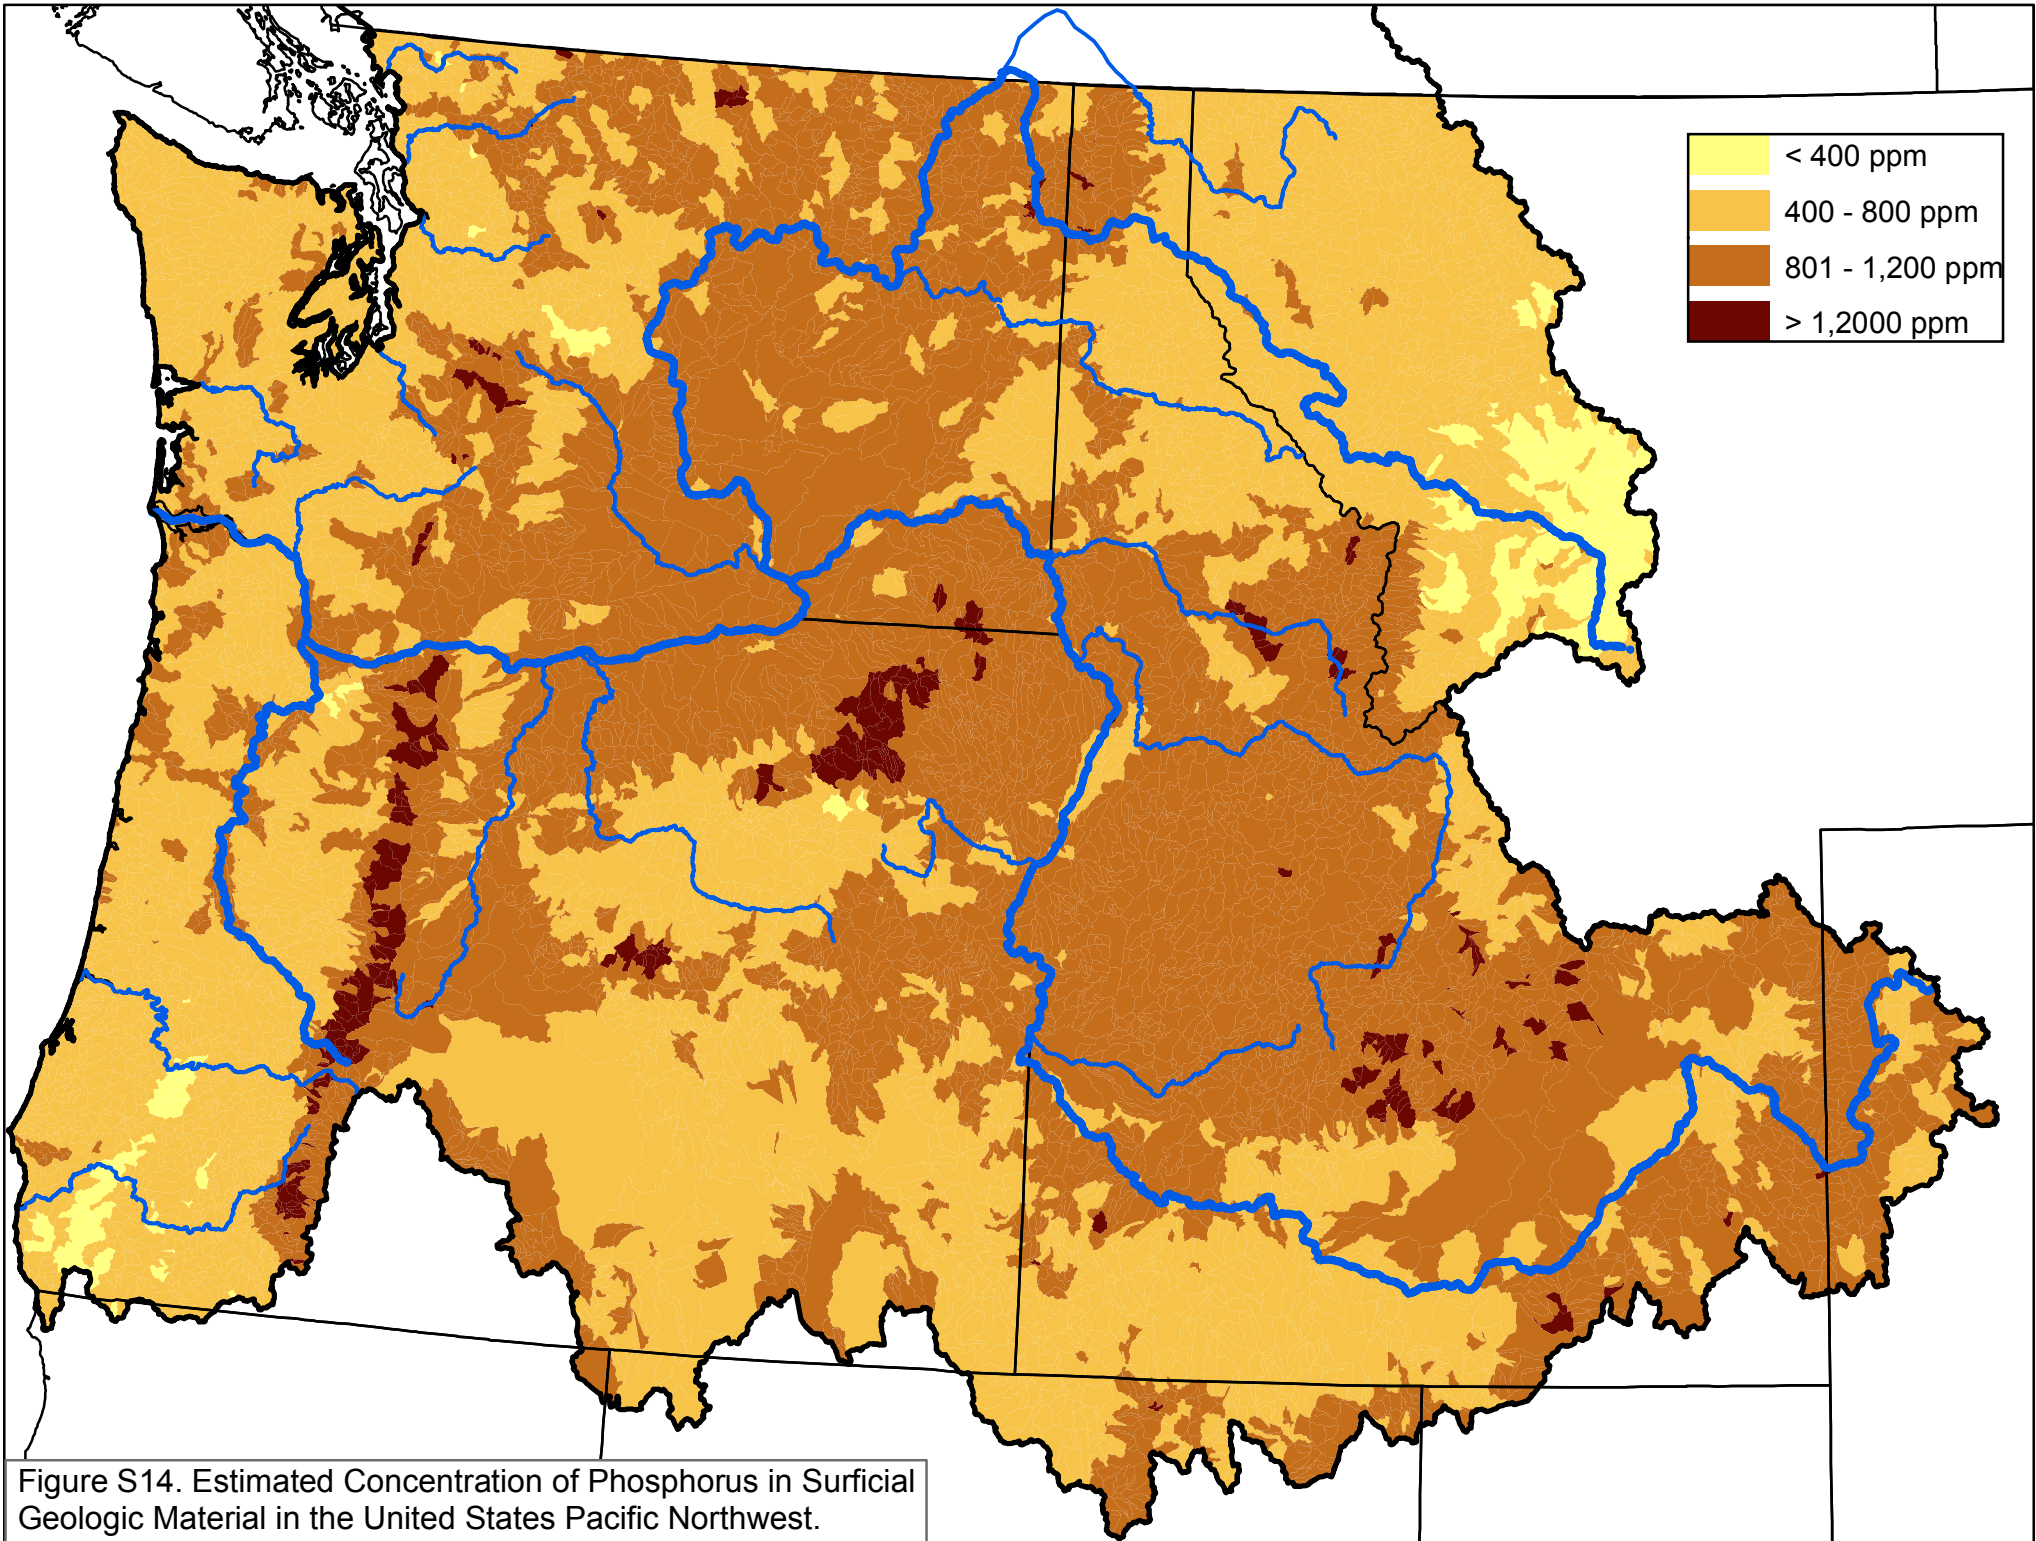

Figure S14. Estimated Concentration of Phosphorus in Surficial Geologic Material in the United States Pacific Northwest.

Figure S15. Measured Stream Load Relative to Predicted Stream Load for the Total Nitrogen SPARROW Model Developed for the United States Pacific Northwest.

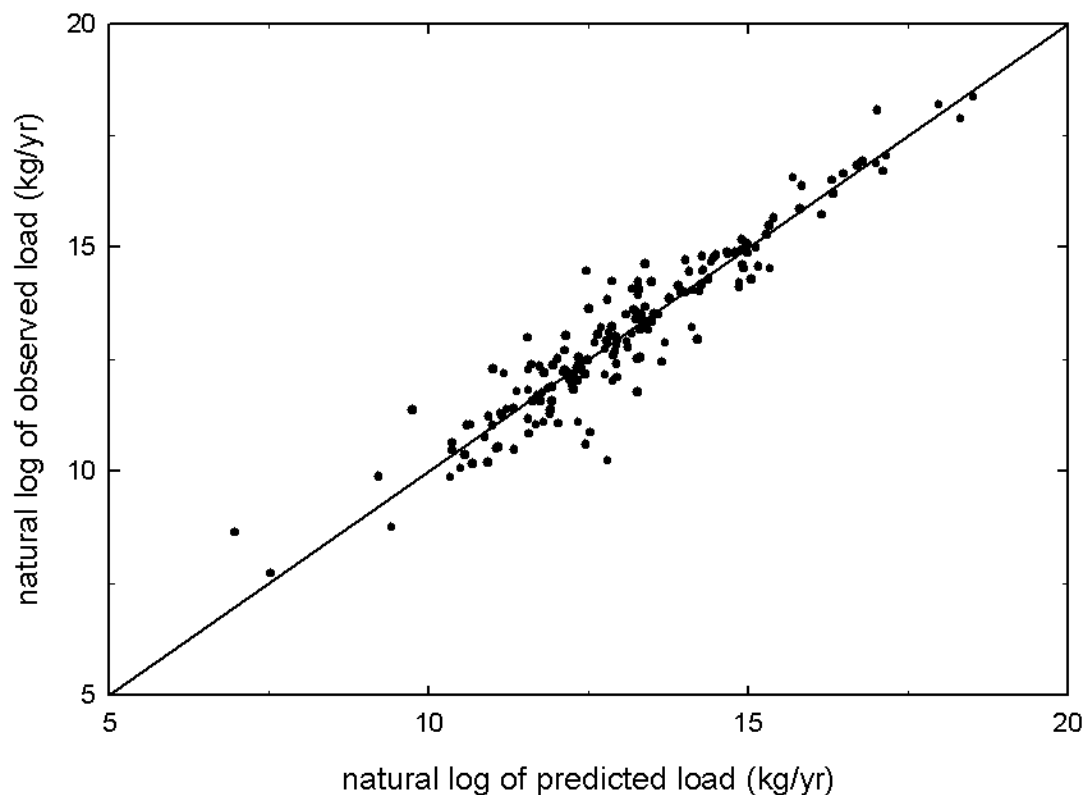



Figure S16. Residual Stream Load Relative to Stream Predicted Load to for the Total Nitrogen SPARROW Model Developed for the United States Pacific Northwest.

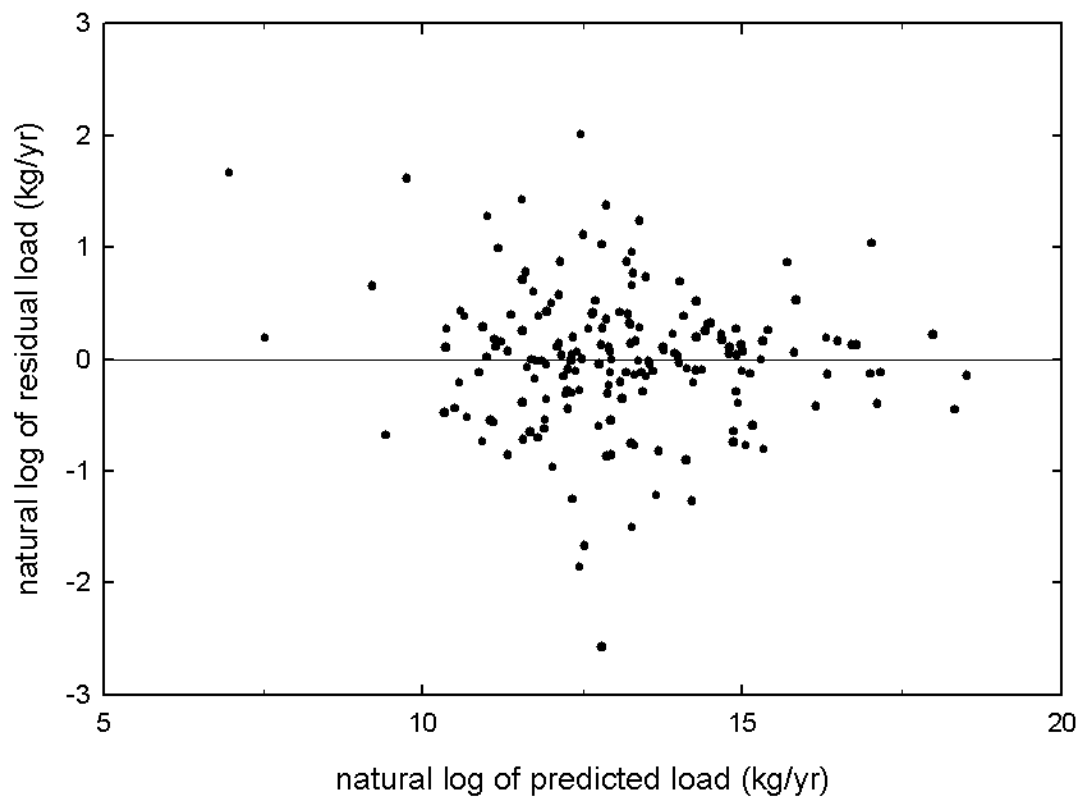

Figure S17. Residual Stream Load Relative to Predicted Yield for the Total Nitrogen SPARROW Model Developed for the United States Pacific Northwest.

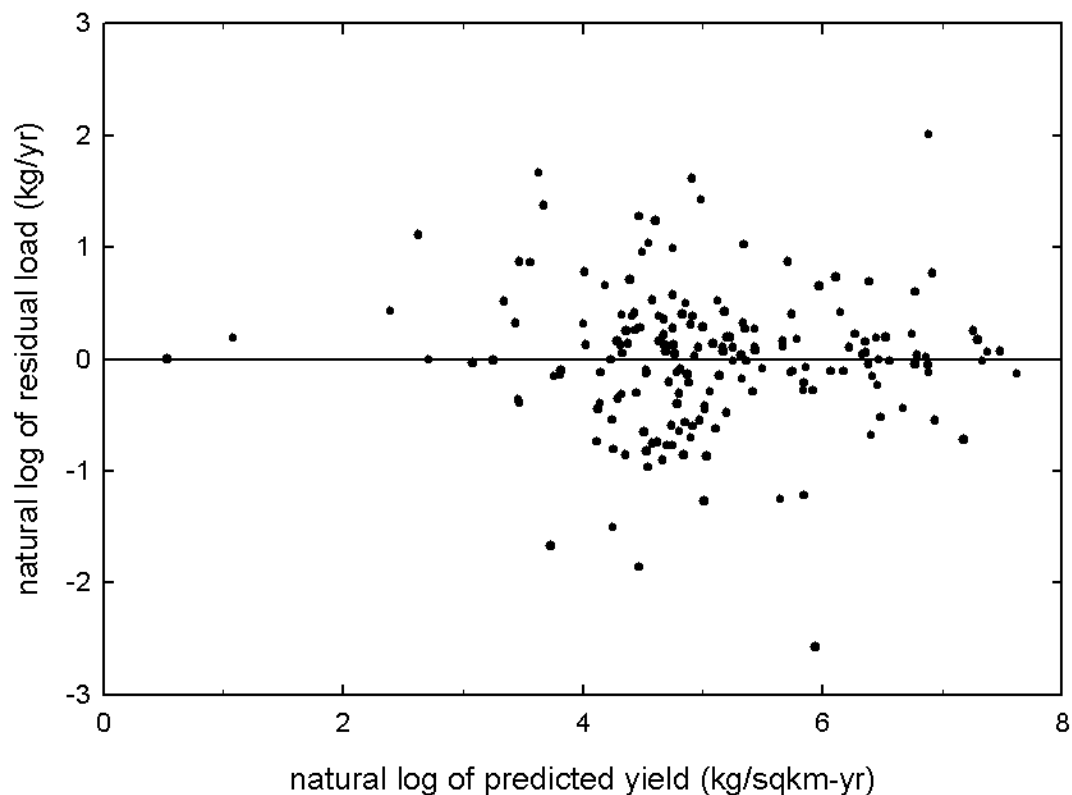

Figure S18. Probability Plot of Standardized Residual Stream Load for the Total Nitrogen SPARROW Model Developed for the United States Pacific Northwest.

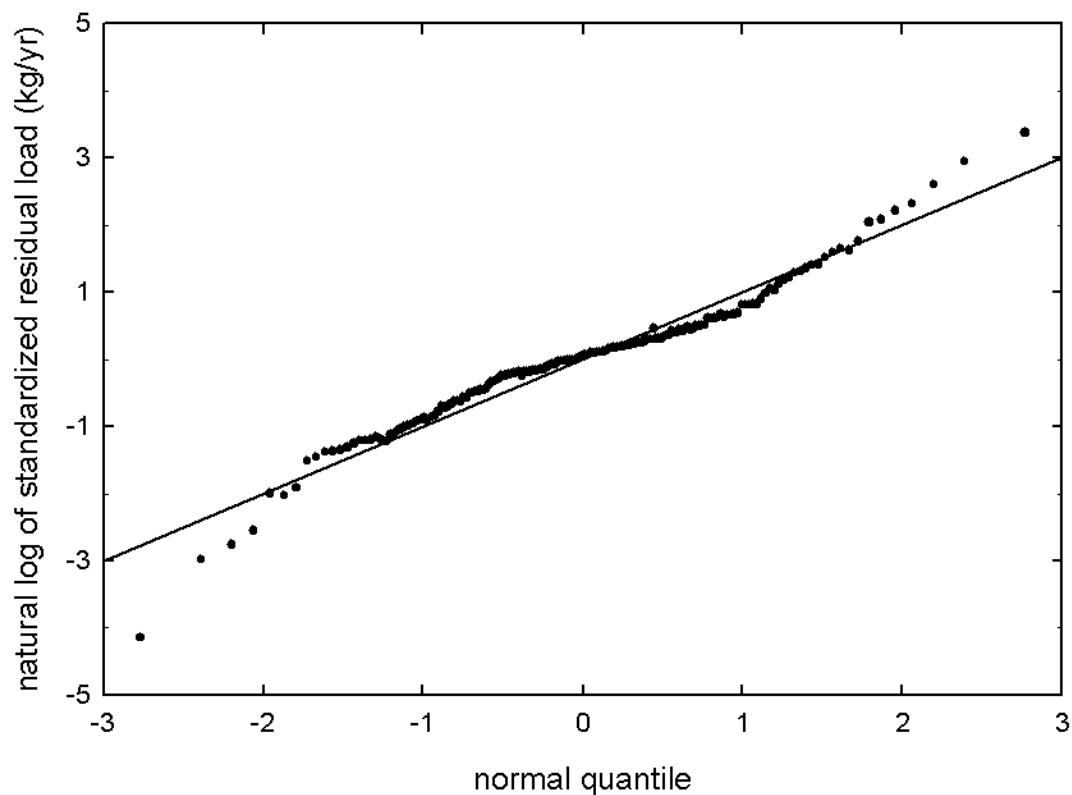

Figure S19. Measured Stream Load Relative to Predicted Stream Load for the Total Phosphorous SPARROW Model Developed for the United States Pacific Northwest.

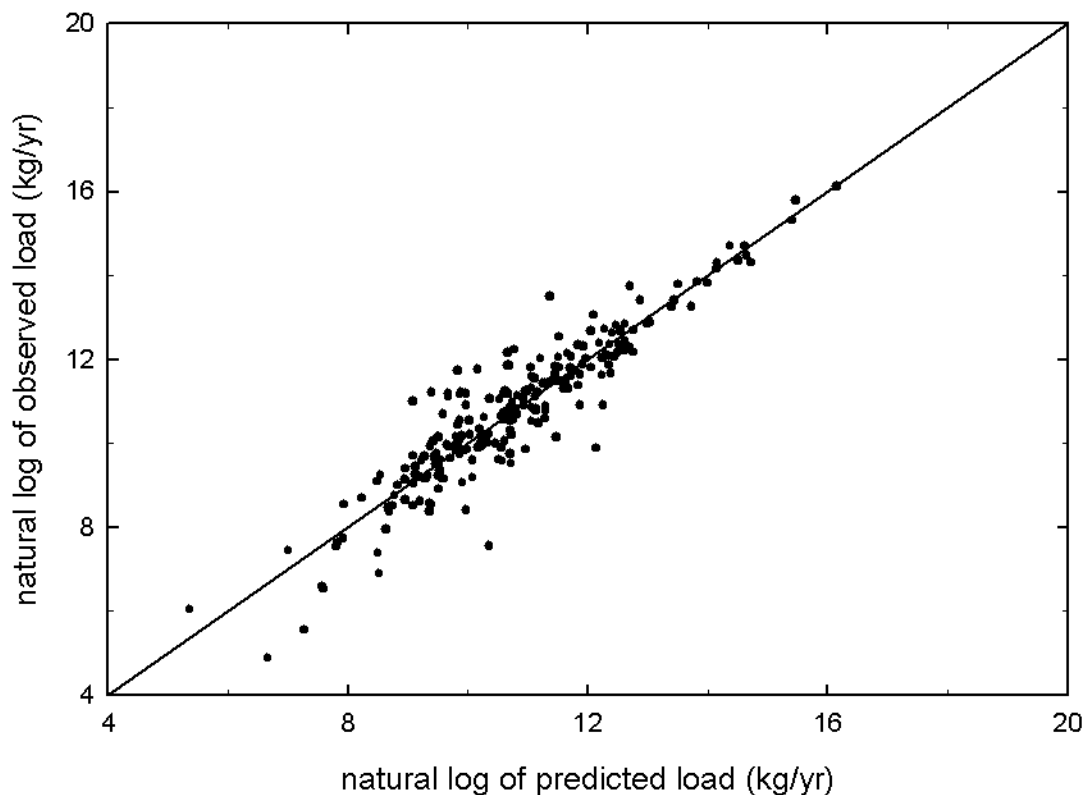

Figure S20. Residual Stream Load Relative to Predicted Stream Load for the Total Phosphorous SPARROW Model Developed for the United States Pacific Northwest.

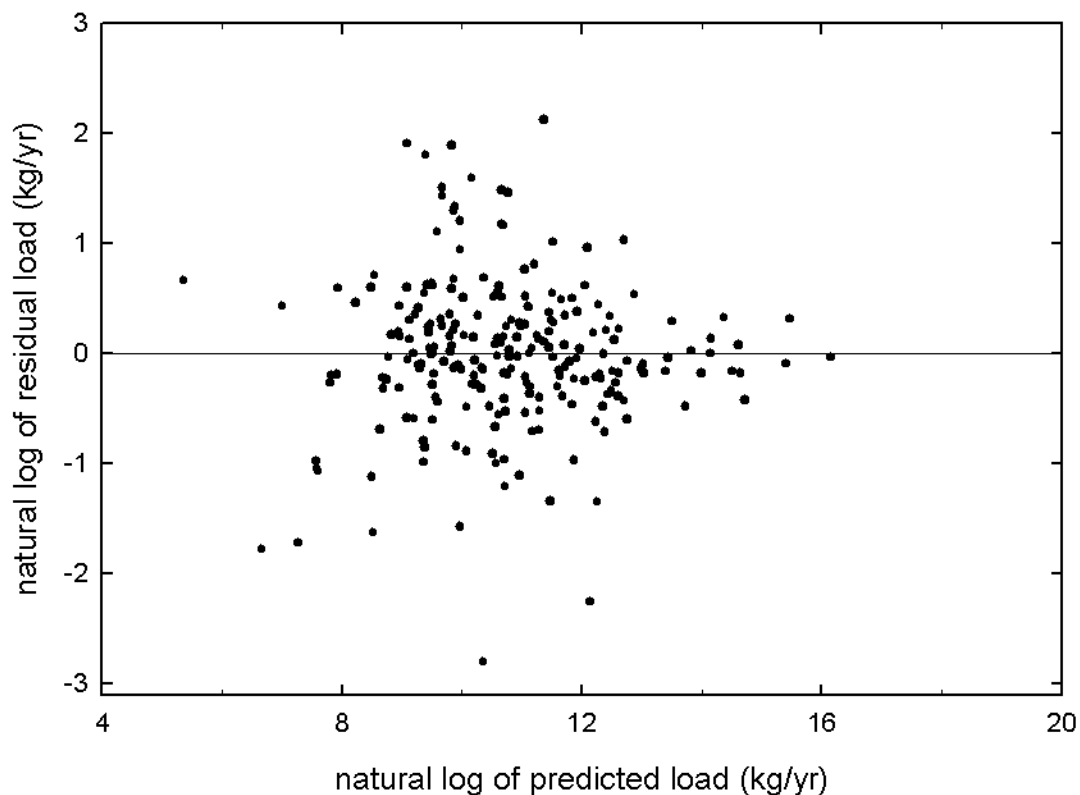

Figure S21. Residual Stream Load Relative to Predicted Yield for the Total Phosphorous SPARROW Model Developed for the United States Pacific Northwest.

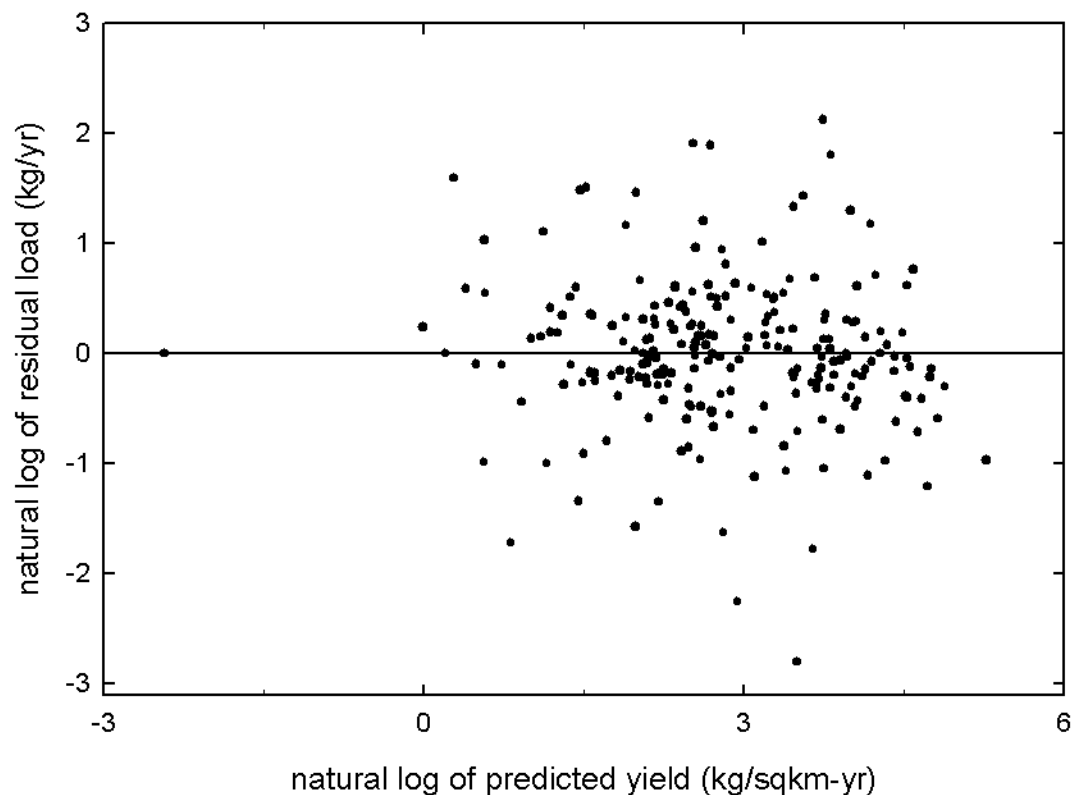

Figure S22. Probability Plot of Standardized Residual Stream Load for the Total Phosphorous SPARROW Model Developed for the United States Pacific Northwest.

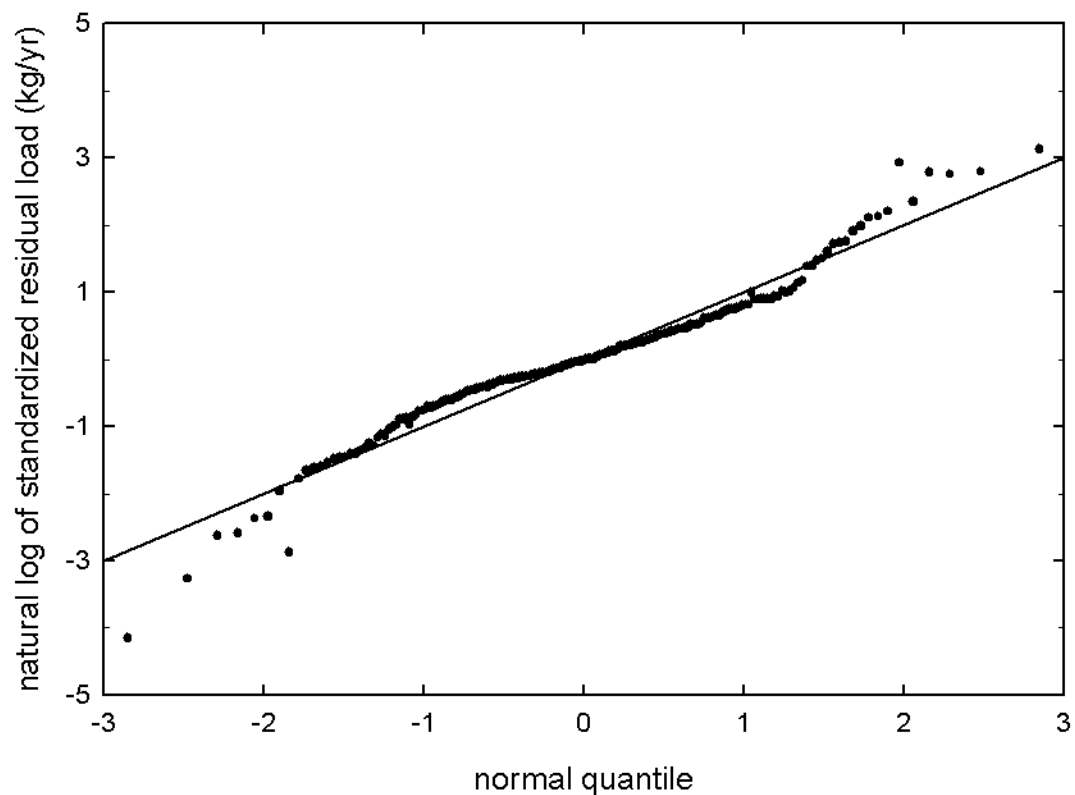

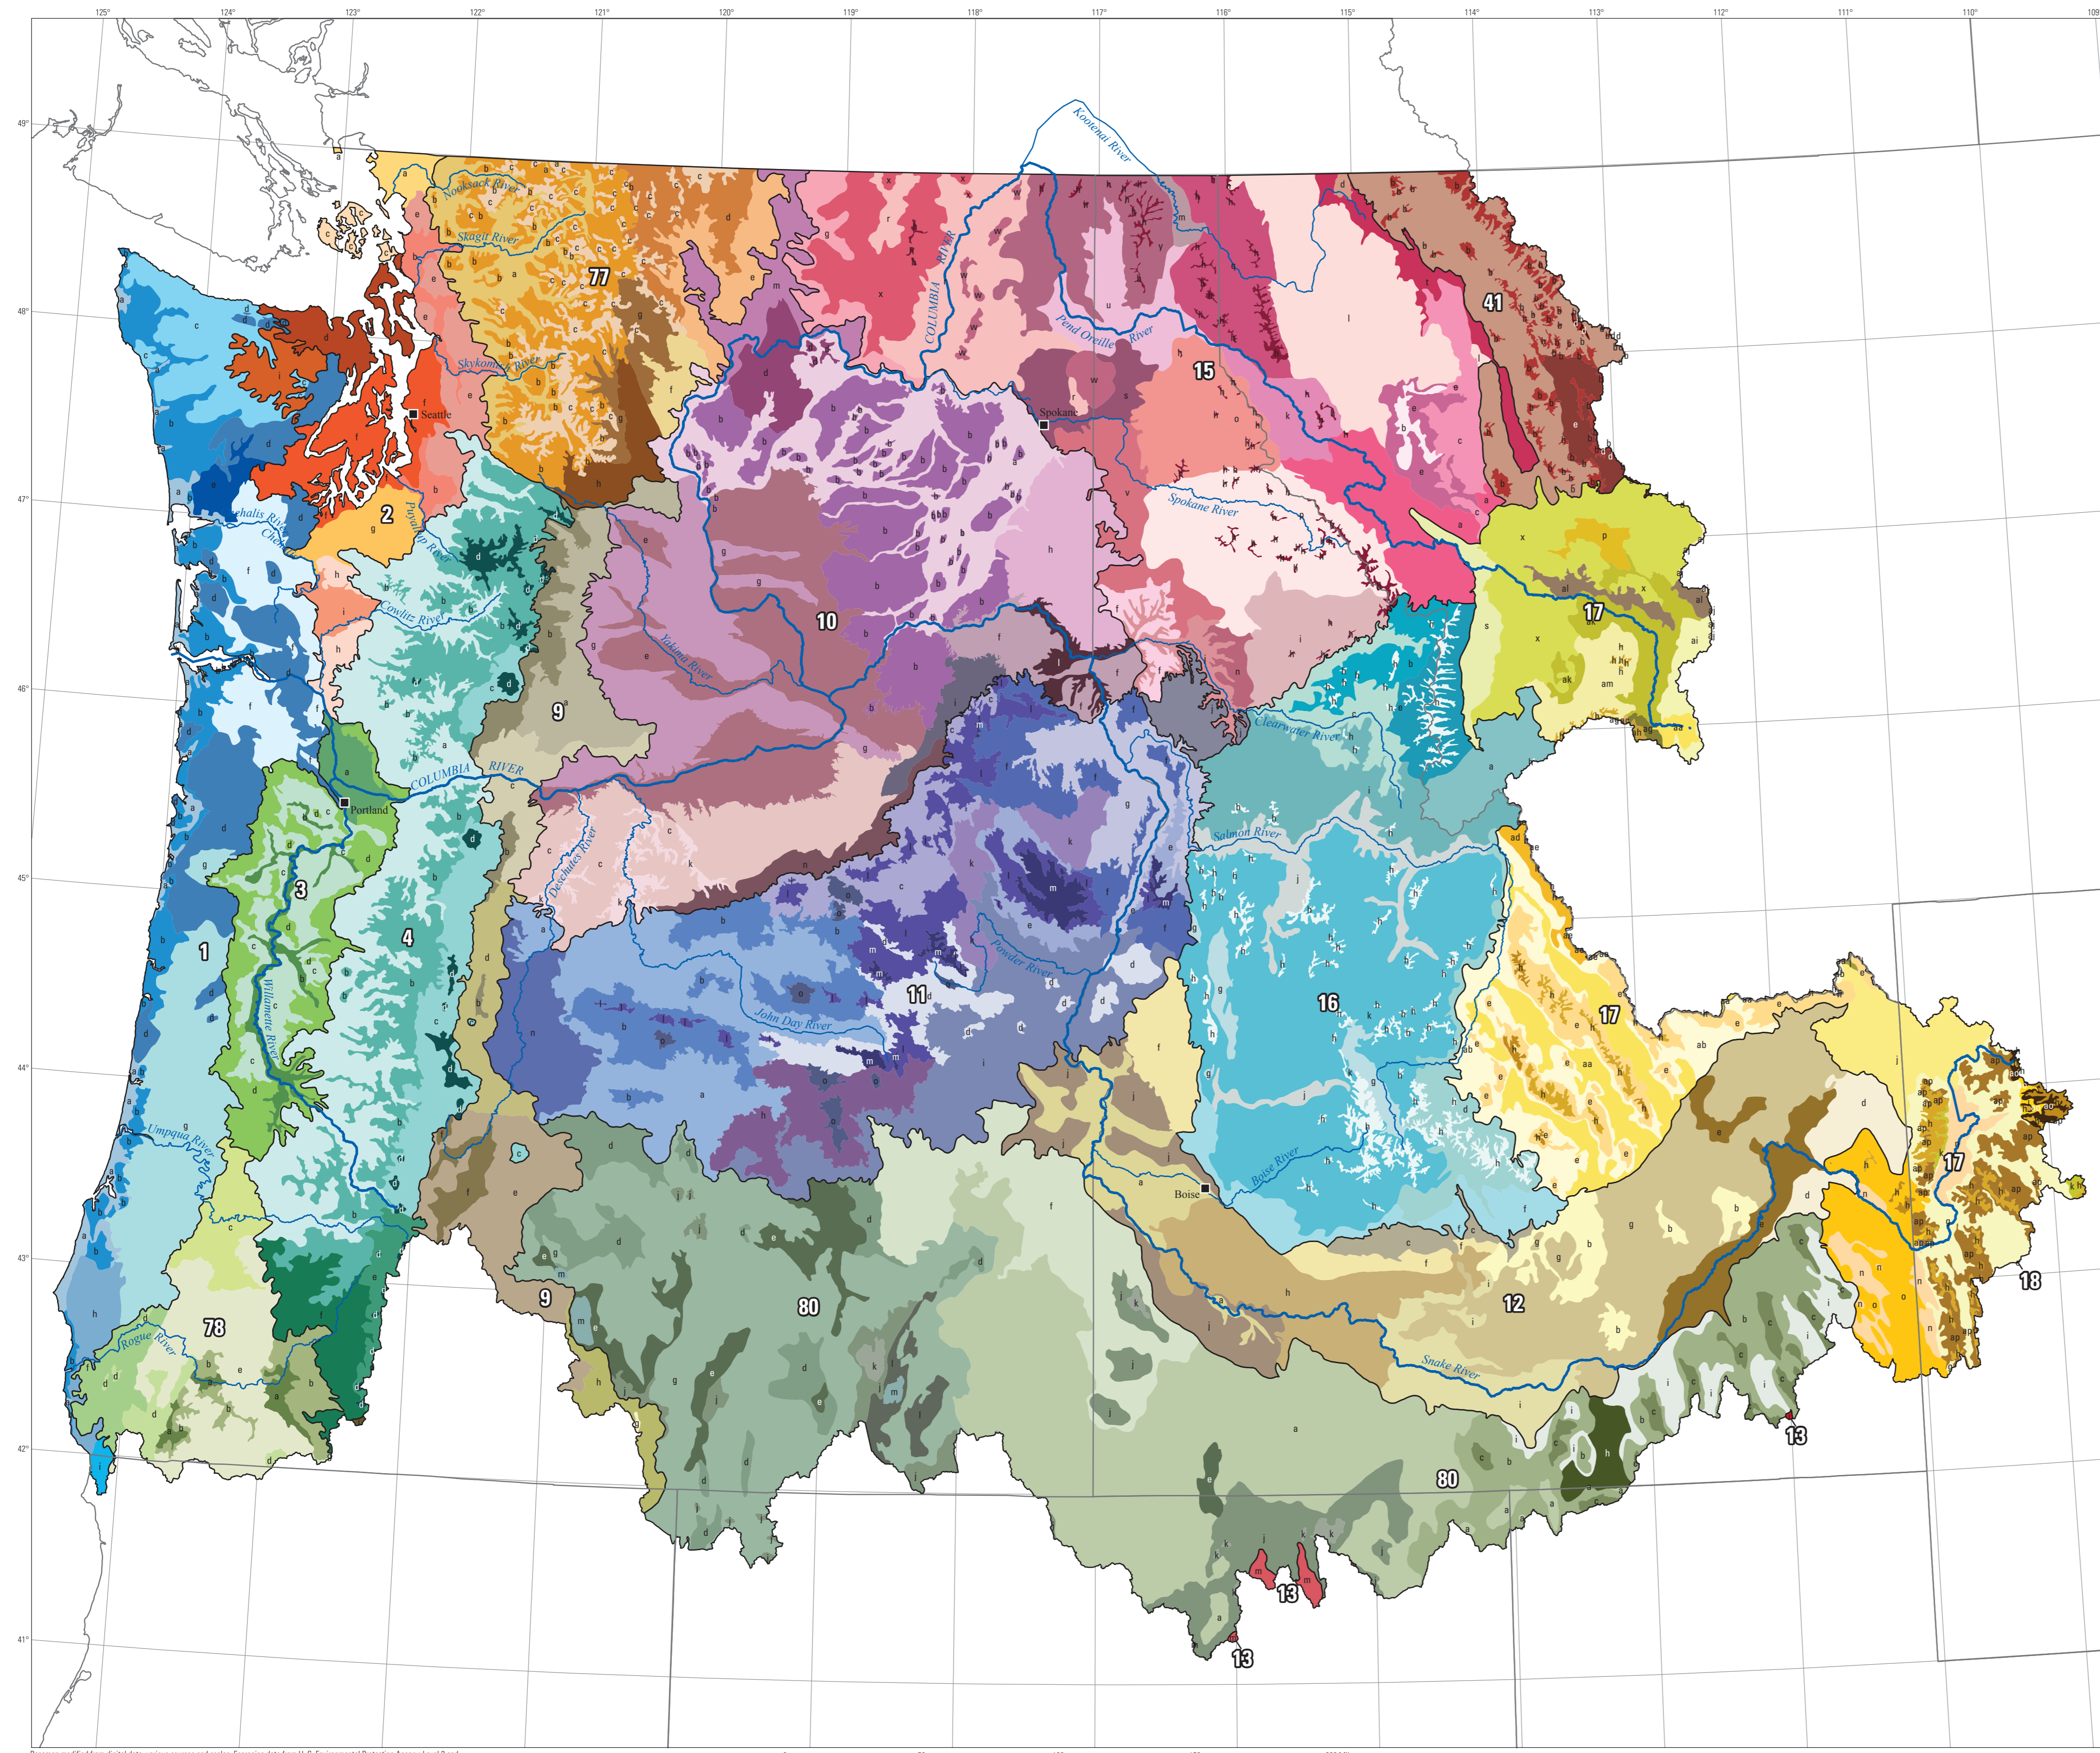

- 1 Coast Range**
- a. Coastal Lowlands
  - b. Coastal Uplands
  - c. Low Olympics
  - d. Volcanics
  - e. Outwash
  - f. Willapa Hills
  - g. Mid-Coastal Sedimentary
  - h. Southern Oregon Coastal Mountains
  - i. Redwood Zone
- 2 Puget Lowland**
- a. Fraser Lowland
  - b. Eastern Puget Riverine Lowlands
  - c. Olympic Rainshadow
  - d. Eastern Puget Uplands
  - e. Central Puget Lowland
  - f. Southern Puget Prairies
  - g. Covilitz/Chetahlis Foothills
  - h. Covilitz/Newaukum Prairie Floodplains
- 3 Willamette Valley**
- a. Portland/Vancouver Basin
  - b. Willamette River and Tributaries Gallery Forest
  - c. Prairie Terraces
  - d. Valley Foothills
- 4 Cascades**
- a. Western Cascades Lowlands and Valleys
  - b. Western Cascades Montane Highlands
  - c. Cascade Crest Montane Forest
  - d. Cascade Subalpine/Alpine
  - e. High Southern Cascades Montane Forest
  - f. Southern Cascades
- 9 Eastern Cascades Slopes and Foothills**
- a. Yakima Plateau & Slopes
  - b. Grand Fir Mixed Forest
  - c. Oak/Conifer Foothills
  - d. Ponderosa Pine/Bitterbrush Woodland
  - e. Pumice Plateau
  - f. Pumice Plateau Basins
  - g. Klamath/Goose Lake Basins
  - h. Fremont Pine/Fir Forest
  - i. Southern Cascade Slope
- 10 Columbia Plateau**
- a. Channelled Scablands
  - b. Loess Islands
  - c. Umatilla Plateau
  - d. Okanogan Drift Hills
  - e. Pleistocene Lake Basins
  - f. Dissected Loess Uplands
  - g. Yakima Folds
  - h. Palouse Hills
  - i. Deep Loess Foothills
  - j. Nez Perce Prairie
  - k. Deschutes/John Day Canyons
  - l. Lower Snake and Clearwater Canyons
  - m. Okanogan Valley
  - n. Umatilla Dissected Uplands

- 11 Blue Mountains**
- a. John Day/Clearwater Uplands
  - b. John Day/Clearwater Highlands
  - c. Maritime-Influenced Canyons
  - d. Melange
  - e. Willows/Seven Devils Mountains
  - f. Canyons and Dissected Highlands
  - g. Canyons and Dissected Uplands
  - h. Continental Zone Highlands
  - i. Continental Zone Foothills
  - j. Blue Mountain Basins
  - k. Blue Mountain Basins
  - l. Mesic Forest Zone
  - m. Subalpine-Alpine Zone
  - n. Deschutes River Valley
  - o. Cold Basins
- 12 Snake River Plain**
- a. Treasure Valley
  - b. Lava Fields
  - c. Camas Prairie
  - d. Dissected Plateaus and Teton Basin
  - e. Upper Snake River Plain
  - f. Semiarid Foothills
  - g. Eastern Snake River Basalt Plains
  - h. Mountain Home Uplands
  - i. Magic Valley
  - j. Unwooded Alkaline Foothills
- 13 Central Basin and Range**
- a. Malad and Cache Valleys
  - b. Upper Humboldt Plains
- 15 Northern Rockies**
- a. Grav Creek Range-Nine Mile Divide
  - b. Camas Valley
  - c. Flathead Valley
  - d. Tobacco Plains
  - e. Flathead Hills and Mountains
  - f. Grassy Pothole Ridges
  - g. Western Okanogan Semiarid Foothills
  - h. High Northern Rockies
  - i. Clearwater Mountains and Breaks
  - j. Lower Clearwater Canyons
  - k. Clark Fork Valley and Mountains
  - l. Salish Mountains
  - m. Kootenai Valley
  - n. Weippe Prairie
  - o. Couer d'Alene Metasedimentary Zone
  - p. St. Joe Schist-Gneiss Zone
  - q. Purcell-Cabinet-North Bitterroot Mountains
  - r. Okanogan-Colville Xeric Valleys and Foothills
  - s. Spokane Valley Outwash Plains
  - t. Stillwater-Swan Wooded Valley
  - u. Inland Maritime Foothills and Valleys
  - v. Northern Idaho Hills and Low Relief Mountains
  - w. Western Selkirk Maritime Forest
  - x. Okanogan Highland Dry Forest
  - y. Granitic Selkirk Mountains

- 16 Idaho Batholith**
- a. Eastern Batholith
  - b. Lochsa Uplands
  - c. Lochsa-Selway-Clearwater Canyons
  - d. Dry Partly Wooded Mountains
  - e. Glaciated Bitterroot Mountains and Canyons
  - f. Foothill Shrublands-Grasslands
  - g. Canyons and Dissected Uplands
  - h. High Glacial Drift-Filled Valleys
  - i. High Idaho Batholith
  - j. South Clearwater Forested Mountains
  - k. Hot Dry Canyons
  - l. Southern Forested Mountains
- 17 Middle Rockies**
- aa. Dry Intermontane Sagebrush Valleys
  - ab. Dry Gneissic-Schistose-Volcanic Hills
  - ac. Big Hole
  - ad. Western Beaverhead Mountains
  - ae. Forested Beaverhead Mountains
  - ag. Pioneer-Anaconda Ranges
  - ah. Eastern Pioneer Sedimentary Mountains
  - ai. Elkhorn Mountains-Boulder Batholith
  - aj. Eastern Divide Mountains
  - ak. Deer Lodge-Phillipsburg-Avon Grassy Intermontane Hills and Valleys
  - al. Mountain Home Uplands
  - am. Southern Garnet Sedimentary-Volcanic Mountains
  - an. Flint Creek-Anaconda Mountains
  - ao. Absaroka Volcanic Subalpine Zone
  - ap. Absaroka-Gallatin Volcanic Mountains
  - aq. High Elevation Rockland Alpine Zone
  - ar. Sedimentary Subalpine Zone
  - as. Barren Mountains
  - at. Mid-elevation Sedimentary Mountains
  - au. Alpine Zone
  - av. High Elevation Rockland Alpine Zone
  - aw. Absaroka-Gallatin Volcanic Mountains
  - ax. Granitic Subalpine Zone
  - ay. Gneissic-Schistose Forested Mountains
  - az. Cold Valleys
  - ba. Partly Forested Mountains
  - bb. Foothill Potholes
  - bc. Bitterroot-Frenchtown Valley
  - bd. Rattlesnake-Blackfoot-South Swan-Northern Garnet-Sapphire Mountains
- 18 Wyoming Basin**
- ic. Sub-irrigated High Valleys

- 41 Canadian Rockies**
- a. Eastern Batholith
  - b. Western Canadian Rockies
  - c. Lochsa-Selway-Clearwater Canyons
  - d. Southern Carbonate Front
  - e. Flathead Thrust Faulted Carbonate-Rich Mountains
- 77 North Cascades**
- a. North Cascades Lowland Forests
  - b. North Cascades Highland Forests
  - c. North Cascades Subalpine/Alpine
  - d. Pasayten/Sawtooth Highlands
  - e. Okanogan Pine/Fir Hills
  - f. Chelan Tephra Hills
  - g. Wenatchee/Chelan Highlands
  - h. Chiwaukum Hills and Lowlands
  - i. High Olympics
- 78 Klamath Mountains**
- a. Rogue/Willamette Valleys
  - b. Oak Savanna Foothills
  - c. Umpqua Interior Foothills
  - d. Serpentine Siskiyou
  - e. Inland Siskiyou
  - f. Coastal Siskiyou
  - g. Klamath River Ridges
- 80 Northern Basin and Range**
- a. Dissected High Lava Plateau
  - b. Semiarid Hills and Low Mountains
  - c. High Elevation Forests and Shrublands
  - d. Pluvial Lake Basins
  - e. High Desert Wetlands
  - f. Owyhee Uplands and Canyons
  - g. High Lava Plains
  - h. Sagebrush-Dominated Valleys
  - i. Sagebrush Steppe Valleys
  - j. Semiarid Uplands
  - k. Partly Forested Mountains
  - l. Salt Shrub Valleys
  - m. Barren Playas

**EXPLANATION**  
 1 U. S. Environmental Protection Agency Level 3 Ecoregion boundary and number  
 a Level 4 Ecoregion id code, see chart below

Base map modified from digital data, various sources and scales. Ecoregion data from U. S. Environmental Protection Agency, Level 3 and Level 4 Ecoregions. Accessed: [http://www.epa.gov/wed/pages/ecoregionlevel\\_3\\_4.htm](http://www.epa.gov/wed/pages/ecoregionlevel_3_4.htm). Coordinate system: Albers Equal Area. SPM=29.5°; SP2=45.5°; CM=98°; LO=23°. Datum is North American Datum of 1983.

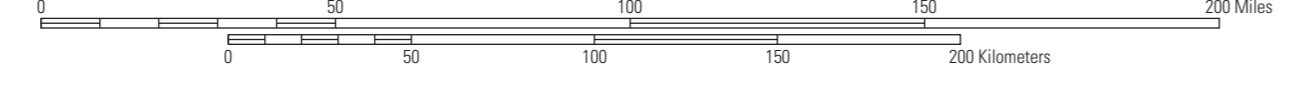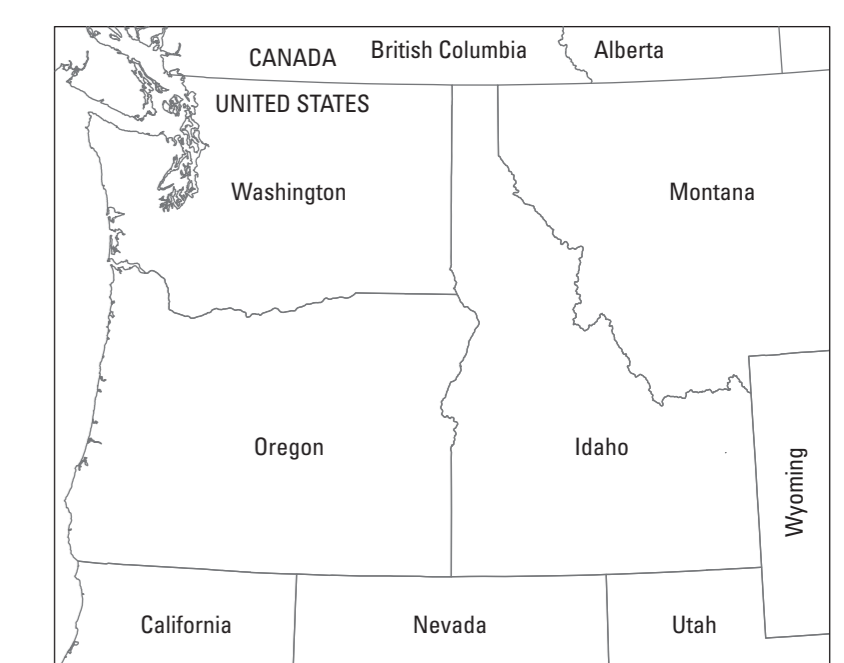

U. S. Environmental Protection Agency Level 3 and Level 4 Ecoregion Boundaries in the United States Pacific Northwest
